# Supplementary material for: NHPI and palladium cocatalyzed aerobic oxidative acylation of arenes through a radical process
Source: Royal Society of Chemistry journal article supplement (doi:10.1039/c5cc08945j), 2015-11-19

# Electronic Supplementary Information

## NHPI and palladium cocatalyzed aerobic oxidative acylation of arenes through a radical process

Yu-Feng Liang,<sup>a</sup> Xiaoyang Wang,<sup>a</sup> Conghui Tang,<sup>a</sup> Tao Shen,<sup>a</sup> Jianzhong Liu,<sup>a</sup> and Ning Jiao<sup>a,b\*</sup>

<sup>a</sup>State Key Laboratory of Natural and Biomimetic Drugs, School of Pharmaceutical Sciences, Peking University, Xue Yuan Rd. 38, Beijing 100191, China

<sup>b</sup>State Key Laboratory of Organometallic Chemistry, Chinese Academy of Sciences, Shanghai 200032, China

E-mail: jiaoning@pku.edu.cn

Fax: (+86)10-82805297

### Table of Contents

|                                                            |     |
|------------------------------------------------------------|-----|
| <b>General Remarks</b>                                     | S2  |
| <b>Screening with Different Reaction Conditions</b>        | S2  |
| <b>Screening of Substrates with Other Directing Groups</b> | S3  |
| <b>The Effect of Radical Inhibitors</b>                    | S4  |
| <b>Irreversible H/D Exchange</b>                           | S4  |
| <b>Intermolecular Isotope Effect Experiment</b>            | S6  |
| <b>The Comparison of the Individual Reactivities</b>       | S7  |
| <b>Experimental Section</b>                                |     |
| Materials Preparation                                      | S7  |
| General Procedure                                          |     |
| <b>Analytical Data for Products</b>                        | S8  |
| <b>References</b>                                          | S27 |
| <b><sup>1</sup>H NMR and <sup>13</sup>C NMR Spectra</b>    | S28 |

## General Remarks

Pd(OAc)<sub>2</sub> was purchased from Sigma-Aldrich Chemical Company. NHPI was purchased from Sigma-Aldrich Chemical Company. 1,4-Dioxane, DCE, toluene and other solvents were purchased from Beijing Chemical Works and used as received without further purification. Other commercially available compounds were purchased from TCI, Alfa Aesar, Admas or prepared according to literatures. Analysis of crude reaction mixture was done on an Agilent 7890 GC System with an Agilent 5975 Mass Selective Detector. Products were purified by flash chromatography or by preparative thin-layer chromatography on silica gel. <sup>1</sup>H-NMR spectra were recorded on Bruker AVIII-400 spectrometers. Chemical shifts (in ppm) were calibrated with CDCl<sub>3</sub> (tetramethylsilane, δ = 0 ppm) or CD<sub>3</sub>SOCD<sub>3</sub> (dimethyl sulfoxide, δ = 2.50 ppm). <sup>13</sup>C-NMR spectra were obtained by using the same NMR spectrometers and were calibrated with CDCl<sub>3</sub> (δ = 77.00 ppm) or CD<sub>3</sub>SOCD<sub>3</sub> (dimethyl sulfoxide, δ = 39.50 ppm). Mass spectra were recorded using a PE SCLEX QSTAR spectrometer. High resolution mass spectra were obtained with a Bruker APEX IV Fourier transform ion cyclotron resonance mass spectrometer using electrospray ionisation (ESI). Fourier-transform infrared (FTIR) spectra were obtained with a Nicolet Nexus 470 Fourier transform infrared spectrometer.

**Table S1. Screening with Different Reaction Conditions<sup>a</sup>**

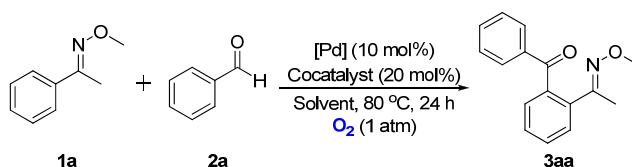

| Entry    | [Pd]                       | Cocatalyst           | Solvent            | Yield [%] |
|----------|----------------------------|----------------------|--------------------|-----------|
| 1        | Pd(OAc) <sub>2</sub>       | NHPI                 | CH <sub>3</sub> CN | 20        |
| 2        | Pd(OAc) <sub>2</sub>       | NHPI                 | THF                | trace     |
| 3        | Pd(OAc) <sub>2</sub>       | NHPI                 | DMF                | trace     |
| 4        | Pd(OAc) <sub>2</sub>       | NHPI                 | PhCF <sub>3</sub>  | trace     |
| 5        | Pd(OAc) <sub>2</sub>       | NHPI                 | PhCl               | 31        |
| 6        | Pd(OAc) <sub>2</sub>       | NHPI                 | DCE                | 67        |
| <b>7</b> | <b>Pd(OAc)<sub>2</sub></b> | <b>NHPI</b>          | <b>dioxane</b>     | <b>74</b> |
| 8        | Pd(OAc) <sub>2</sub>       | TEMPO                | dioxane            | 0         |
| 9        | Pd(OAc) <sub>2</sub>       | Cu(OAc) <sub>2</sub> | dioxane            | 0         |
| 10       | Pd(OAc) <sub>2</sub>       | BQ                   | dioxane            | 0         |
| 11       | PdCl <sub>2</sub>          | NHPI                 | dioxane            | 31        |
| 12       | Pd(TFA) <sub>2</sub>       | NHPI                 | dioxane            | 68        |

|                 |                                  |      |         |    |
|-----------------|----------------------------------|------|---------|----|
| 13              | Pd <sub>2</sub> dba <sub>3</sub> | NHPI | dioxane | 55 |
| 14 <sup>b</sup> | Pd(OAc) <sub>2</sub>             | NHPI | dioxane | 52 |
| 15 <sup>c</sup> | Pd(OAc) <sub>2</sub>             | NHPI | dioxane | 0  |
| 16 <sup>d</sup> | Pd(OAc) <sub>2</sub>             | NHPI | dioxane | 55 |
| 17              | Pd(OAc) <sub>2</sub>             | --   | dioxane | 0  |
| 18              | --                               | NHPI | dioxane | 0  |

<sup>a</sup> Reaction conditions: **1a** (0.5 mmol), **2a** (2.0 equiv), [Pd] (10 mol%), cocatalyst (20 mol%), solvent (1 mL), O<sub>2</sub> (1 atm), 80 °C, 24 h. Yield of isolated of **3aa**. <sup>b</sup> Under air (1 atm). <sup>c</sup> Under Ar (1 atm). <sup>d</sup> At 60 °C.

### Scheme S1. Screening of Substrates with Other Directing Groups<sup>a</sup>

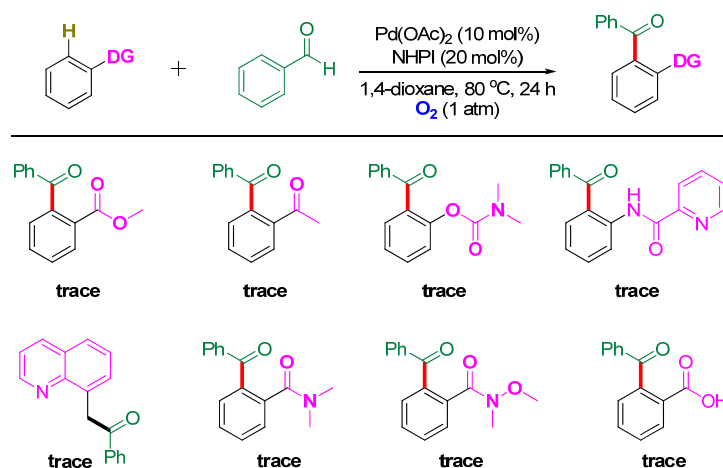

<sup>a</sup>Reaction conditions: substrate (0.5 mmol), benzaldehyde (2.0 equiv), Pd(OAc)<sub>2</sub> (10 mol%), NHPI (20 mol%), 1,4-dioxane (1 mL) was stirred at 80 °C for 24 h under O<sub>2</sub> (1 atm).

## The Effect of Radical Inhibitors<sup>a</sup>

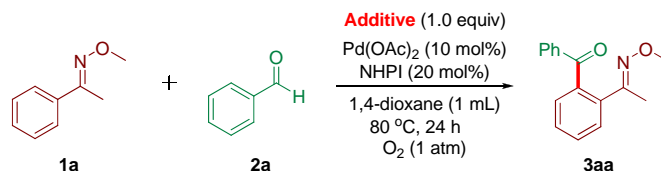

| Additive              | Yield of <b>3aa</b> |
|-----------------------|---------------------|
| none                  | 74%                 |
| ascorbic acid         | 0%                  |
| 1, 1-diphenylethylene | 0%                  |

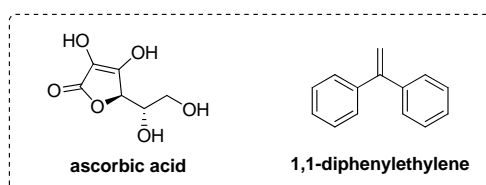

<sup>a</sup>Reaction conditions: **1a** (0.5 mmol), **2a** (2.0 equiv), additive (1.0 equiv), Pd(OAc)<sub>2</sub> (10 mol%), NHPI (20 mol%), 1,4-dioxane (1 mL) was stirred at 80 °C for 24 h under O<sub>2</sub> (1 atm). Isolated yields.

The reactions were totally inhibited in the presence of ascorbic acid or 1,1-diphenylethylene, respectively. The results suggested that this oxidative acylation may involve a radical intermediate.

## Irreversible H/D Exchange

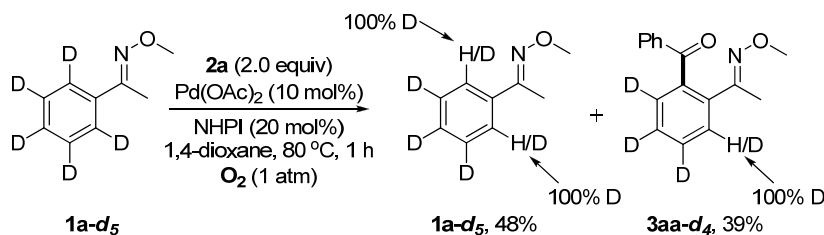

Reaction conditions: acetophenone *O*-methyl oxime-d<sub>5</sub> **1a-d<sub>5</sub>** (77 mg, 0.5 mmol), benzaldehyde **2a** (106 mg, 2.0 equiv), Pd(OAc)<sub>2</sub> (11.4 mg, 10 mol%), NHPI (16.3 mg, 20 mol%), 1,4-dioxane (1.0 mL) were added to a 25 mL Schlenk tube with a magnetic bar under O<sub>2</sub>. The mixture was stirred at 80 °C for 1 h. The solution was then diluted with ethyl acetate (15 mL), washed with brine (3\*5 mL), dried over anhydrous Na<sub>2</sub>SO<sub>4</sub>, filtered, and evaporated under vacuum. The crude reaction mixture was purified by column chromatography on silica gel (petroleum ether/ethyl acetate = 20:1) to get **1a-d<sub>5</sub>**

(37 mg, 37% yield) and acylation product **3aa-d<sub>4</sub>** (50 mg, 39% yield). No H/D exchange was observed on the base of <sup>1</sup>H NMR analysis of the recovered substrate **1a-d<sub>5</sub>** and the acylation product **3aa-d<sub>4</sub>**.

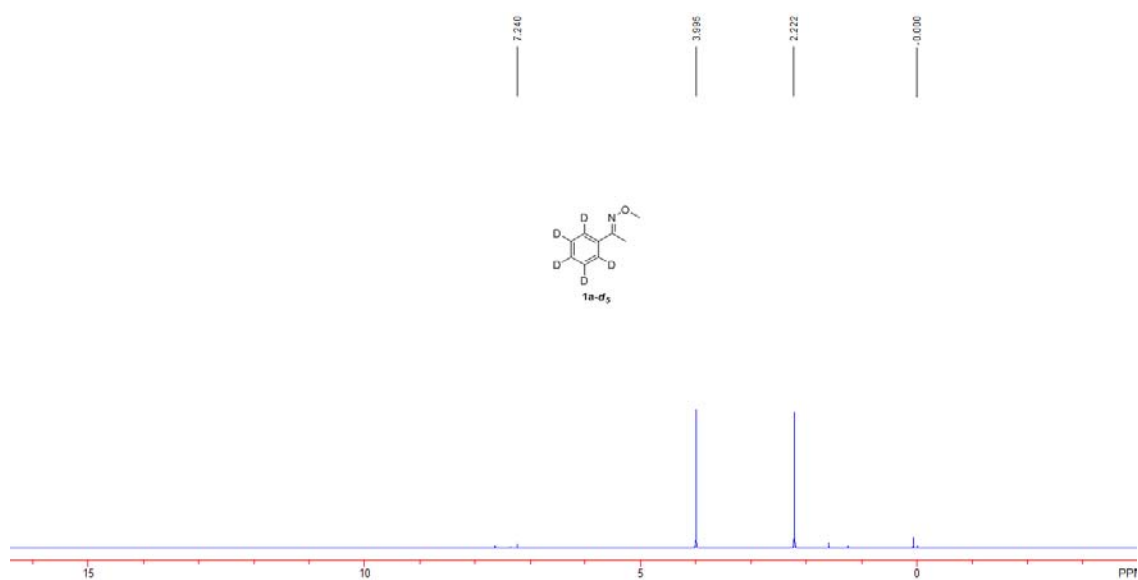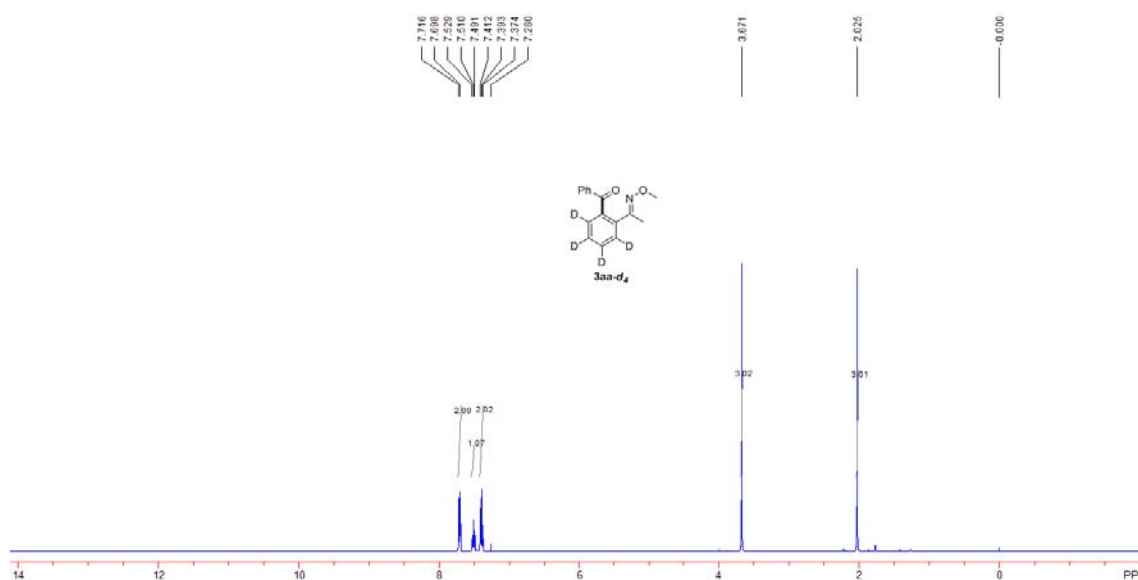

## Intermolecular Isotope Effect Experiment

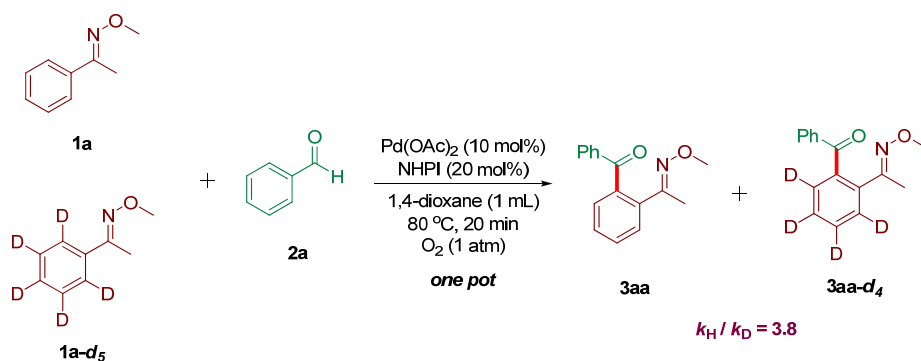

Reaction conditions: acetophenone *O*-methyl oxime **1a** (37.3 mg, 0.25 mmol) and acetophenone *O*-methyl oxime- $d_5$  **1a-d<sub>5</sub>** (38.5 mg, 0.25 mmol), benzaldehyde **2a** (106 mg, 2.0 equiv), Pd(OAc)<sub>2</sub> (11.4 mg, 10 mol%), NHPI (16.3 mg, 20 mol%), 1,4-dioxane (1.0 mL) were added to a 25 mL Schlenk tube with a magnetic bar under O<sub>2</sub>. The mixture was stirred at 80 °C for 20 min. The solution was then diluted with ethyl acetate (15 mL), washed with brine (3\*5 mL), dried over anhydrous Na<sub>2</sub>SO<sub>4</sub>, filtered, and evaporated under vacuum. The crude reaction mixture was purified by column chromatography on silica gel (petroleum ether/ethyl acetate = 20:1) to get product **3aa** and **3aa-d<sub>4</sub>** (32 mg, 25% yield). The <sup>1</sup>H NMR analysis showed that ratio of **3aa** to **3aa-d<sub>4</sub>** is 3.16 : 0.84 = 3.8 (compared with the standard <sup>1</sup>H NMR spectrum of **3aa**, the integration of the peak at 7.55-7.46 ppm was 4.16 instead of 5.00).

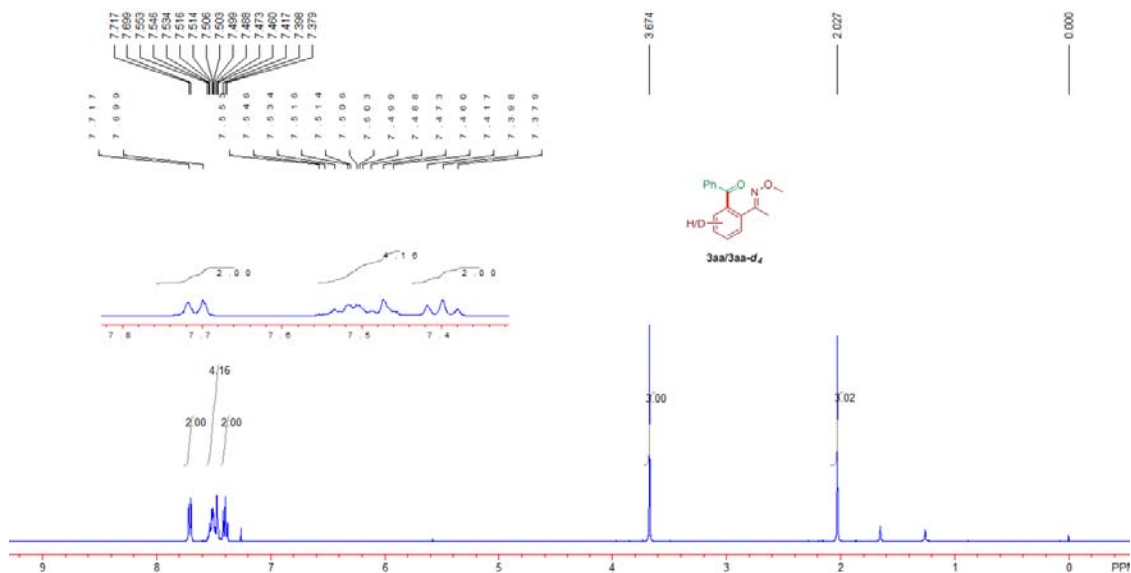

## The Comparison of the Individual Reactivities

The individual reactivities of **1a** and **1a-d<sub>5</sub>** suggested that **1a** reacted faster than **1a-d<sub>5</sub>** to afford the acylation product, which were in accordance with the irreversible H/D exchange and intermolecular isotope effect experiment.

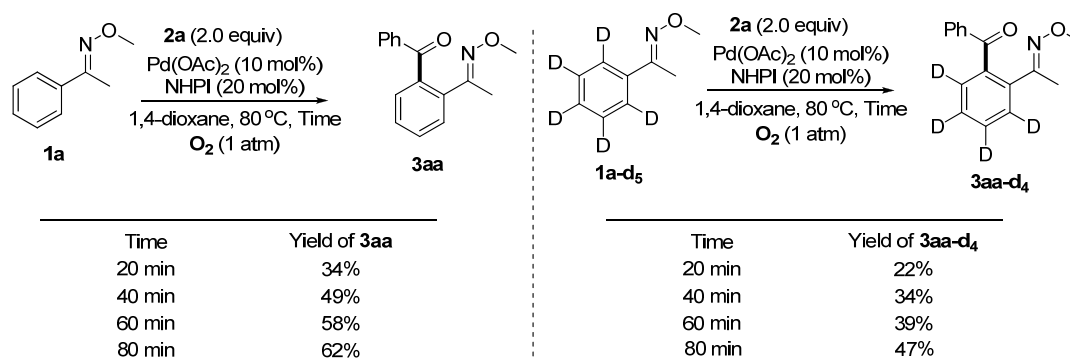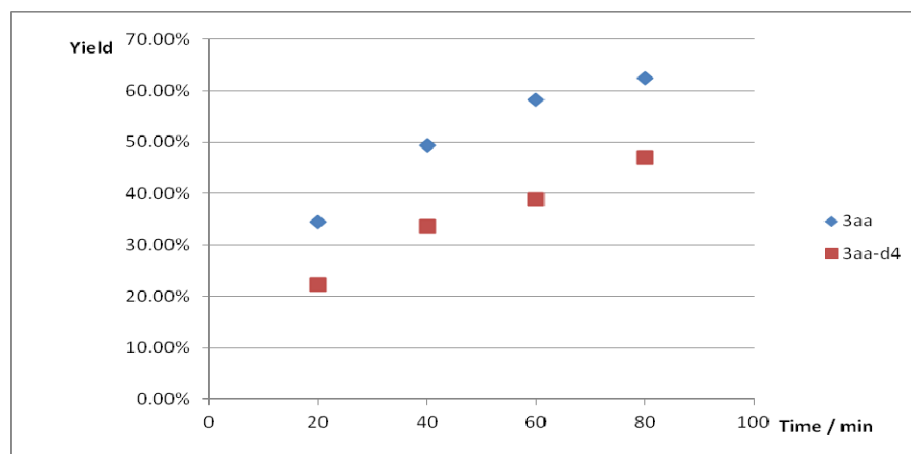

## Experimental Section

### 1) Materials Preparation

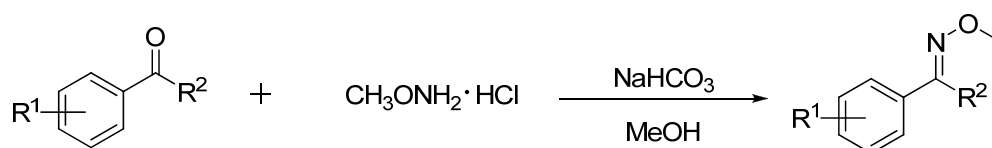

The substrates oxime ethers were prepared according to the literature<sup>1</sup>: The parent ketone (10 mmol) was dissolved in MeOH (20 mL) and methoxylamine hydrochloride (3.0 equiv) was added. The reaction mixture was stirred at room temperature for 10 min and then NaHCO<sub>3</sub> (3.0 equiv) was gradually added. Stirring was continued for further 6 h. The solution was then diluted with ethyl acetate (30 mL), washed with brine (10 mL), extracted with ethyl acetate (3\*20 mL), dried over anhydrous Na<sub>2</sub>SO<sub>4</sub>, filtered, and evaporated under vacuum. The crude reaction mixture was purified by column chromatography on silica gel to get the oxime ethers.

## 2) General Procedure

Acetophenone O-methyl oxime **1a** (75 mg, 0.5 mmol), benzaldehyde **2a** (106 mg, 2.0 equiv), Pd(OAc)<sub>2</sub> (11.4 mg, 10 mol%), NHPI (16.3 mg, 20 mol%), 1,4-dioxane (1.0 mL) were added to a 25 mL Schlenk tube with a magnetic bar under O<sub>2</sub>. The mixture was stirred at 80 °C for 24 monitored by TLC. The solution was then diluted with ethyl acetate (15 mL), washed with brine (3x5 mL), dried over anhydrous Na<sub>2</sub>SO<sub>4</sub>, filtered, and evaporated under vacuum. The crude reaction mixture was purified by column chromatography on silica gel (petroleum ether/ethyl acetate = 20:1, R<sub>f</sub> = 0.3) to get product **3aa** (93 mg, 74% yield).

## Analytical Data for Products

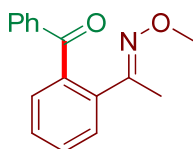

1):

**(2-(1-(Methoxyimino)ethyl)phenyl)(phenyl)methanone (3aa)**.<sup>2</sup> The reaction of acetophenone O-methyl oxime **1a** (75 mg, 0.5 mmol), benzaldehyde **2a** (106 mg, 2.0 equiv), Pd(OAc)<sub>2</sub> (11.4 mg, 10 mol%), NHPI (16.3 mg, 20 mol%), in 1,4-dioxane (1.0 mL), at 80 °C, under O<sub>2</sub> (1 atm), for 24 h, afforded 93 mg (74%) of **3aa**. **3aa**: white solid; <sup>1</sup>H NMR (400 MHz, CDCl<sub>3</sub>): δ 7.71 (d, *J* = 8.8 Hz, 2 H), 7.55-7.47 (m, 5 H), 7.40 (t, *J* = 7.6 Hz, 2 H), 3.67 (s, 3 H), 2.02 (s, 3 H); <sup>13</sup>C NMR (100 MHz, CDCl<sub>3</sub>): δ 197.5, 153.9, 138.7, 138.1, 136.3, 132.4, 130.1, 129.2, 128.9, 128.5, 128.2, 127.6, 61.6, 14.3 ppm; MS (70 ev): *m/z* (%): 77.0 (20), 222.0 (100), 253.0 (M<sup>+</sup>, 10).



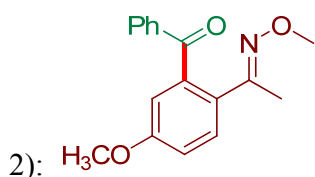

**(5-Methoxy-2-(1-(methoxyimino)ethyl)phenyl)(phenyl)methanone (3ba).**<sup>2</sup> The reaction of 1-(4-methoxyphenyl)ethanone *O*-methyl oxime **1b** (90 mg, 0.5 mmol), benzaldehyde **2a** (106 mg, 2.0 equiv), Pd(OAc)<sub>2</sub> (11.4 mg, 10 mol%), NHPI (16.3 mg, 20 mol%), in 1,4-dioxane (1.0 mL), at 80 °C, under O<sub>2</sub> (1 atm), for 24 h, afforded 113 mg (80%) of **3ba**. **3ba**: white solid; <sup>1</sup>H NMR (400 MHz, CDCl<sub>3</sub>): δ 7.70 (d, *J* = 7.2 Hz, 2 H), 7.50 (t, *J* = 7.2 Hz, 1 H), 7.42 (d, *J* = 8.4 Hz, 1 H), 7.38 (t, *J* = 7.6 Hz, 2 H), 7.04 (dd, *J* = 2.8, 8.8 Hz, 1 H), 6.99 (d, *J* = 2.4 Hz, 1 H), 3.82 (s, 3 H), 3.62 (s, 3 H), 1.98 (s, 3 H); <sup>13</sup>C NMR (100 MHz, CDCl<sub>3</sub>): δ 197.1, 159.6, 153.1, 140.1, 137.9, 132.4, 129.0, 128.8, 128.4, 128.1, 115.7, 113.9, 61.3, 55.4, 13.9 ppm; MS (70 ev): *m/z* (%): 77.0 (30), 252.0 (100), 283.0 (M<sup>+</sup>, 20).

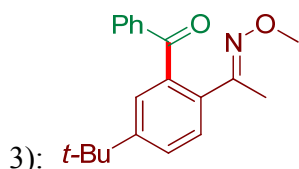

**(5-Tert-butyl-2-(1-(methoxyimino)ethyl)phenyl)(phenyl)methanone (3ca).**<sup>2</sup> The reaction of 1-(4-*tert*-butylphenyl)ethanone *O*-methyl oxime **1c** (103 mg, 0.5 mmol), benzaldehyde **2a** (106 mg, 2.0 equiv), Pd(OAc)<sub>2</sub> (11.4 mg, 10 mol%), NHPI (16.3 mg, 20 mol%), in 1,4-dioxane (1.0 mL), at 80 °C, under O<sub>2</sub> (1 atm), for 24 h, afforded 122 mg (79%) of **3ca**. **3ca**: white solid; <sup>1</sup>H NMR (400 MHz, CDCl<sub>3</sub>): δ 7.71 (d, *J* = 6.8 Hz, 2 H), 7.55 (dd, *J* = 2.4, 8.4 Hz, 1 H), 7.51-7.47 (m, 2 H), 7.44-7.36 (m, 3 H), 3.65 (s, 3 H), 2.00 (s, 3 H), 1.33 (s, 9 H); <sup>13</sup>C NMR (100 MHz, CDCl<sub>3</sub>): δ 197.8, 153.6, 151.8, 138.3, 138.2, 133.4, 132.2, 129.1, 128.0, 127.2, 127.0, 125.8, 61.4, 34.6, 31.0, 14.1 ppm; MS (70 ev): *m/z* (%): 77.0 (20), 278.0 (100), 309.0 (M<sup>+</sup>, 10).

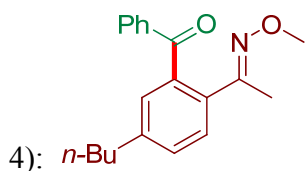

**(5-Butyl-2-(1-(methoxyimino)ethyl)phenyl)(phenyl)methanone (3da).** The reaction of 1-(4-butylphenyl)ethanone *O*-methyl oxime **1d** (103 mg, 0.5 mmol), benzaldehyde **2a** (106 mg, 2.0 equiv), Pd(OAc)<sub>2</sub> (11.4 mg, 10 mol%), NHPI (16.3 mg, 20 mol%), in 1,4-dioxane (1.0 mL), at 80 °C, under O<sub>2</sub> (1 atm), for 24 h, afforded 94 mg (61%) of **3da**. **3da**: white solid; <sup>1</sup>H NMR (400 MHz, CDCl<sub>3</sub>): δ 7.71 (d, *J* = 6.8 Hz, 2 H), 7.50 (t, *J* =

7.2 Hz, 1 H), 7.41-7.28 (m, 5 H), 3.65 (s, 3 H), 2.66 (t,  $J = 7.2$  Hz, 2 H), 2.00 (s, 3 H), 1.65-1.57 (m, 2 H), 1.40-1.30 (m, 2 H), 0.93 (t,  $J = 7.6$  Hz, 3 H);  $^{13}\text{C}$  NMR (100 MHz,  $\text{CDCl}_3$ ):  $\delta$  197.7, 153.8, 143.7, 138.6, 138.2, 133.6, 132.3, 130.1, 129.1, 128.9, 128.1, 127.4, 61.5, 35.1, 33.2, 22.2, 14.2, 13.8 ppm; HRMS  $m/z$  (ESI) calcd for  $\text{C}_{20}\text{H}_{24}\text{NO}_2$  ( $\text{M} + \text{H}$ ) $^+$  310.18016, found 310.18049.

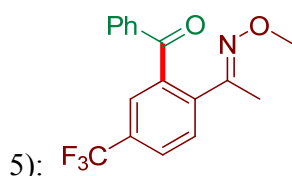

**(2-(1-(Methoxyimino)ethyl)-5-(trifluoromethyl)phenyl)(phenyl)methanone (3ea).**<sup>3</sup> The reaction of 1-(4-(trifluoromethyl)phenyl)ethanone *O*-methyl oxime **1e** (109 mg, 0.5 mmol), benzaldehyde **2a** (106 mg, 2.0 equiv),  $\text{Pd}(\text{OAc})_2$  (11.4 mg, 10 mol%), NHPI (16.3 mg, 20 mol%), in 1,4-dioxane (1.0 mL), at 80 °C, under  $\text{O}_2$  (1 atm), for 24 h, afforded 91 mg (57%) of **3ea**. **3ea**: white solid;  $^1\text{H}$  NMR (400 MHz,  $\text{CDCl}_3$ ):  $\delta$  7.78 (d,  $J = 8.4$  Hz, 1 H), 7.72-7.68 (m, 3 H), 7.63 (d,  $J = 8.4$  Hz, 1 H), 7.55 (t,  $J = 7.6$  Hz, 1 H), 7.42 (d,  $J = 8.0$  Hz, 2 H), 3.67 (s, 3 H), 2.05 (s, 3 H);  $^{13}\text{C}$  NMR (100 MHz,  $\text{CDCl}_3$ ):  $\delta$  196.0, 152.6, 139.5, 139.4, 137.3, 132.9, 130.7 (q,  $J = 32.7$  Hz), 129.2, 128.4, 128.0, 126.7 (q,  $J = 3.2$  Hz), 125.7 (q,  $J = 4.4$  Hz), 123.6 (q,  $J = 271.0$  Hz), 61.8, 14.0 ppm; MS (70 ev):  $m/z$  (%): 77.1 (30), 276.1 (20), 290.1 (100), 321.1 ( $\text{M}^+$ , 10).

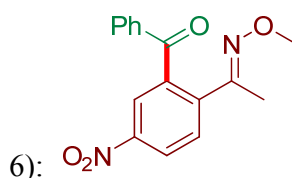

**(2-(1-(Methoxyimino)ethyl)-5-nitrophenyl)(phenyl)methanone (3fa).** The reaction of 1-(4-nitrophenyl)ethanone *O*-methyl oxime **1f** (97 mg, 0.5 mmol), benzaldehyde **2a** (106 mg, 2.0 equiv),  $\text{Pd}(\text{OAc})_2$  (11.4 mg, 10 mol%), NHPI (16.3 mg, 20 mol%), in 1,4-dioxane (1.0 mL), at 80 °C, under  $\text{O}_2$  (1 atm), for 24 h, afforded 74 mg (50%) of **3fa**. **3fa**: white solid;  $^1\text{H}$  NMR (400 MHz,  $\text{CDCl}_3$ ):  $\delta$  8.37 (dd,  $J = 2.4, 8.4$  Hz, 1 H), 8.29 (d,  $J = 2.4, 1$  H), 7.71-7.68 (m, 3 H), 7.57 (t,  $J = 7.2, 1$  H), 7.44 (t,  $J = 7.6, 2$  H), 3.67 (s, 3 H), 2.08 (s, 3 H);  $^{13}\text{C}$  NMR (100 MHz,  $\text{CDCl}_3$ ):  $\delta$  194.9, 152.0, 147.3, 141.9, 140.1, 136.9, 133.2, 129.2, 128.6, 128.5, 124.6, 123.7, 62.0, 13.8 ppm; HRMS  $m/z$  (ESI) calcd for  $\text{C}_{16}\text{H}_{15}\text{N}_2\text{O}_4$  ( $\text{M} + \text{H}$ ) $^+$  299.10263, found 299.10301.

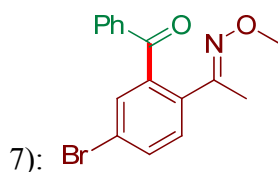

**(5-Bromo-2-(1-(methoxyimino)ethyl)phenyl)(phenyl)methanone (3ga).**<sup>2</sup> The reaction of 1-(4-bromophenyl)ethanone *O*-methyl oxime **1g** (114 mg, 0.5 mmol), benzaldehyde **2a** (106 mg, 2.0 equiv), Pd(OAc)<sub>2</sub> (11.4 mg, 10 mol%), NHPI (16.3 mg, 20 mol%), in 1,4-dioxane (1.0 mL), at 80 °C, under O<sub>2</sub> (1 atm), for 24 h, afforded 88 mg (53%) of **3ga**. **3ga**: white solid; <sup>1</sup>H NMR (400 MHz, CDCl<sub>3</sub>): δ 7.69 (d, *J* = 7.2 Hz, 2 H), 7.64 (dd, *J* = 2.0, 8.4 Hz, 1 H), 7.58 (d, *J* = 2.0 Hz, 1 H), 7.53 (t, *J* = 7.6 Hz, 1 H), 7.42-7.36 (m, 3 H), 3.63 (s, 3 H), 2.00 (s, 3 H); <sup>13</sup>C NMR (100 MHz, CDCl<sub>3</sub>): δ 195.7, 152.6, 140.3, 137.4, 134.9, 132.9, 132.7, 131.5, 129.1, 129.0, 128.2, 122.7, 61.6, 13.9 ppm; MS (70 ev): *m/z* (%): 77.0 (50), 300.0 (100), 331.0 (M<sup>+</sup>, 10).

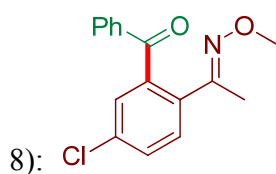

**(5-Chloro-2-(1-(methoxyimino)ethyl)phenyl)(phenyl)methanone (3ha).**<sup>2</sup> The reaction of 1-(4-chlorophenyl)ethanone *O*-methyl oxime **1h** (92 mg, 0.5 mmol), benzaldehyde **2a** (106 mg, 2.0 equiv), Pd(OAc)<sub>2</sub> (11.4 mg, 10 mol%), NHPI (16.3 mg, 20 mol%), in 1,4-dioxane (1.0 mL), at 80 °C, under O<sub>2</sub> (1 atm), for 24 h, afforded 85 mg (59%) of **3ha**. **3ha**: white solid; <sup>1</sup>H NMR (400 MHz, CDCl<sub>3</sub>): δ 7.69 (d, *J* = 7.2 Hz, 2 H), 7.54-7.47 (m, 2 H), 7.44-7.38 (m, 4 H), 3.63 (s, 3 H), 2.00 (s, 3 H); <sup>13</sup>C NMR (100 MHz, CDCl<sub>3</sub>): δ 195.8, 152.6, 140.2, 137.4, 134.6, 134.5, 132.7, 129.9, 129.0, 128.8, 128.7, 128.2, 61.6, 13.9 ppm; MS (70 ev): *m/z* (%): 77.0 (30), 256.0 (100), 287.0 (M<sup>+</sup>, 10).

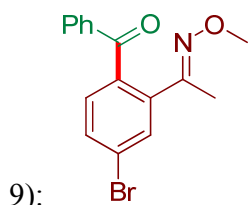

**(4-Bromo-2-(1-(methoxyimino)ethyl)phenyl)(phenyl)methanone (3ia).**<sup>2</sup> The reaction of 1-(3-bromophenyl)ethanone *O*-methyl oxime **1i** (114 mg, 0.5 mmol), benzaldehyde **2a** (106 mg, 2.0 equiv), Pd(OAc)<sub>2</sub> (11.4 mg, 10 mol%), NHPI (16.3 mg, 20 mol%), in 1,4-dioxane (1.0 mL), at 80 °C, under O<sub>2</sub> (1 atm), for 24 h, afforded 96 mg (58%) of **3ia**. **3ia**: white solid; <sup>1</sup>H NMR (400 MHz, CDCl<sub>3</sub>): δ 7.68 (d, *J* = 6.8 Hz, 2 H), 7.64 (d, *J* = 2.0 Hz, 1 H), 7.58 (dd, *J* = 2.0, 8.4 Hz, 1 H), 7.52 (t, *J* = 7.6 Hz, 1 H), 7.40 (t, *J* = 7.6 Hz, 2 H), 7.34 (d, *J* = 8.4 Hz, 1 H), 3.67 (s, 3 H), 1.99 (s, 3 H); <sup>13</sup>C NMR (100 MHz, CDCl<sub>3</sub>): δ 196.4, 152.7, 138.2, 137.6, 137.4, 132.7, 131.5, 130.6, 130.0, 129.1, 128.2, 124.3, 61.7, 14.2 ppm; MS (70 ev): *m/z* (%): 77.0 (40), 300.0 (100), 331.0 (M<sup>+</sup>, 10).

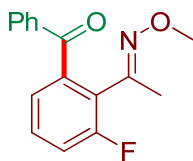

10):

**(3-Fluoro-2-(1-(methoxyimino)ethyl)phenyl)(phenyl)methanone (3ja).**<sup>2</sup> The reaction of 1-(2-fluorophenyl)ethanone *O*-methyl oxime **1j** (84 mg, 0.5 mmol), benzaldehyde **2a** (106 mg, 2.0 equiv), Pd(OAc)<sub>2</sub> (11.4 mg, 10 mol%), NHPI (16.3 mg, 20 mol%), in 1,4-dioxane (1.0 mL), at 80 °C, under O<sub>2</sub> (1 atm), for 24 h, afforded 60 mg (44%) of **3ja**. **3ja**: white solid; <sup>1</sup>H NMR (400 MHz, CDCl<sub>3</sub>): δ 7.70 (d, *J* = 7.2 Hz, 2 H), 7.54 (t, *J* = 7.2 Hz, 1 H), 7.45-7.40 (m, 3 H), 7.29-7.21 (m, 2 H), 3.67 (s, 3 H), 2.03 (s, 3 H); <sup>13</sup>C NMR (100 MHz, CDCl<sub>3</sub>): δ 196.0 (d, *J* = 3.0 Hz), 160.6 (d, *J* = 249.2 Hz), 151.6, 141.5 (d, *J* = 2.2 Hz), 137.8, 132.8, 129.9 (d, *J* = 8.4 Hz), 129.3, 128.2, 124.9 (d, *J* = 14.5 Hz), 124.4 (d, *J* = 3.0 Hz), 117.8 (d, *J* = 21.8 Hz), 61.6, 15.9 (d, *J* = 4.7 Hz) ppm; MS (70 ev): *m/z* (%): 77.0 (30), 226.0 (30), 240.0 (100), 271.0 (M<sup>+</sup>, 5).

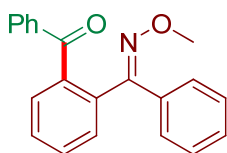

11):

**(2-((Methoxyimino)(phenyl)methyl)phenyl)(phenyl)methanone (3ka).**<sup>2</sup> The reaction of benzophenone *O*-methyl oxime **1k** (106 mg, 0.5 mmol), benzaldehyde **2a** (106 mg, 2.0 equiv), Pd(OAc)<sub>2</sub> (11.4 mg, 10 mol%), NHPI (16.3 mg, 20 mol%), in 1,4-dioxane (1.0 mL), at 80 °C, under O<sub>2</sub> (1 atm), for 24 h, afforded 135 mg (86%) of **3ka**. **3ka**: white solid; <sup>1</sup>H NMR (400 MHz, CDCl<sub>3</sub>): δ 7.73 (d, *J* = 7.2 Hz, 2 H), 7.49-7.41 (m, 4 H), 7.36 (t, *J* = 7.6 Hz, 2 H), 7.29-7.26 (m, 6 H), 3.68 (s, 3 H); <sup>13</sup>C NMR (100 MHz, CDCl<sub>3</sub>): δ 197.3, 154.6, 139.8, 137.8, 135.7, 132.5, 132.4, 130.0, 129.7, 129.4, 129.2, 129.1, 128.8, 128.7, 128.0, 127.8, 62.0 ppm; MS (70 ev): *m/z* (%): 77.0 (30), 270.0 (95), 284.0 (100), 315.0 (M<sup>+</sup>, 5).

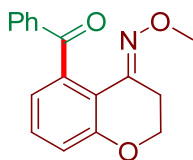

12):

**(4-(Methoxyimino)chroman-5-yl)(phenyl)methanone (3la).**<sup>2</sup> The reaction of chroman-4-one *O*-methyl oxime **1l** (89 mg, 0.5 mmol), benzaldehyde **2a** (106 mg, 2.0 equiv), Pd(OAc)<sub>2</sub> (11.4 mg, 10 mol%), NHPI (16.3 mg, 20 mol%), in 1,4-dioxane (1.0 mL), at 80 °C, under O<sub>2</sub> (1 atm), for 24 h, afforded 126 mg (90%) of **3la**. **3la**: white solid; <sup>1</sup>H NMR (400 MHz, CDCl<sub>3</sub>): δ 7.75 (d, *J* = 7.2 Hz, 2 H), 7.48 (t, *J* = 7.6 Hz, 1 H), 7.38 (t, *J* = 8.0 Hz, 2 H), 7.32 (t, *J* = 7.6 Hz, 1 H), 7.01 (d, *J* = 8.4 Hz, 1 H), 6.89 (d, *J* = 7.2 Hz, 1

H), 4.20 (t,  $J = 6.4$  Hz, 2 H), 3.50 (s, 3 H), 2.70 (t,  $J = 6.4$  Hz, 2 H);  $^{13}\text{C}$  NMR (100 MHz,  $\text{CDCl}_3$ ):  $\delta$  197.1, 156.7, 145.8, 138.7, 137.7, 132.2, 130.2, 128.8, 128.0, 120.7, 118.6, 116.0, 64.7, 61.5, 23.8 ppm; MS (70 ev):  $m/z$  (%): 77.0 (30), 250.0 (100), 281.0 ( $\text{M}^+$ , 5).

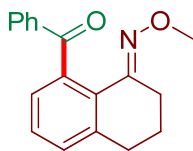

13):

**(8-(Methoxyimino)-5,6,7,8-tetrahydronaphthalen-1-yl)(phenyl)methanone(3ma).**<sup>4</sup>

The reaction of 3,4-dihydronaphthalen-1(2*H*)-one *O*-methyl oxime **1m** (88 mg, 0.5 mmol), benzaldehyde **2a** (106 mg, 2.0 equiv),  $\text{Pd}(\text{OAc})_2$  (11.4 mg, 10 mol%), NHPI (16.3 mg, 20 mol%), in 1,4-dioxane (1.0 mL), at 80 °C, under  $\text{O}_2$  (1 atm), for 24 h, afforded 84 mg (60%) of **3ma**. **3ma**: white solid;  $^1\text{H}$  NMR (400 MHz,  $\text{CDCl}_3$ ):  $\delta$  7.71 (d,  $J = 7.2$  Hz, 2 H), 7.46 (t,  $J = 7.6$  Hz, 1 H), 7.37-7.31 (m, 3 H), 7.26 (d,  $J = 7.2$  Hz, 1 H), 7.19 (d,  $J = 7.6$  Hz, 1 H), 3.53 (s, 3 H), 2.78 (t,  $J = 6.0$  Hz, 2 H), 2.56 (t,  $J = 6.4$  Hz, 2 H), 1.86-1.80 (m, 2 H);  $^{13}\text{C}$  NMR (100 MHz,  $\text{CDCl}_3$ ):  $\delta$  197.8, 151.6, 140.5, 138.5, 138.2, 132.0, 129.5, 128.8, 128.7, 128.3, 128.0, 126.2, 61.5, 30.2, 24.1, 20.9 ppm; MS (70 ev):  $m/z$  (%): 77.1 (20), 248.2 (100), 279.1 ( $\text{M}^+$ , 1).

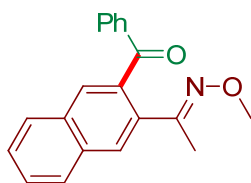

14):

**(3-(1-(Methoxyimino)ethyl)naphthalen-2-yl)(phenyl)methanone (3na).**<sup>4</sup> The reaction of 1-(naphthalen-2-yl)ethanone *O*-methyl oxime **1n** (100 mg, 0.5 mmol), benzaldehyde **2a** (106 mg, 2.0 equiv),  $\text{Pd}(\text{OAc})_2$  (11.4 mg, 10 mol%), NHPI (16.3 mg, 20 mol%), in 1,4-dioxane (1.0 mL), at 80 °C, under  $\text{O}_2$  (1 atm), for 24 h, afforded 88 mg (58%) of **3na**. **3na**: white solid;  $^1\text{H}$  NMR (400 MHz,  $\text{CDCl}_3$ ):  $\delta$  7.95 (d,  $J = 11.6$  Hz, 2 H), 7.91 (d,  $J = 8.0$  Hz, 1 H), 7.86 (d,  $J = 8.0$  Hz, 1 H), 7.76 (d,  $J = 7.2$  Hz, 2 H), 7.60-7.50 (m, 3 H), 7.40 (d,  $J = 8.0$  Hz, 2 H), 3.70 (s, 3 H), 2.15 (s, 3 H);  $^{13}\text{C}$  NMR (100 MHz,  $\text{CDCl}_3$ ):  $\delta$  197.1, 153.7, 138.2, 136.4, 133.4, 132.4, 132.2, 129.4, 129.3, 128.3, 128.1, 128.0, 127.7, 127.4, 127.3, 61.6, 14.1 ppm; MS (70 ev):  $m/z$  (%): 77.1 (40), 202.1 (30), 272.1 (100), 303.1 ( $\text{M}^+$ , 10).

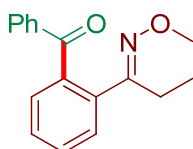

15):

**(2-(1-(Methoxyimino)propyl)phenyl)(phenyl)methanone (3oa).**<sup>2</sup> The reaction of propiophenone *O*-methyl oxime **1o** (82 mg, 0.5 mmol), benzaldehyde **2a** (106 mg, 2.0

equiv), Pd(OAc)<sub>2</sub> (11.4 mg, 10 mol%), NHPI (16.3 mg, 20 mol%), in 1,4-dioxane (1.0 mL), at 80 °C, under O<sub>2</sub> (1 atm), for 24 h, afforded 84 mg (63%) of **30a**. **30a**: white solid; <sup>1</sup>H NMR (400 MHz, CDCl<sub>3</sub>): δ 7.71 (d, *J* = 7.2 Hz, 2 H), 7.52-7.45 (m, 5 H), 7.38 (d, *J* = 7.6 Hz, 2 H), 3.65 (s, 3 H), 2.56 (q, *J* = 7.6 Hz, 2 H), 0.98 (t, *J* = 7.6 Hz, 3 H); <sup>13</sup>C NMR (100 MHz, CDCl<sub>3</sub>): δ 197.6, 158.3, 139.2, 138.0, 135.0, 132.4, 129.9, 129.3, 128.9, 128.3, 128.0, 127.5, 61.4, 21.1, 10.3 ppm; MS (70 ev): *m/z* (%): 77.0 (40), 105.0 (40), 236.0 (100), 267.0 (M<sup>+</sup>, 5).

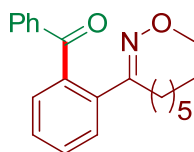

16):

**(2-(1-(Methoxyimino)heptyl)phenyl)(phenyl)methanone (3pa)**.<sup>2</sup> The reaction of 1-phenylheptan-1-one *O*-methyl oxime **1c** (110 mg, 0.5 mmol), benzaldehyde **2a** (106 mg, 2.0 equiv), Pd(OAc)<sub>2</sub> (11.4 mg, 10 mol%), NHPI (16.3 mg, 20 mol%), in 1,4-dioxane (1.0 mL), at 80 °C, under O<sub>2</sub> (1 atm), for 24 h, afforded 105 mg (65%) of **3pa**. **3pa**: white solid; <sup>1</sup>H NMR (400 MHz, CDCl<sub>3</sub>): δ 7.71 (d, *J* = 7.2 Hz, 2 H), 7.51-7.48 (m, 3 H), 7.44-7.42 (m, 2 H), 7.37 (t, *J* = 7.6 Hz, 2 H), 3.64 (s, 3 H), 2.52 (t, *J* = 8.0 Hz, 2 H), 1.41-1.34 (m, 2 H), 1.28-1.19 (m, 6 H), 0.84 (t, *J* = 6.8 Hz, 3 H); <sup>13</sup>C NMR (100 MHz, CDCl<sub>3</sub>): δ 197.6, 157.4, 139.2, 138.0, 135.2, 132.3, 129.8, 129.3, 128.8, 128.3, 128.0, 127.5, 61.4, 31.3, 29.3, 27.7, 25.8, 22.3, 13.9 ppm; MS (70 ev): *m/z* (%): 222.0 (100), 292.0 (80), 323.0 (M<sup>+</sup>, 5).

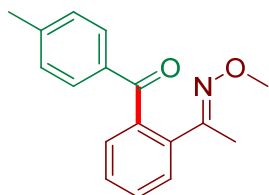

17):

**(2-(1-(Methoxyimino)ethyl)phenyl)(p-tolyl)methanone (3ab)**.<sup>2</sup> The reaction of acetophenone *O*-methyl oxime **1a** (75 mg, 0.5 mmol), 4-methylbenzaldehyde **2b** (120 mg, 2.0 equiv), Pd(OAc)<sub>2</sub> (11.4 mg, 10 mol%), NHPI (16.3 mg, 20 mol%), in 1,4-dioxane (1.0 mL), at 80 °C, under O<sub>2</sub> (1 atm), for 24 h, afforded 85 mg (64%) of **3ab**. **3ab**: white solid; <sup>1</sup>H NMR (400 MHz, CDCl<sub>3</sub>): δ 7.61 (d, *J* = 8.0 Hz, 2 H), 7.52-7.49 (m, 2 H), 7.44-7.43 (m, 2 H), 7.19 (d, *J* = 8.4 Hz, 2 H), 3.68 (s, 3 H), 2.38 (s, 3 H), 2.03 (s, 3 H); <sup>13</sup>C NMR (100 MHz, CDCl<sub>3</sub>): δ 197.2, 154.0, 143.2, 138.9, 136.2, 135.4, 129.9, 129.4, 128.8, 128.7, 128.4, 127.6, 61.5, 21.5, 14.4 ppm; MS (70 ev): *m/z* (%): 91.0 (30), 222.0 (40), 236.0 (100), 267.0 (M<sup>+</sup>, 10).

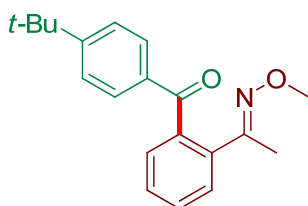

18):

**(4-*Tert*-butylphenyl)(2-(1-(methoxyimino)ethyl)phenyl)methanone (3ac).** The reaction of acetophenone *O*-methyl oxime **1a** (75 mg, 0.5 mmol), 4-*tert*-butylbenzaldehyde **2c** (162 mg, 2.0 equiv), Pd(OAc)<sub>2</sub> (11.4 mg, 10 mol%), NHPI (16.3 mg, 20 mol%), in 1,4-dioxane (1.0 mL), at 80 °C, under O<sub>2</sub> (1 atm), for 24 h, afforded 102 mg (66%) of **3ac**. **3ac**: white solid; <sup>1</sup>H NMR (400 MHz, CDCl<sub>3</sub>): δ 7.59 (d, *J* = 8.4 Hz, 2 H), 7.43-7.40 (m, 2 H), 7.35-7.32 (m, 4 H), 3.61 (s, 3 H), 1.95 (s, 3 H), 1.25 (s, 9 H); <sup>13</sup>C NMR (100 MHz, CDCl<sub>3</sub>): δ 197.2, 156.2, 154.2, 138.9, 136.4, 135.3, 129.9, 129.4, 128.8, 128.3, 127.8, 125.1, 61.5, 35.0, 31.6, 14.6 ppm; HRMS *m/z* (ESI) calcd for C<sub>20</sub>H<sub>24</sub>NO<sub>2</sub> (M + H)<sup>+</sup> 310.18016, found 310.18326.

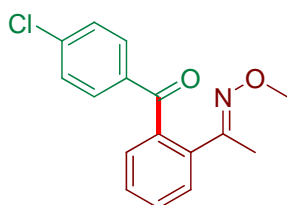

19):

**(4-Chlorophenyl)(2-(1-(methoxyimino)ethyl)phenyl)methanone (3ad).**<sup>2</sup> The reaction of acetophenone *O*-methyl oxime **1a** (75 mg, 0.5 mmol), 4-chlorobenzaldehyde **2d** (140 mg, 2.0 equiv), Pd(OAc)<sub>2</sub> (11.4 mg, 10 mol%), NHPI (16.3 mg, 20 mol%), in 1,4-dioxane (1.0 mL), at 80 °C, under O<sub>2</sub> (1 atm), for 24 h, afforded 107 mg (75%) of **3ad**. **3ad**: white solid; <sup>1</sup>H NMR (400 MHz, CDCl<sub>3</sub>): δ 7.54 (d, *J* = 8.4 Hz, 2 H), 7.43-7.32 (m, 4 H), 7.26 (d, *J* = 8.4 Hz, 2 H), 3.56 (s, 3 H), 1.94 (s, 3 H); <sup>13</sup>C NMR (100 MHz, CDCl<sub>3</sub>): δ 196.1, 153.5, 138.6, 138.2, 136.5, 135.9, 130.4, 130.2, 128.6, 128.5, 128.4, 127.5, 61.5, 14.0 ppm; MS (70 ev): *m/z* (%): 256.0 (100), 287.0 (M<sup>+</sup>, 5).

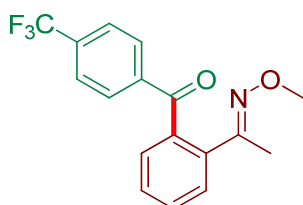

20):

**(2-(1-(Methoxyimino)ethyl)phenyl)(4-(trifluoromethyl)phenyl)methanone (3ae).**<sup>4</sup> The reaction of acetophenone *O*-methyl oxime **1a** (75 mg, 0.5 mmol), 4-(trifluoromethyl)benzaldehyde **2e** (174 mg, 2.0 equiv), Pd(OAc)<sub>2</sub> (11.4 mg, 10 mol%), NHPI (16.3 mg, 20 mol%), in 1,4-dioxane (1.0 mL), at 80 °C, under O<sub>2</sub> (1 atm), for 24 h,

afforded 85 mg (53%) of **3ae**. **3ae**: white solid;  $^1\text{H}$  NMR (400 MHz,  $\text{CDCl}_3$ ):  $\delta$  7.80 (d,  $J$  = 8.0 Hz, 2 H), 7.66 (d,  $J$  = 8.4 Hz, 2 H), 7.58-7.45 (m, 4 H), 3.64 (s, 3 H), 2.04 (s, 3 H);  $^{13}\text{C}$  NMR (100 MHz,  $\text{CDCl}_3$ ):  $\delta$  196.2, 153.4, 141.1, 138.0, 136.0, 133.6 (q,  $J$  = 32.3 Hz), 130.5, 129.2, 128.8, 128.7, 127.5, 125.2 (q,  $J$  = 2.5 Hz), 123.6 (q,  $J$  = 271.2 Hz), 61.6, 13.8 ppm; MS (70 ev):  $m/z$  (%): 145.1 (20), 276.1 (20), 290.1 (100), 321.2 ( $\text{M}^+$ , 10).

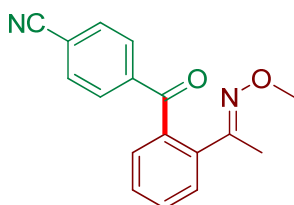

21):

**4-(2-(1-(Methoxyimino)ethyl)benzoyl)benzonitrile (3af)**. The reaction of acetophenone *O*-methyl oxime **1a** (75 mg, 0.5 mmol), 4-formylbenzonitrile **2f** (131 mg, 2.0 equiv),  $\text{Pd}(\text{OAc})_2$  (11.4 mg, 10 mol%), NHPI (16.3 mg, 20 mol%), in 1,4-dioxane (1.0 mL), at 80 °C, under  $\text{O}_2$  (1 atm), for 24 h, afforded 107 mg (77%) of **3af**. **3af**: white solid;  $^1\text{H}$  NMR (400 MHz,  $\text{CDCl}_3$ ):  $\delta$  7.76 (d,  $J$  = 8.4 Hz, 2 H), 7.69 (d,  $J$  = 8.4 Hz, 2 H), 7.60-7.45 (m, 4 H), 3.63 (s, 3 H), 2.04 (s, 3 H), 2.03 (s, 3 H);  $^{13}\text{C}$  NMR (100 MHz,  $\text{CDCl}_3$ ):  $\delta$  195.7, 153.2, 141.7, 137.6, 135.8, 132.0, 130.7, 129.1, 128.9, 128.8, 127.4, 118.0, 115.4, 61.6, 13.7 ppm; HRMS  $m/z$  (ESI) calcd for  $\text{C}_{17}\text{H}_{15}\text{N}_2\text{O}_2$  ( $\text{M} + \text{H}$ ) $^+$  279.11280, found 279.11311.

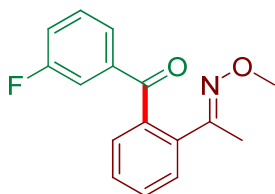

22):

**(3-Fluorophenyl)(2-(1-(methoxyimino)ethyl)phenyl)methanone (3ag)**. The reaction of acetophenone *O*-methyl oxime **1a** (75 mg, 0.5 mmol), 3-fluorobenzaldehyde **2g** (124 mg, 2.0 equiv),  $\text{Pd}(\text{OAc})_2$  (11.4 mg, 10 mol%), NHPI (16.3 mg, 20 mol%), in 1,4-dioxane (1.0 mL), at 80 °C, under  $\text{O}_2$  (1 atm), for 24 h, afforded 68 mg (50%) of **3ag**. **3ag**: white solid;  $^1\text{H}$  NMR (400 MHz,  $\text{CDCl}_3$ ):  $\delta$  7.57-7.40 (m, 6 H), 7.38-7.33 (m, 1 H), 7.23-7.18 (m, 1 H), 3.67 (s, 3 H), 2.04 (s, 3 H);  $^{13}\text{C}$  NMR (100 MHz,  $\text{CDCl}_3$ ):  $\delta$  196.1 (d,  $J$  = 2.8 Hz), 162.6 (d,  $J$  = 247.0 Hz), 153.5, 140.5 (d,  $J$  = 6.4 Hz), 138.2, 136.1, 130.3, 129.8 (d,  $J$  = 7.1 Hz), 128.8, 128.6, 127.5, 124.8 (d,  $J$  = 1.7 Hz), 119.3 (d,  $J$  = 21.6 Hz), 115.6 (d,  $J$  = 22.3 Hz), 61.5, 14.0 ppm; HRMS  $m/z$  (ESI) calcd for  $\text{C}_{16}\text{H}_{15}\text{FNO}_2$  ( $\text{M} + \text{H}$ ) $^+$  272.10813, found 272.10857.



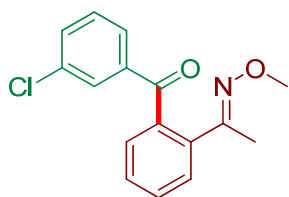

23):

**(3-Chlorophenyl)(2-(1-(methoxyimino)ethyl)phenyl)methanone (3ah).**<sup>5</sup> The reaction of acetophenone *O*-methyl oxime **1a** (75 mg, 0.5 mmol), 3-chlorobenzaldehyde **2h** (140 mg, 2.0 equiv), Pd(OAc)<sub>2</sub> (11.4 mg, 10 mol%), NHPI (16.3 mg, 20 mol%), in 1,4-dioxane (1.0 mL), at 80 °C, under O<sub>2</sub> (1 atm), for 24 h, afforded 107 mg (75%) of **3ah**. **3ah**: white solid; <sup>1</sup>H NMR (400 MHz, CDCl<sub>3</sub>): δ 7.67 (s, 1 H), 7.56-7.46 (m, 6 H), 7.33 (t, *J* = 7.6 Hz, 1 H), 3.67 (s, 3 H), 2.04 (s, 3 H); <sup>13</sup>C NMR (100 MHz, CDCl<sub>3</sub>): δ 196.0, 153.5, 139.9, 138.0, 136.1, 134.4, 132.2, 130.4, 129.5, 129.0, 128.9, 128.7, 127.5, 127.1, 61.6, 14.0 ppm; MS (70 ev): *m/z* (%): 111.1 (20), 242.1 (30), 256.1 (100), 287.1 (M<sup>+</sup>, 10).

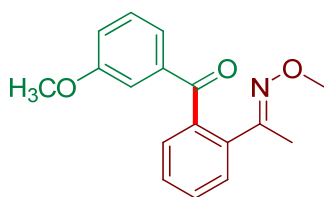

24):

**(2-(1-(Methoxyimino)ethyl)phenyl)(3-methoxyphenyl)methanone (3ai).**<sup>3</sup> The reaction of acetophenone *O*-methyl oxime **1a** (75 mg, 0.5 mmol), 3-methoxybenzaldehyde **2i** (136 mg, 2.0 equiv), Pd(OAc)<sub>2</sub> (11.4 mg, 10 mol%), NHPI (16.3 mg, 20 mol%), in 1,4-dioxane (1.0 mL), at 80 °C, under O<sub>2</sub> (1 atm), for 24 h, afforded 93 mg (66%) of **3ai**. **3ai**: white solid; <sup>1</sup>H NMR (400 MHz, CDCl<sub>3</sub>): δ 7.53-7.42 (m, 4 H), 7.34 (s, 1 H), 7.27 (t, *J* = 7.6 Hz, 1 H), 7.17 (d, *J* = 7.6 Hz, 1 H), 7.06 (d, *J* = 7.2 Hz, 1 H), 3.81 (s, 3 H), 3.69 (s, 3 H), 2.03 (s, 3 H); <sup>13</sup>C NMR (100 MHz, CDCl<sub>3</sub>): δ 197.1, 159.5, 153.8, 139.4, 138.7, 136.3, 130.1, 129.0, 128.8, 128.4, 127.5, 122.0, 118.9, 113.2, 61.5, 55.2, 14.3 ppm; MS (70 ev): *m/z* (%): 77.1 (20), 238.2 (40), 252.2 (100), 283.1 (M<sup>+</sup>, 10).

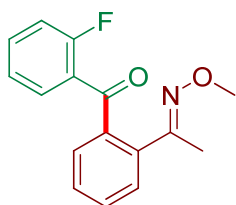

25):

**(2-Fluorophenyl)(2-(1-(methoxyimino)ethyl)phenyl)methanone (3aj).**<sup>5</sup> The reaction of acetophenone *O*-methyl oxime **1a** (75 mg, 0.5 mmol), 2-fluorobenzaldehyde **2j** (124 mg, 2.0 equiv), Pd(OAc)<sub>2</sub> (11.4 mg, 10 mol%), NHPI (16.3 mg, 20 mol%), in

1,4-dioxane (1.0 mL), at 80 °C, under O<sub>2</sub> (1 atm), for 24 h, afforded 85 mg (63%) of **3aj**. **3aj**: white solid; <sup>1</sup>H NMR (400 MHz, CDCl<sub>3</sub>): δ 7.58 (t, *J* = 7.6 Hz, 1 H), 7.55-7.51 (m, 2 H), 7.49-7.43 (m, 3 H), 7.17 (t, *J* = 7.6 Hz, 1 H), 7.05 (t, *J* = 9.2 Hz, 1 H), 3.75 (s, 3 H), 2.00 (s, 3 H); <sup>13</sup>C NMR (100 MHz, CDCl<sub>3</sub>): δ 193.8, 160.8 (d, *J* = 254.3 Hz), 154.3, 139.7, 136.4 (d, *J* = 1.5 Hz), 133.7 (d, *J* = 8.6 Hz), 130.9 (d, *J* = 1.5 Hz), 130.7, 128.9, 128.5, 127.6, 127.4 (d, *J* = 10.8 Hz), 123.8 (d, *J* = 3.2 Hz), 116.3 (d, *J* = 22.2 Hz), 61.6, 14.4 ppm; MS (70 ev): *m/z* (%): 95.1 (20), 228.1 (30), 240.1 (100), 271.1 (M<sup>+</sup>, 10).

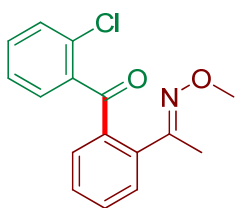

26):

**(2-Chlorophenyl)(2-(1-(methoxyimino)ethyl)phenyl)methanone (3ak)**.<sup>4</sup> The reaction of acetophenone *O*-methyl oxime **1a** (75 mg, 0.5 mmol), 2-chlorobenzaldehyde **2k** (140 mg, 2.0 equiv), Pd(OAc)<sub>2</sub> (11.4 mg, 10 mol%), NHPI (16.3 mg, 20 mol%), in 1,4-dioxane (1.0 mL), at 80 °C, under O<sub>2</sub> (1 atm), for 24 h, afforded 71 mg (50%) of **3ak**. **3ak**: white solid; <sup>1</sup>H NMR (400 MHz, CDCl<sub>3</sub>): δ 7.57-7.52 (m, 2 H), 7.45-7.36 (m, 5 H), 7.29-7.25 (m, 1 H), 3.87 (s, 3 H), 1.98 (s, 3 H); <sup>13</sup>C NMR (100 MHz, CDCl<sub>3</sub>): δ 195.5, 155.8, 138.1, 138.0, 137.8, 132.3, 131.8, 131.6, 130.9, 130.6, 130.5, 128.6, 128.5, 126.3, 61.7, 15.3 ppm; MS (70 ev): *m/z* (%): 111.1 (20), 242.1 (20), 256.1 (100), 287.1 (M<sup>+</sup>, 10).

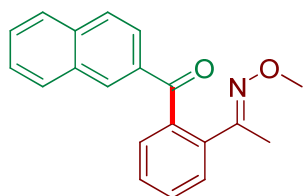

27):

**(2-(1-(Methoxyimino)ethyl)phenyl)(naphthalen-2-yl)methanone (3al)**.<sup>4</sup> The reaction of acetophenone *O*-methyl oxime **1a** (75 mg, 0.5 mmol), 2-naphthaldehyde **2l** (156 mg, 2.0 equiv), Pd(OAc)<sub>2</sub> (11.4 mg, 10 mol%), NHPI (16.3 mg, 20 mol%), in 1,4-dioxane (1.0 mL), at 80 °C, under O<sub>2</sub> (1 atm), for 24 h, afforded 79 mg (52%) of **3al**. **3al**: white solid; <sup>1</sup>H NMR (400 MHz, CDCl<sub>3</sub>): δ 8.07 (s, 1 H), 7.94 (d, *J* = 8.4 Hz, 1 H), 7.88-7.81 (m, 3 H), 7.58-7.47 (m, 6 H), 3.62 (s, 3 H), 2.01 (s, 3 H); <sup>13</sup>C NMR (100 MHz, CDCl<sub>3</sub>): δ 197.5, 154.0, 138.9, 136.4, 135.5, 135.3, 132.3, 131.0, 130.1, 129.3, 129.0, 128.5, 128.2, 127.8, 127.7, 126.5, 124.9, 61.6, 14.3 ppm; MS (70 ev): *m/z* (%): 127.1 (50), 258.1 (30), 272.1 (100), 303.1 (M<sup>+</sup>, 15).

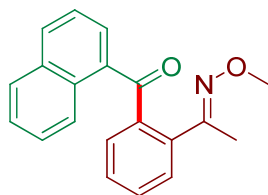

28):

**(2-(1-(Methoxyimino)ethyl)phenyl)(naphthalen-1-yl)methanone (3am).**<sup>4</sup> The reaction of acetophenone *O*-methyl oxime **1a** (75 mg, 0.5 mmol), 1-naphthaldehyde **2m** (156 mg, 2.0 equiv), Pd(OAc)<sub>2</sub> (11.4 mg, 10 mol%), NHPI (16.3 mg, 20 mol%), in 1,4-dioxane (1.0 mL), at 80 °C, under O<sub>2</sub> (1 atm), for 24 h, afforded 83 mg (55%) of **3am**. **3am**: white solid; <sup>1</sup>H NMR (400 MHz, CDCl<sub>3</sub>): δ 8.79 (d, *J* = 8.4 Hz, 1 H), 7.94 (d, *J* = 8.0 Hz, 1 H), 7.88 (d, *J* = 8.0 Hz, 1 H), 7.66-7.60 (m, 2 H), 7.56-7.53 (m, 2 H), 7.48-7.43 (m, 2 H), 7.38 (d, *J* = 6.0 Hz, 1 H), 7.32 (t, *J* = 8.0 Hz, 1 H), 3.51 (s, 3 H), 1.86 (s, 3 H); <sup>13</sup>C NMR (100 MHz, CDCl<sub>3</sub>): δ 198.7, 155.1, 140.2, 137.6, 136.1, 133.8, 132.6, 131.0, 130.8, 130.1, 129.3, 128.4, 128.2, 128.0, 127.6, 126.4, 126.3, 123.8, 61.5, 15.0 ppm; MS (70 ev): *m/z* (%): 127.1 (50), 258.1 (20), 272.1 (100), 303.1 (M<sup>+</sup>, 5).

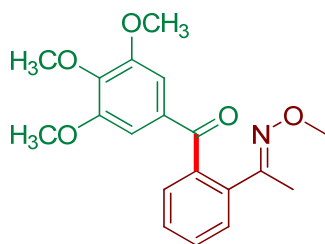

29):

**(2-(1-(Methoxyimino)ethyl)phenyl)(3,4,5-trimethoxyphenyl)methanone (3an).** The reaction of acetophenone *O*-methyl oxime **1a** (75 mg, 0.5 mmol), 3,4,5-trimethoxybenzaldehyde **2n** (196 mg, 2.0 equiv), Pd(OAc)<sub>2</sub> (11.4 mg, 10 mol%), NHPI (16.3 mg, 20 mol%), in 1,4-dioxane (1.0 mL), at 80 °C, under O<sub>2</sub> (1 atm), for 24 h, afforded 125 mg (73%) of **3an**. **3an**: white solid; <sup>1</sup>H NMR (400 MHz, CDCl<sub>3</sub>): δ 7.55-7.46 (m, 4 H), 6.99 (s, 2 H), 3.91 (s, 3 H), 3.81 (s, 6 H), 3.73 (s, 3 H), 2.05 (s, 3 H); <sup>13</sup>C NMR (100 MHz, CDCl<sub>3</sub>): δ 196.3, 154.2, 152.8, 142.1, 138.5, 136.5, 133.0, 130.1, 128.9, 128.4, 127.7, 107.0, 61.6, 60.8, 56.1, 14.7 ppm; HRMS *m/z* (ESI) calcd for C<sub>19</sub>H<sub>22</sub>NO<sub>5</sub> (M + H)<sup>+</sup> 344.14925, found 344.14874.

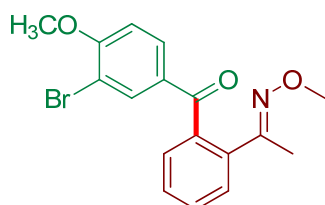

30):

**(3-Bromo-4-methoxyphenyl)(2-(1-(methoxyimino)ethyl)phenyl)methanone (3ao).**

The reaction of acetophenone *O*-methyl oxime **1a** (75 mg, 0.5 mmol), 3-bromo-4-methoxybenzaldehyde **2o** (214 mg, 2.0 equiv), Pd(OAc)<sub>2</sub> (11.4 mg, 10 mol%), NHPI (16.3 mg, 20 mol%), in 1,4-dioxane (1.0 mL), at 80 °C, under O<sub>2</sub> (1 atm), for 24 h, afforded 144 mg (80%) of **3ao**. **3ao**: white solid; <sup>1</sup>H NMR (400 MHz, CDCl<sub>3</sub>): δ 7.93 (d, *J* = 1.6 Hz, 1 H), 7.65 (dd, *J* = 2.0, 8.4 Hz, 1 H), 7.54-7.41 (m, 4 H), 6.87 (d, *J* = 8.4 Hz, 1 H), 3.93 (s, 3 H), 3.68 (s, 3 H), 2.05 (s, 3 H); <sup>13</sup>C NMR (100 MHz, CDCl<sub>3</sub>): δ 195.0, 159.0, 153.7, 138.2, 136.0, 134.4, 131.9, 130.3, 130.1, 128.6, 128.5, 127.6, 111.4, 110.7, 61.5, 56.3, 14.2 ppm; HRMS *m/z* (ESI) calcd for C<sub>17</sub>H<sub>17</sub>BrNO<sub>3</sub> (M + H)<sup>+</sup> 362.03863, found 362.03900.

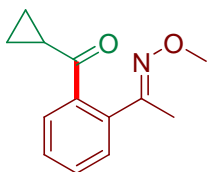

31):

**Cyclopropyl(2-(1-(methoxyimino)ethyl)phenyl)methanone (3ap)**. The reaction of acetophenone *O*-methyl oxime **1a** (75 mg, 0.5 mmol), cyclopropanecarbaldehyde **2p** (70 mg, 2.0 equiv), Pd(OAc)<sub>2</sub> (11.4 mg, 10 mol%), NHPI (16.3 mg, 20 mol%), in 1,4-dioxane (1.0 mL), at 80 °C, under O<sub>2</sub> (1 atm), for 24 h, afforded 59 mg (54%) of **3ap**. **3ap**: white solid; <sup>1</sup>H NMR (400 MHz, CDCl<sub>3</sub>): δ 7.51 (d, *J* = 7.2 Hz, 1 H), 7.39-7.32 (m, 3 H), 3.86 (s, 3 H), 2.19-2.14 (m, 1 H), 2.11 (s, 3 H), 1.18-1.13 (m, 2 H), 0.94-0.91 (m, 2 H); <sup>13</sup>C NMR (100 MHz, CDCl<sub>3</sub>): δ 204.8, 155.3, 140.4, 136.1, 130.5, 128.5, 128.3, 127.9, 61.7, 21.2, 15.4, 12.4 ppm; HRMS *m/z* (ESI) calcd for C<sub>13</sub>H<sub>16</sub>NO<sub>2</sub> (M + H)<sup>+</sup> 218.11756, found 218.11822.

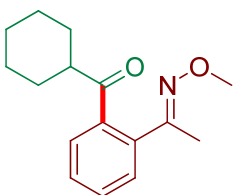

32):

**Cyclohexyl(2-(1-(methoxyimino)ethyl)phenyl)methanone (3aq)**.<sup>3</sup> The reaction of acetophenone *O*-methyl oxime **1a** (75 mg, 0.5 mmol), cyclohexanecarbaldehyde **2q** (112 mg, 2.0 equiv), Pd(OAc)<sub>2</sub> (11.4 mg, 10 mol%), NHPI (16.3 mg, 20 mol%), in 1,4-dioxane (1.0 mL), at 80 °C, under O<sub>2</sub> (1 atm), for 24 h, afforded 46 mg (36%) of **3aq**. **3aq**: white solid; <sup>1</sup>H NMR (400 MHz, CDCl<sub>3</sub>): δ 7.39-7.31 (m, 4 H), 3.85 (s, 3 H), 2.73-2.67 (m, 1 H), 2.12 (s, 3 H), 1.78-1.71 (m, 4 H), 1.40-1.32 (m, 2 H), 1.23-1.11 (m, 4 H); <sup>13</sup>C NMR (100 MHz, CDCl<sub>3</sub>): δ 208.4, 155.5, 139.6, 135.9, 130.1, 128.4, 128.3, 127.9, 61.8, 49.5, 29.1, 25.9, 25.8, 15.1 ppm; MS (70 ev): *m/z* (%): 104.1 (15), 176.1 (100), 259.1 (M<sup>+</sup>, 1).

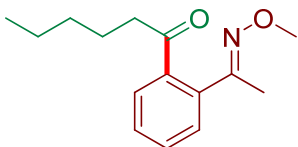

33):

**1-(2-(1-(Methoxyimino)ethyl)phenyl)hexan-1-one (3ar).** The reaction of acetophenone *O*-methyl oxime **1a** (75 mg, 0.5 mmol), hexanal **2r** (100 mg, 2.0 equiv), Pd(OAc)<sub>2</sub> (11.4 mg, 10 mol%), NHPI (16.3 mg, 20 mol%), in 1,4-dioxane (1.0 mL), at 80 °C, under O<sub>2</sub> (1 atm), for 24 h, afforded 40 mg (33%) of **3ar**. **3ar**: white solid; <sup>1</sup>H NMR (400 MHz, CDCl<sub>3</sub>): δ 7.50-7.44 (m, 2 H), 7.42-7.38 (m, 2 H), 3.92 (s, 3 H), 2.76 (t, *J* = 7.2 Hz, 2 H), 2.19 (s, 3 H), 1.71-1.64 (m, 2 H), 1.35-1.28 (m, 4 H), 0.89 (t, *J* = 7.2 Hz, 3 H); <sup>13</sup>C NMR (100 MHz, CDCl<sub>3</sub>): δ 205.1, 155.7, 139.9, 135.9, 130.4, 128.6, 128.4, 127.7, 61.7, 42.1, 31.4, 24.1, 22.4, 15.2, 13.8 ppm; MS (70 ev): *m/z* (%): 104.1 (15), 176.1 (100), 216.1 (20), 247.2 (M<sup>+</sup>, 1).

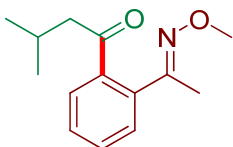

34):

**1-(2-(1-(Methoxyimino)ethyl)phenyl)-3-methylbutan-1-one (3as).** The reaction of acetophenone *O*-methyl oxime **1a** (75 mg, 0.5 mmol), 3-methylbutanal **2s** (86 mg, 2.0 equiv), Pd(OAc)<sub>2</sub> (11.4 mg, 10 mol%), NHPI (16.3 mg, 20 mol%), in 1,4-dioxane (1.0 mL), at 80 °C, under O<sub>2</sub> (1 atm), for 24 h, afforded 50 mg (43%) of **3as**. **3as**: white solid; <sup>1</sup>H NMR (400 MHz, CDCl<sub>3</sub>): δ 7.53 (d, *J* = 7.6 Hz, 1 H), 7.49-7.36 (m, 3 H), 3.92 (s, 3 H), 2.68 (d, *J* = 6.8 Hz, 2 H), 2.25-2.15-1.71 (m, 1 H), 2.19 (s, 3 H), 0.96 (d, *J* = 6.8 Hz, 6 H); <sup>13</sup>C NMR (100 MHz, CDCl<sub>3</sub>): δ 204.2, 156.0, 139.9, 136.2, 130.6, 128.6, 128.5, 127.9, 61.7, 50.7, 25.0, 22.6, 15.6 ppm; MS (70 ev): *m/z* (%): 176.1 (100), 202.1 (15), 232.2 (M<sup>+</sup>, 1).

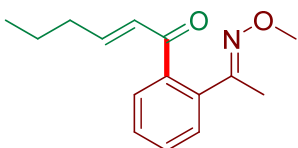

35):

**1-(2-(1-(Methoxyimino)ethyl)phenyl)hex-2-en-1-one (3at).**<sup>3</sup> The reaction of acetophenone *O*-methyl oxime **1a** (75 mg, 0.5 mmol), hex-2-enal **2t** (98 mg, 2.0 equiv), Pd(OAc)<sub>2</sub> (11.4 mg, 10 mol%), NHPI (16.3 mg, 20 mol%), in 1,4-dioxane (1.0 mL), at 80 °C, under O<sub>2</sub> (1 atm), for 24 h, afforded 39 mg (32%) of **3at**. **3at**: white solid; <sup>1</sup>H NMR (400 MHz, CDCl<sub>3</sub>): δ 7.49-7.39 (m, 4 H), 6.68-6.60 (m, 1 H), 6.38-6.34 (m, 1 H), 3.90 (s, 3 H), 2.22-2.17 (m, 2 H), 2.13 (s, 3 H), 1.52-1.45 (m, 2 H), 0.93 (t, *J* = 8.4 Hz, 3 H); <sup>13</sup>C NMR (100 MHz, CDCl<sub>3</sub>): δ 196.0, 155.1, 149.4, 139.2, 136.0, 130.7, 130.2, 128.5, 128.1, 61.7, 34.5, 21.3, 15.3, 13.6 ppm; MS (70 ev): *m/z* (%): 77.1 (20), 160.1 (40), 214.1 (100), 245.1 (M<sup>+</sup>, 1).

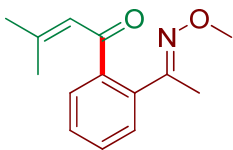

36):

**1-(2-(1-(Methoxyimino)ethyl)phenyl)-3-methylbut-2-en-1-one (3au).** The reaction of acetophenone *O*-methyl oxime **1a** (75 mg, 0.5 mmol), 3-methylbut-2-enal **2u** (98 mg, 2.0 equiv), Pd(OAc)<sub>2</sub> (11.4 mg, 10 mol%), NHPI (16.3 mg, 20 mol%), in 1,4-dioxane (1.0 mL), at 80 °C, under O<sub>2</sub> (1 atm), for 24 h, afforded 43 mg (38%) of **3au**. **3au**: white solid; <sup>1</sup>H NMR (400 MHz, CDCl<sub>3</sub>): δ 7.56-7.53 (m, 1 H), 7.47-7.37 (m, 3 H), 6.34-6.33 (m, 1 H), 3.91 (s, 3 H), 2.16 (s, 3 H), 2.14 (s, 3 H), 1.94 (s, 3 H); <sup>13</sup>C NMR (100 MHz, CDCl<sub>3</sub>): δ 194.6, 156.0, 155.5, 141.1, 136.5, 130.3, 128.6, 128.5, 128.2, 124.4, 61.7, 27.7, 20.9, 15.9 ppm; MS (70 ev): m/z (%): 77.1 (20), 172.1 (25), 200.1 (100), 231.1 (M<sup>+</sup>, 1).

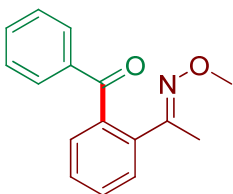

37):

**(2-(1-(Methoxyimino)ethyl)phenyl)(phenyl)methanone (5aa/3aa).**<sup>2</sup> The reaction of acetophenone *O*-methyl oxime **1a** (75 mg, 0.5 mmol), phenylmethanol **4a** (108 mg, 2.0 equiv), Pd(OAc)<sub>2</sub> (11.4 mg, 10 mol%), NHPI (16.3 mg, 20 mol%), in 1,4-dioxane (1.0 mL), at 80 °C, under O<sub>2</sub> (1 atm), for 24 h, afforded 63 mg (50%) of **5aa**. **5aa**: white solid; <sup>1</sup>H NMR (400 MHz, CDCl<sub>3</sub>): δ 7.71 (d, *J* = 8.8 Hz, 2 H), 7.55-7.47 (m, 5 H), 7.40 (t, *J* = 7.6 Hz, 2 H), 3.67 (s, 3 H), 2.02 (s, 3 H); <sup>13</sup>C NMR (100 MHz, CDCl<sub>3</sub>): δ 197.5, 153.9, 138.7, 138.1, 136.3, 132.4, 130.1, 129.2, 128.9, 128.5, 128.2, 127.6, 61.6, 14.3 ppm; MS (70 ev): m/z (%): 77.0 (20), 222.0 (100), 253.0 (M<sup>+</sup>, 10).

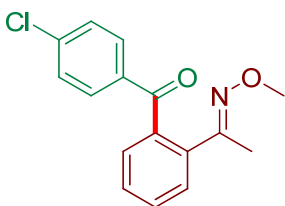

38):

**(4-Chlorophenyl)(2-(1-(methoxyimino)ethyl)phenyl)methanone (5ab/3ad).**<sup>2</sup> The reaction of acetophenone *O*-methyl oxime **1a** (75 mg, 0.5 mmol), (4-chlorophenyl)methanol **4b** (142 mg, 2.0 equiv), Pd(OAc)<sub>2</sub> (11.4 mg, 10 mol%), NHPI (16.3 mg, 20 mol%), in 1,4-dioxane (1.0 mL), at 80 °C, under O<sub>2</sub> (1 atm), for 24 h, afforded 102 mg (71%) of **5ab**. **5ab**: white solid; <sup>1</sup>H NMR (400 MHz, CDCl<sub>3</sub>): δ 7.54 (d, *J* = 8.4 Hz, 2 H), 7.43-7.32 (m, 4 H), 7.26 (d, *J* = 8.4 Hz, 2 H), 3.56 (s, 3 H), 1.94 (s, 3 H); <sup>13</sup>C NMR (100

MHz, CDCl<sub>3</sub>):  $\delta$  196.1, 153.5, 138.6, 138.2, 136.5, 135.9, 130.4, 130.2, 128.6, 128.5, 128.4, 127.5, 61.5, 14.0 ppm; MS (70 ev):  $m/z$  (%): 256.0 (100), 287.0 (M<sup>+</sup>, 5).

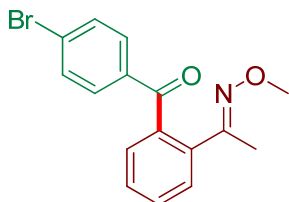

39):

**(4-Bromophenyl)(2-(1-(methoxyimino)ethyl)phenyl)methanone (5ac).**<sup>2</sup> The reaction of acetophenone *O*-methyl oxime **1a** (75 mg, 0.5 mmol), (4-bromophenyl)methanol **4c** (186 mg, 2.0 equiv), Pd(OAc)<sub>2</sub> (11.4 mg, 10 mol%), NHPI (16.3 mg, 20 mol%), in 1,4-dioxane (1.0 mL), at 80 °C, under O<sub>2</sub> (1 atm), for 24 h, afforded 94 mg (57%) of **5ac**. **5ac**: white solid; <sup>1</sup>H NMR (400 MHz, CDCl<sub>3</sub>):  $\delta$  7.58-7.51 (m, 6 H), 7.44 (t, *J* = 6.0 Hz, 2 H), 3.66 (s, 3 H), 2.05 (s, 3 H); <sup>13</sup>C NMR (100 MHz, CDCl<sub>3</sub>):  $\delta$  196.4, 153.6, 138.3, 137.0, 136.1, 131.5, 130.6, 130.3, 128.8, 128.7, 127.6, 127.5, 61.7, 14.1 ppm; MS (70 ev):  $m/z$  (%): 76.1 (40), 286.1 (30), 300.1 (100), 331.1 (M<sup>+</sup>, 10).

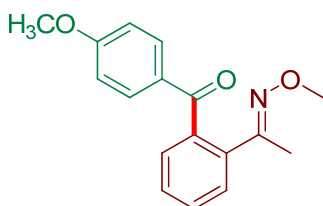

40):

**(2-(1-(Methoxyimino)ethyl)phenyl)(4-methoxyphenyl)methanone (5ad).**<sup>2</sup> The reaction of acetophenone *O*-methyl oxime **1a** (75 mg, 0.5 mmol), (4-methoxyphenyl)methanol **4d** (138 mg, 2.0 equiv), Pd(OAc)<sub>2</sub> (11.4 mg, 10 mol%), NHPI (16.3 mg, 20 mol%), in 1,4-dioxane (1.0 mL), at 80 °C, under O<sub>2</sub> (1 atm), for 24 h, afforded 74 mg (52%) of **5ad**. **5ad**: white solid; <sup>1</sup>H NMR (400 MHz, CDCl<sub>3</sub>):  $\delta$  7.71 (d, *J* = 8.8 Hz, 2 H), 7.50-7.48 (m, 2 H), 7.44-7.42 (m, 2 H), 6.88 (d, *J* = 8.8 Hz, 2 H), 3.85 (s, 3 H), 3.69 (s, 3 H), 2.04 (s, 3 H); <sup>13</sup>C NMR (100 MHz, CDCl<sub>3</sub>):  $\delta$  196.3, 163.1, 154.1, 139.0, 136.2, 131.7, 130.9, 129.8, 128.6, 128.3, 127.7, 113.4, 61.6, 55.3, 14.6 ppm; MS (70 ev):  $m/z$  (%): 77.0 (15), 252.0 (100), 283.0 (M<sup>+</sup>, 10).

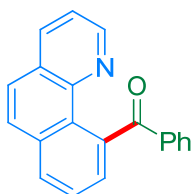

41):

**Benzo[h]quinolin-10-yl(phenyl)methanone (7aa).**<sup>2</sup> The reaction of benzo[h]quinoline

**6a** (75 mg, 0.5 mmol), benzaldehyde **2a** (106 mg, 2.0 equiv), Pd(OAc)<sub>2</sub> (11.4 mg, 10 mol%), NHPI (16.3 mg, 20 mol%), in dioxane (1.0 mL), at 80 °C, under O<sub>2</sub> (1 atm), for 24 h, afforded 116 mg (82%) of **7aa**. **7aa**: white solid; <sup>1</sup>H NMR (400 MHz, CDCl<sub>3</sub>): δ 8.45 (d, *J* = 2.8 Hz, 1 H), 7.99 (t, *J* = 8.4 Hz, 2 H), 7.82 (d, *J* = 8.8 Hz, 1 H), 7.75-7.71 (m, 3 H), 7.65 (d, *J* = 8.8 Hz, 1 H), 7.60 (d, *J* = 7.2 Hz, 1 H), 7.36 (t, *J* = 7.2 Hz, 1 H), 7.27-7.22 (m, 3 H); <sup>13</sup>C NMR (100 MHz, CDCl<sub>3</sub>): δ 198.4, 146.9, 144.4, 139.1, 138.7, 135.1, 133.6, 131.5, 128.9, 128.8, 128.5, 127.9, 127.6, 127.5, 126.8, 126.2, 125.9, 121.5 ppm; MS (70 ev): *m/z* (%): 77.0 (15), 206.0 (70), 254.0 (100), 283.0 (M<sup>+</sup>, 30).

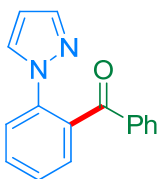

42):

**(2-(1H-Pyrazol-1-yl)phenyl)(phenyl)methanone (7ba)**.<sup>6</sup> The reaction of 1-phenyl-1H-pyrazole **6b** (72 mg, 0.5 mmol), benzaldehyde **2a** (106 mg, 2.0 equiv), Pd(OAc)<sub>2</sub> (11.4 mg, 10 mol%), NHPI (16.3 mg, 20 mol%), in dioxane (1.0 mL), at 80 °C, under O<sub>2</sub> (1 atm), for 24 h, afforded 74 mg (60%) of **7ba**. **7ba**: white solid; <sup>1</sup>H NMR (400 MHz, CDCl<sub>3</sub>): δ 7.64-7.55 (m, 6 H), 7.48-7.38 (m, 3 H), 7.27 (t, *J* = 7.6 Hz, 2 H), 6.16 (t, *J* = 2.0 Hz, 1 H); <sup>13</sup>C NMR (100 MHz, CDCl<sub>3</sub>): δ 195.7, 141.1, 138.5, 136.6, 133.7, 132.7, 131.1, 129.6, 129.4, 128.9, 128.0, 127.3, 123.1, 107.5 ppm; MS (70 ev): *m/z* (%): 77.1 (30), 171.1 (20), 219.1 (100), 248.1 (M<sup>+</sup>, 5).

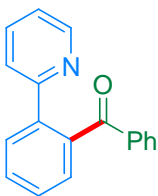

43):

**Phenyl(2-(pyridin-2-yl)phenyl)methanone (7ca)**.<sup>2</sup> The reaction of 2-phenylpyridine **6c** (78 mg, 0.5 mmol), benzaldehyde **2a** (106 mg, 2.0 equiv), Pd(OAc)<sub>2</sub> (11.4 mg, 10 mol%), NHPI (16.3 mg, 20 mol%), in dioxane (1.0 mL), at 100 °C, under O<sub>2</sub> (1 atm), for 24 h, afforded 114 mg (88%) of **7ca**. **7ca**: white solid; <sup>1</sup>H NMR (400 MHz, CDCl<sub>3</sub>): δ 8.35 (d, *J* = 4.8 Hz, 1 H), 7.76 (d, *J* = 7.6 Hz, 1 H), 7.68 (d, *J* = 7.2 Hz, 2 H), 7.62-7.56 (m, 1 H), 7.55-7.47 (m, 4 H), 7.37 (t, *J* = 7.2 Hz, 1 H), 7.25 (t, *J* = 7.6 Hz, 2 H), 7.01-6.98 (m, 1 H); <sup>13</sup>C NMR (100 MHz, CDCl<sub>3</sub>): δ 198.1, 156.7, 149.0, 139.6, 139.4, 137.8, 136.2, 132.2, 130.1, 129.4, 129.0, 128.7, 128.4, 127.9, 122.6, 121.8 ppm; MS (70 ev): *m/z* (%): 77.0 (15), 182.0 (100), 230.0 (50), 259.0 (M<sup>+</sup>, 5).



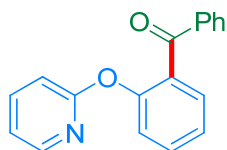

44):

**Phenyl(2-(pyridin-2-yloxy)phenyl)methanone (7da).**<sup>2</sup> The reaction of 2-phenoxy pyridine **6d** (86 mg, 0.5 mmol), benzaldehyde **2a** (106 mg, 2.0 equiv), Pd(OAc)<sub>2</sub> (11.4 mg, 10 mol%), NHPI (16.3 mg, 20 mol%), in dioxane (1.0 mL), at 100 °C, under O<sub>2</sub> (1 atm), for 24 h, afforded 75 mg (55%) of **7da**. **7da**: white solid; <sup>1</sup>H NMR (400 MHz, CDCl<sub>3</sub>): δ 8.00 (d, *J* = 4.8 Hz, 1 H), 7.75 (d, *J* = 7.2 Hz, 2 H), 7.57-7.43 (m, 4 H), 7.33-7.25 (m, 4 H), 6.87-6.84 (m, 1 H), 6.59 (d, *J* = 8.4 Hz, 1 H); <sup>13</sup>C NMR (100 MHz, CDCl<sub>3</sub>): δ 195.2, 162.8, 151.5, 146.9, 139.2, 137.4, 132.7, 132.1, 132.0, 130.2, 129.7, 127.9, 124.6, 122.6, 118.4, 111.4 ppm; MS (70 ev): *m/z* (%): 77.0 (20), 170.0 (100), 198.0 (20), 275.0 (M<sup>+</sup>, 1).

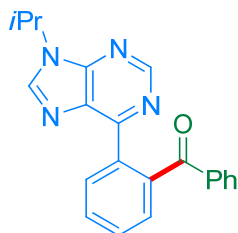

45):

**(2-(9-Isopropyl-9H-purin-6-yl)phenyl)(phenyl)methanone (7ea).** The reaction of 9-isopropyl-6-phenyl-9H-purine **6e** (120 mg, 0.5 mmol), benzaldehyde **2a** (106 mg, 2.0 equiv), Pd(OAc)<sub>2</sub> (11.4 mg, 10 mol%), NHPI (16.3 mg, 20 mol%), in dioxane (1.0 mL), at 100 °C, under O<sub>2</sub> (1 atm), for 24 h, afforded 156 mg (91%) of **7ea**. **7ea**: white solid; <sup>1</sup>H NMR (400 MHz, CDCl<sub>3</sub>): δ 8.66 (s, 1 H), 8.61 (d, *J* = 7.6 Hz, 1 H), 8.13 (s, 1 H), 7.71-7.67 (m, 3 H), 7.61 (d, *J* = 4.0 Hz, 2 H), 7.35 (t, *J* = 7.2 Hz, 1 H), 7.23 (t, *J* = 8.0 Hz, 2 H), 4.92-4.82 (m, 1 H), 1.59 (d, *J* = 6.8 Hz, 6 H); <sup>13</sup>C NMR (100 MHz, CDCl<sub>3</sub>): δ 197.4, 154.4, 151.5, 151.1, 142.2, 140.3, 138.0, 135.1, 131.9, 131.6, 131.4, 130.0, 129.9, 129.2, 129.0, 127.7, 47.1, 22.3 ppm; HRMS *m/z* (ESI) calcd for C<sub>21</sub>H<sub>19</sub>N<sub>4</sub>O (M + H)<sup>+</sup> 343.15534, found 343.15540.

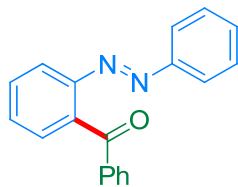

46):

**Phenyl(2-(phenyldiazenyl)phenyl)methanone (7fa).**<sup>7</sup> The reaction of 1,2-diphenyldiazene **6f** (92 mg, 0.5 mmol), benzaldehyde **2a** (106 mg, 2.0 equiv), Pd(OAc)<sub>2</sub> (11.4 mg, 10 mol%), NHPI (16.3 mg, 20 mol%), in dioxane (1.0 mL), at 80 °C, under O<sub>2</sub> (1 atm), for 24 h, afforded 39 mg (27%) of **7fa**. **7fa**: orange solid; <sup>1</sup>H NMR (400 MHz, CDCl<sub>3</sub>): δ 10.73 (s, 1 H), 8.55 (d, *J* = 8.4 Hz, 1 H), 7.62 (d, *J* = 7.6 Hz, 2 H),

7.54-7.46 (m, 3 H), 7.41 (t,  $J = 7.2$  Hz, 2 H), 7.00 (t,  $J = 7.6$  Hz, 1 H), 2.14 (s, 3 H);  $^{13}\text{C}$  NMR (100 MHz,  $\text{CDCl}_3$ ):  $\delta$  199.7, 169.1, 140.4, 138.6, 134.2, 133.4, 132.4, 129.8, 128.2, 123.2, 122.0, 121.4, 25.2 ppm; MS (70 ev):  $m/z$  (%): 77.1 (100), 105.1 (30), 152.1 (50), 286.1 ( $\text{M}^+$ , 60).

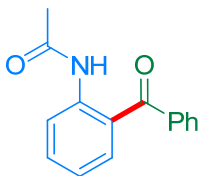

47):

***N*-(2-Benzoylphenyl)acetamide (7ga)**.<sup>8</sup> The reaction of *N*-phenylacetamide **6g** (68 mg, 0.5 mmol), benzaldehyde **2a** (106 mg, 2.0 equiv),  $\text{Pd}(\text{OAc})_2$  (11.4 mg, 10 mol%), NHPI (16.3 mg, 20 mol%), in dioxane (1.0 mL), at 80 °C, under  $\text{O}_2$  (1 atm), for 24 h, afforded 13 mg (11%) of **7ga**. **7ga**: white solid;  $^1\text{H}$  NMR (400 MHz,  $\text{CDCl}_3$ ):  $\delta$  7.64-7.55 (m, 6 H), 7.48-7.38 (m, 3 H), 7.27 (t,  $J = 7.6$  Hz, 2 H), 6.16 (t,  $J = 2.0$  Hz, 1 H);  $^{13}\text{C}$  NMR (100 MHz,  $\text{CDCl}_3$ ):  $\delta$  195.7, 141.1, 138.5, 136.6, 133.7, 132.7, 131.1, 129.6, 129.4, 128.9, 128.0, 127.3, 123.1, 107.5 ppm; MS (70 ev):  $m/z$  (%): 77.0 (15), 120.0 (15), 196.1 (100), 239.0 ( $\text{M}^+$ , 15).

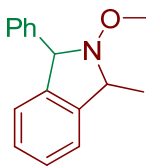

48):

**2-Methoxy-1-methyl-3-phenylisoindoline (8)**.  $\text{NaBH}_4$  (95 mg, 5.0 equiv) is added to a solution of  $\text{ZrCl}_4$  (146 mg, 1.25 equiv) in THF (1 mL) at room temperature under nitrogen. Immediate gas evolution is observed upon mixing the reagents, and a cream colored suspension is obtained. A solution of (2-(1-(methoxyimino)ethyl)phenyl)(phenyl)methanone **3aa** (127 mg, 0.5 mmol) in THF (0.5 mL) is added to the above mixture and is stirred for 5 h at room temperature. Then the reaction is quenched by the addition of 28% aqueous ammonia to pH 9 and extracted with EtOAc (3\*5 mL). The extract is dried by  $\text{MgSO}_4$ , and evaporated. The crude product is purified by column chromatography on silica gel (eluent: petroleum ether / ethyl acetate = 50:1) to yield 102 mg (85%) of **8**. **8**: colorless liquid;  $^1\text{H}$  NMR (400 MHz,  $\text{CDCl}_3$ ):  $\delta$  7.46 (d,  $J = 7.2$  Hz, 2 H), 7.38-7.29 (m, 3 H), 7.24 (t,  $J = 7.6$  Hz, 1 H), 7.14 (t,  $J = 8.4$  Hz, 2 H), 6.70 (d,  $J = 7.6$  Hz, 1 H), 5.03 (s, 1 H), 4.22 (q,  $J = 6.4$  Hz, 1 H), 3.41 (s, 3 H), 1.61 (d,  $J = 6.4$  Hz, 3 H);  $^{13}\text{C}$  NMR (100 MHz,  $\text{CDCl}_3$ ):  $\delta$  141.3, 141.0, 140.7, 129.0, 128.2, 127.7, 127.6, 127.4, 122.9, 121.2, 75.1, 66.0, 63.6, 17.9 ppm; HRMS  $m/z$  (ESI) calcd for  $\text{C}_{16}\text{H}_{18}\text{NO}$  ( $\text{M} + \text{H}$ )<sup>+</sup> 240.13829, found 240.13868.

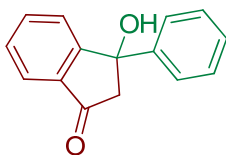

49):

**3-Hydroxy-3-phenylindanone (9).**<sup>8</sup> **1) Removal of oxime directing group:**<sup>9</sup> the acylation product **3aa** (506 mg, 2 mmol) was added to a mixture of dioxane (1 mL) and 6 M HCl (1 mL) in an 25-mL vial with a Teflon lined cap. Then the mixture was heated to 80 °C for 2 h. After cooling to room temperature, the reaction mixture was filtered through Celite, and the filtrate was concentrated under vacuum. The crude product is purified by column chromatography on silica gel (eluent: petroleum ether / ethyl acetate = 10:1) to yield 246 mg (55%) of 1-(2-benzoylphenyl)ethanone. **2) Intramolecular aldolization:**<sup>8</sup> 1-(2-benzoylphenyl)ethanone (1 mmol, 224 mg) was taken in a round bottom flask and dissolved in DMSO (3 mL), 0.05 mmol (0.004 mL) of freshly prepared 50% aqueous NaOH (2.5 g in 5 mL distilled water) was added and stirred at room temperature for 2 min. And then 10 mL water was added to it and product was extracted with ethyl acetate (10 mL\*3). Combined organic layer was washed with water and brine solution and dried over anhydrous Na<sub>2</sub>SO<sub>4</sub>. Ethyl acetate was evaporated and the crude product is purified by column chromatography on silica gel (eluent: petroleum ether / ethyl acetate = 5:1) to yield 208 mg (93%) of **9**. **9**: brown solid; <sup>1</sup>H NMR (400 MHz, CDCl<sub>3</sub>): δ 7.74 (d, *J* = 7.6 Hz, 1 H), 7.62 (t, *J* = 7.2 Hz, 1 H), 7.47 (t, *J* = 7.6 Hz, 1 H), 7.40 (d, *J* = 7.6 Hz, 1 H), 7.32-7.63 (m, 5 H), 3.14 (brs, 1 H), 3.12 (s, 2 H); <sup>13</sup>C NMR (100 MHz, CDCl<sub>3</sub>): δ 203.7, 158.2, 145.2, 135.8, 135.7, 129.4, 128.4, 127.3, 125.1, 125.0, 123.1, 78.3, 56.0 ppm; MS (70 ev): *m/z* (%): 77.1 (60), 133.0 (70), 178.1 (60), 195.1 (70), 224.1 (M<sup>+</sup>, 100).

## References:

- (1) (a) T.-J. Gong, B. Xiao, W.-M. Cheng, W. Su, J. Xu, Z.-J. Liu, L. Liu and Y. Fu, *J. Am. Chem. Soc.*, 2013, **135**, 10630; (b) S. E. Booth, P. R. Jenkins, C. J. Swain and J. B. Sweeney, *J. Chem. Soc. Perkin Trans., I* 1994, 3499.
- (2) Y.-F. Liang, X. Li, X. Wang, Y. Yan, P. Feng and N. Jiao, *ACS Catal.*, 2015, **5**, 1956.
- (3) Y. Yang, B. Zhou and Y. Li, *Adv. Synth. Catal.*, 2012, **354**, 2916
- (4) M. Kim, J. Park, S. Sharma, A. Kim, E. Park, J. H. Kwak, Y. H. Jung and I. S. Kim, *Chem. Commun.*, 2013, **49**, 925.
- (5) S. Sharma, M. Kim, J. Park, M. Kim, J. H. Kwak, Y. H. Jung, J. S. Oh, Y. Lee and I. S. Kim, *Eur. J. Org. Chem.*, 2013, 6656.
- (6) S. Han, S. Sharma, J. Park, M. Kim, Y. Shin, N. K. Mishra, J. J. Bae, J. H. Kwak, Y. H. Jung and I. S. Kim, *J. Org. Chem.*, 2014, **79**, 275.
- (7) H. Song, D. Chen, C. Pi, X. Cui and Y. Wu, *J. Org. Chem.*, 2014, **79**, 2955.
- (8) T. Chanda, S. Chowdhury, B. J. Ramulu, S. Koley, R. C. F. Jones and M. S. Singh, *Tetrahedron*, 2014, **70**, 2190.
- (9) C.-W. Chan, Z. Zhou, A. S. C. Chan and W.-Y. Yu, *Org. Lett.*, 2010, **12**, 3926

7.718  
7.696  
7.536  
7.521  
7.519  
7.516  
7.508  
7.505  
7.489  
7.476  
7.470  
7.419  
7.400  
7.381  
7.260

3.675

2.027

-0.000

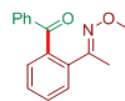

3aa

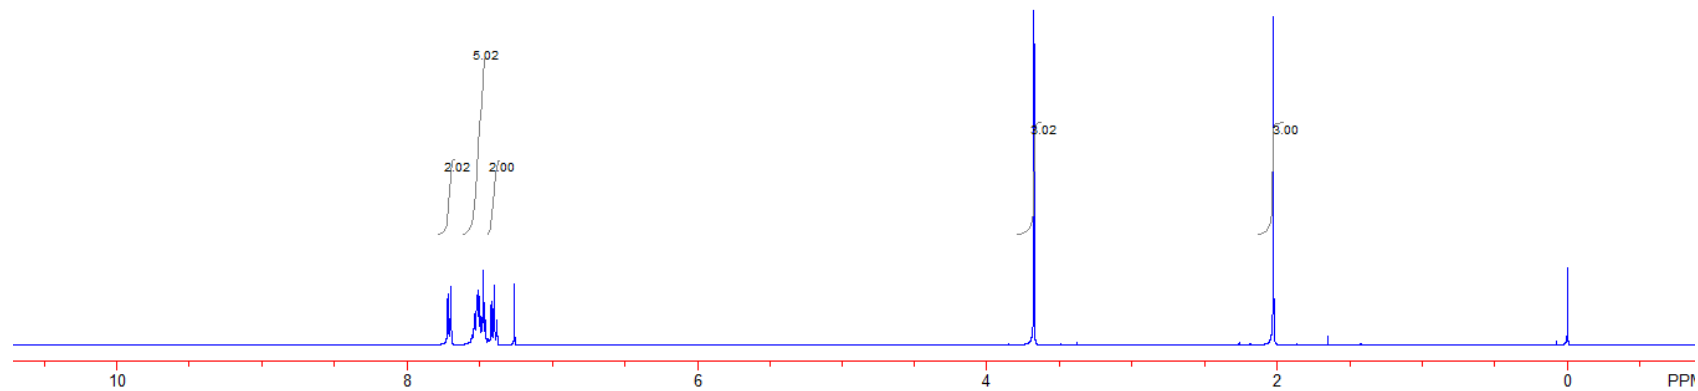

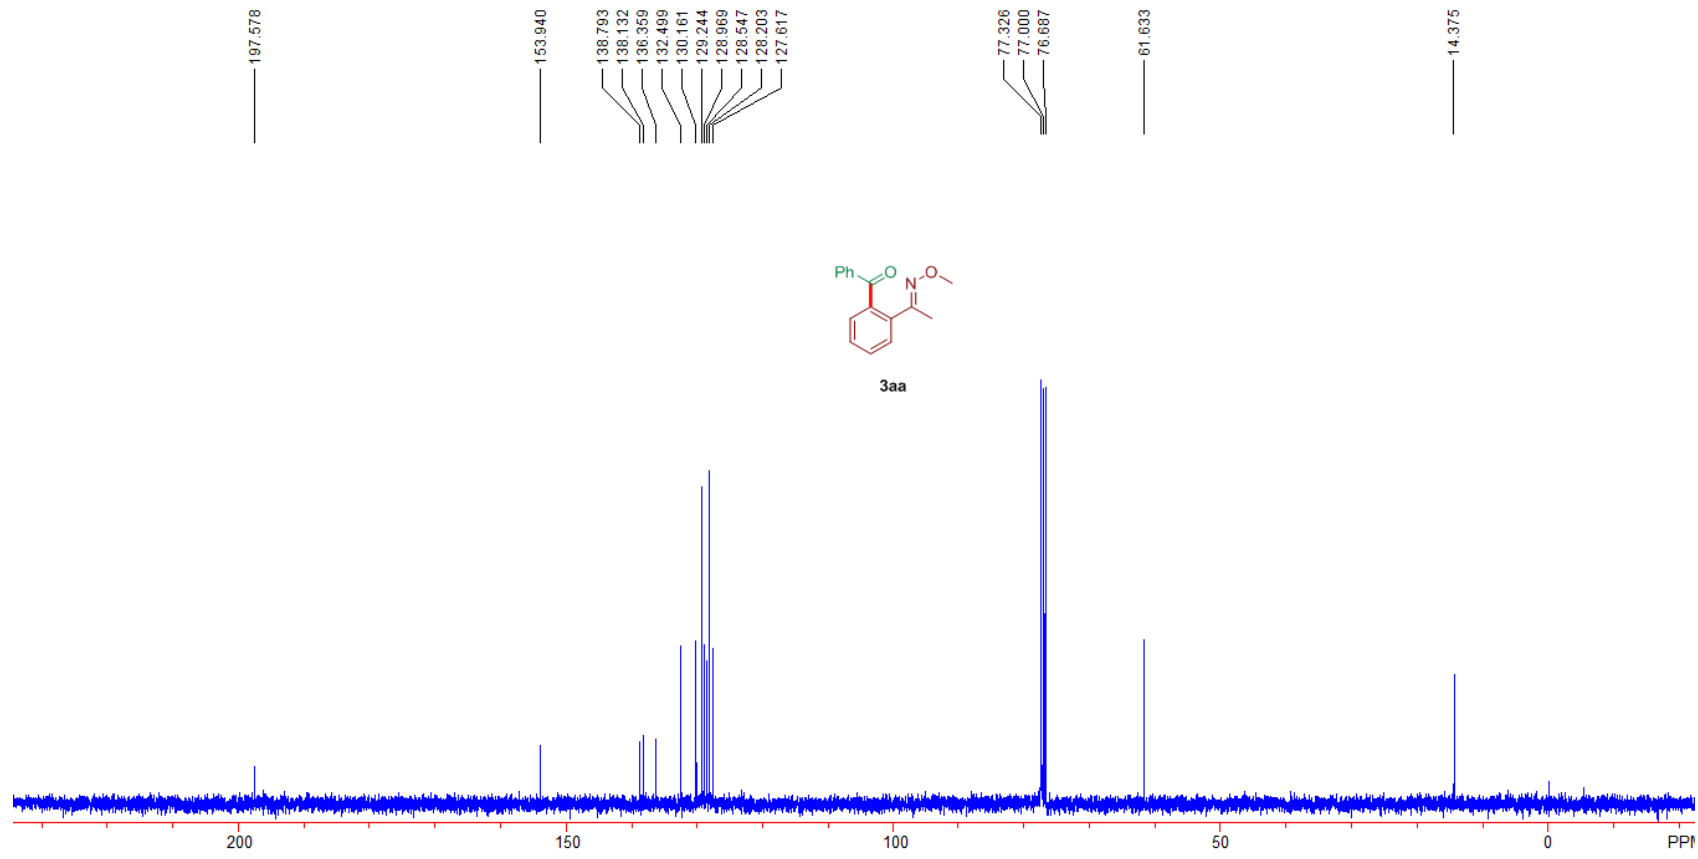

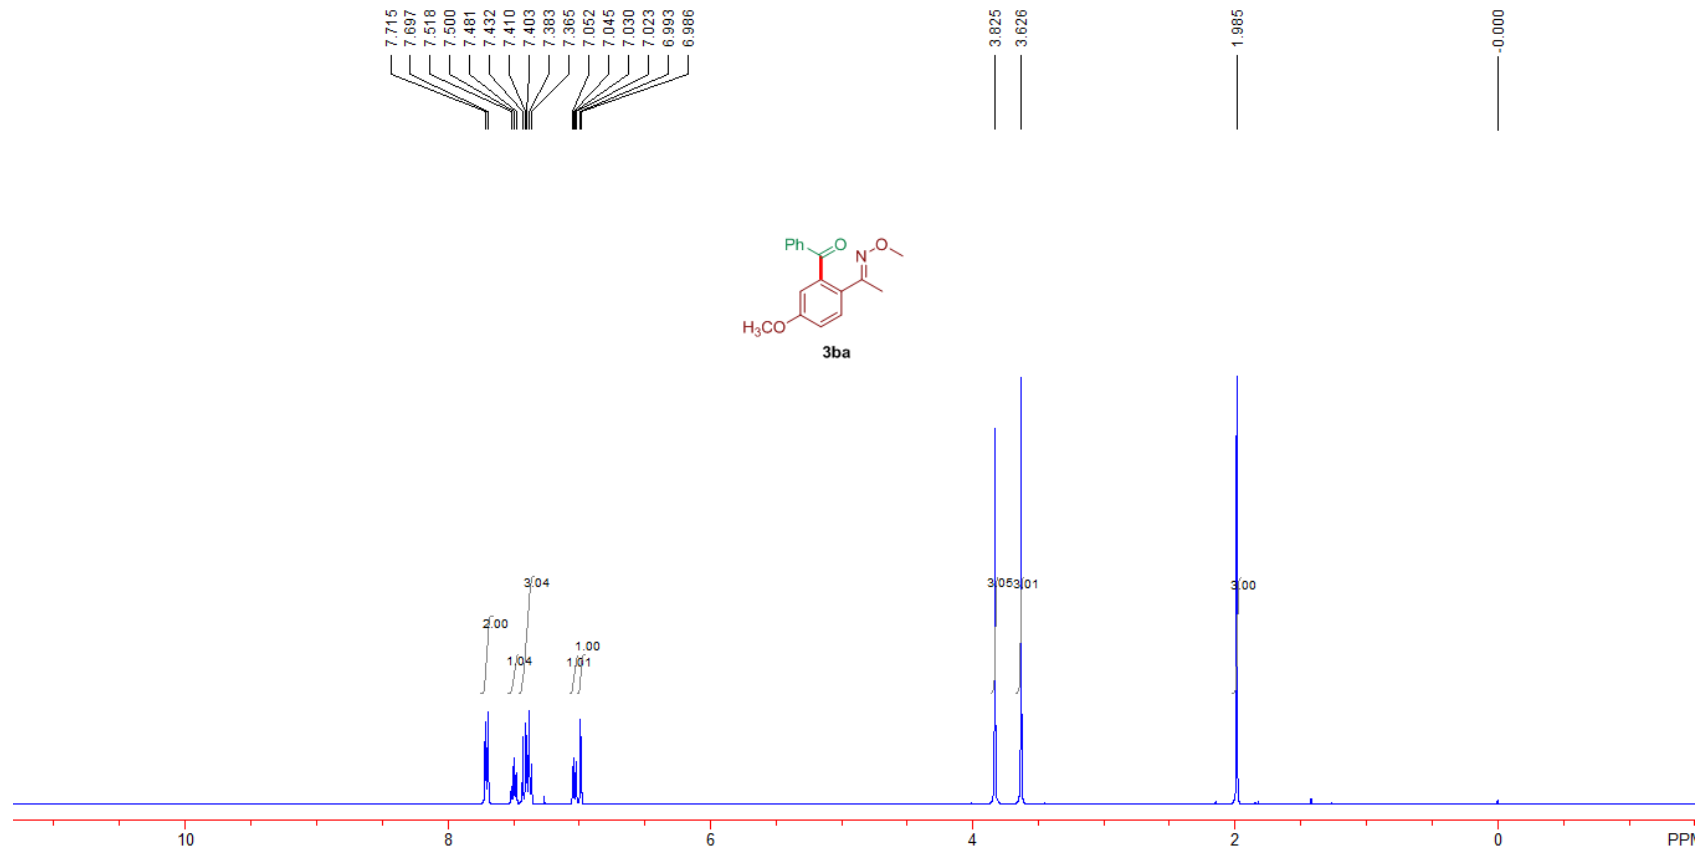

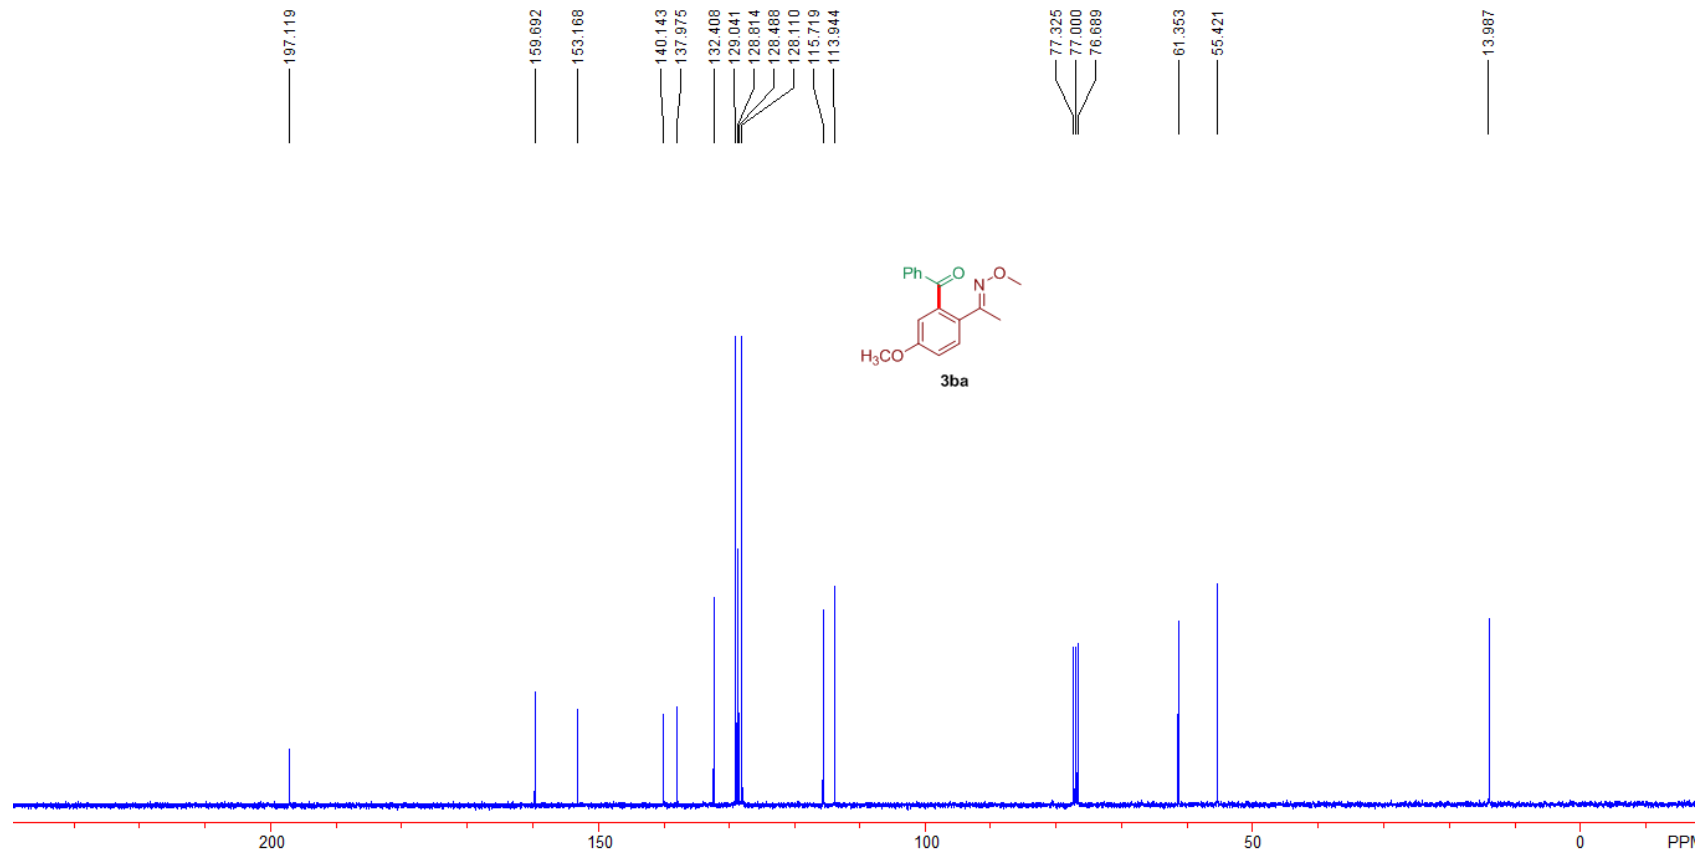

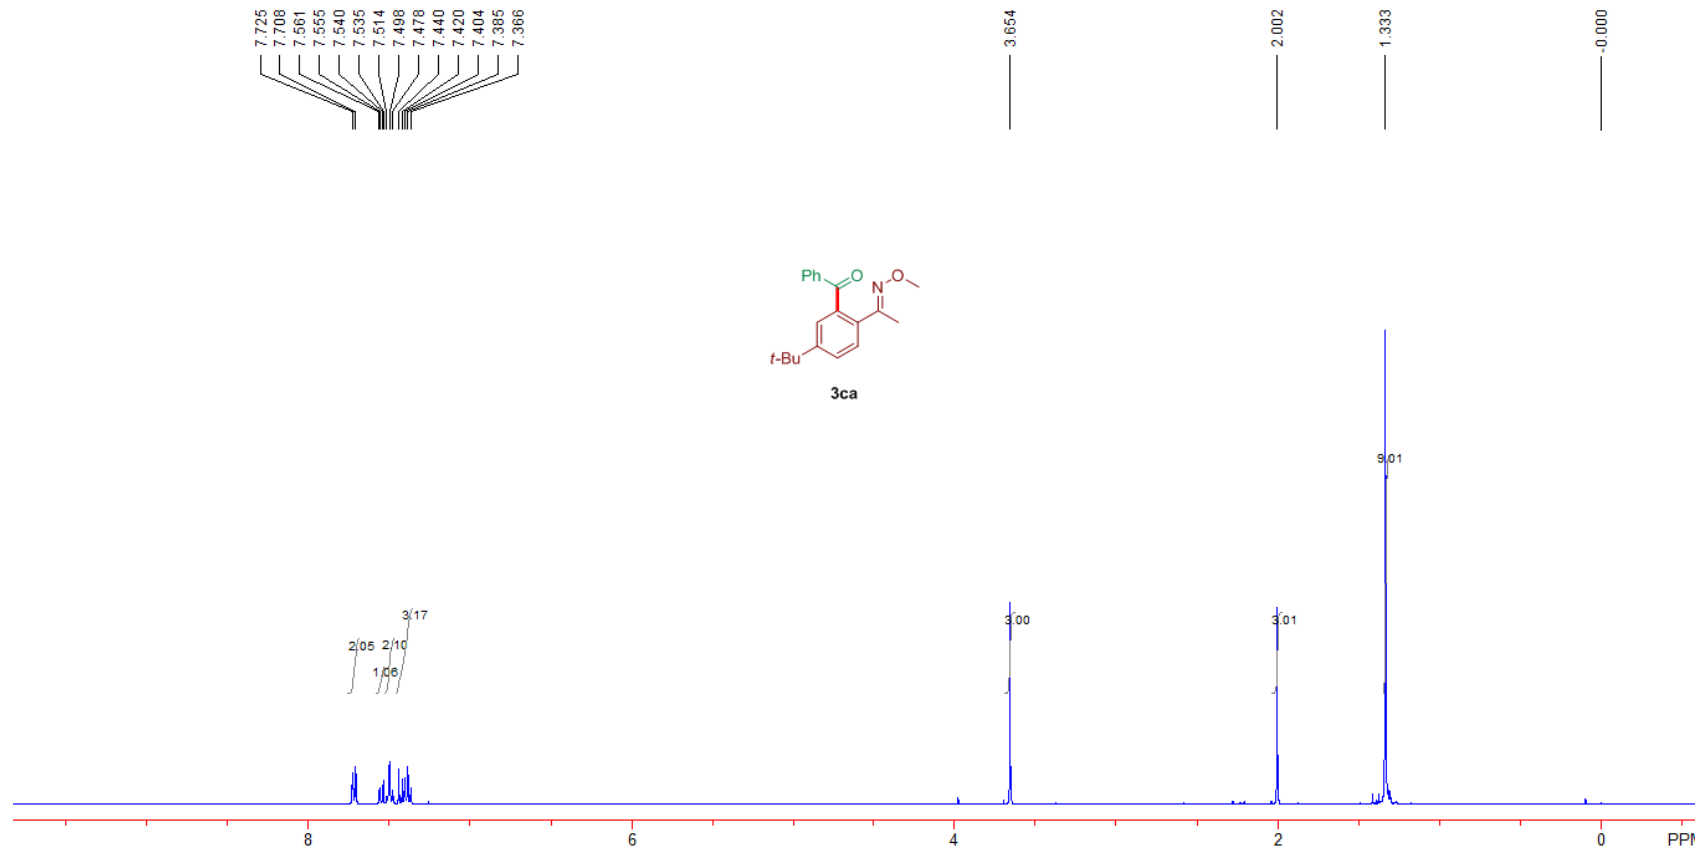



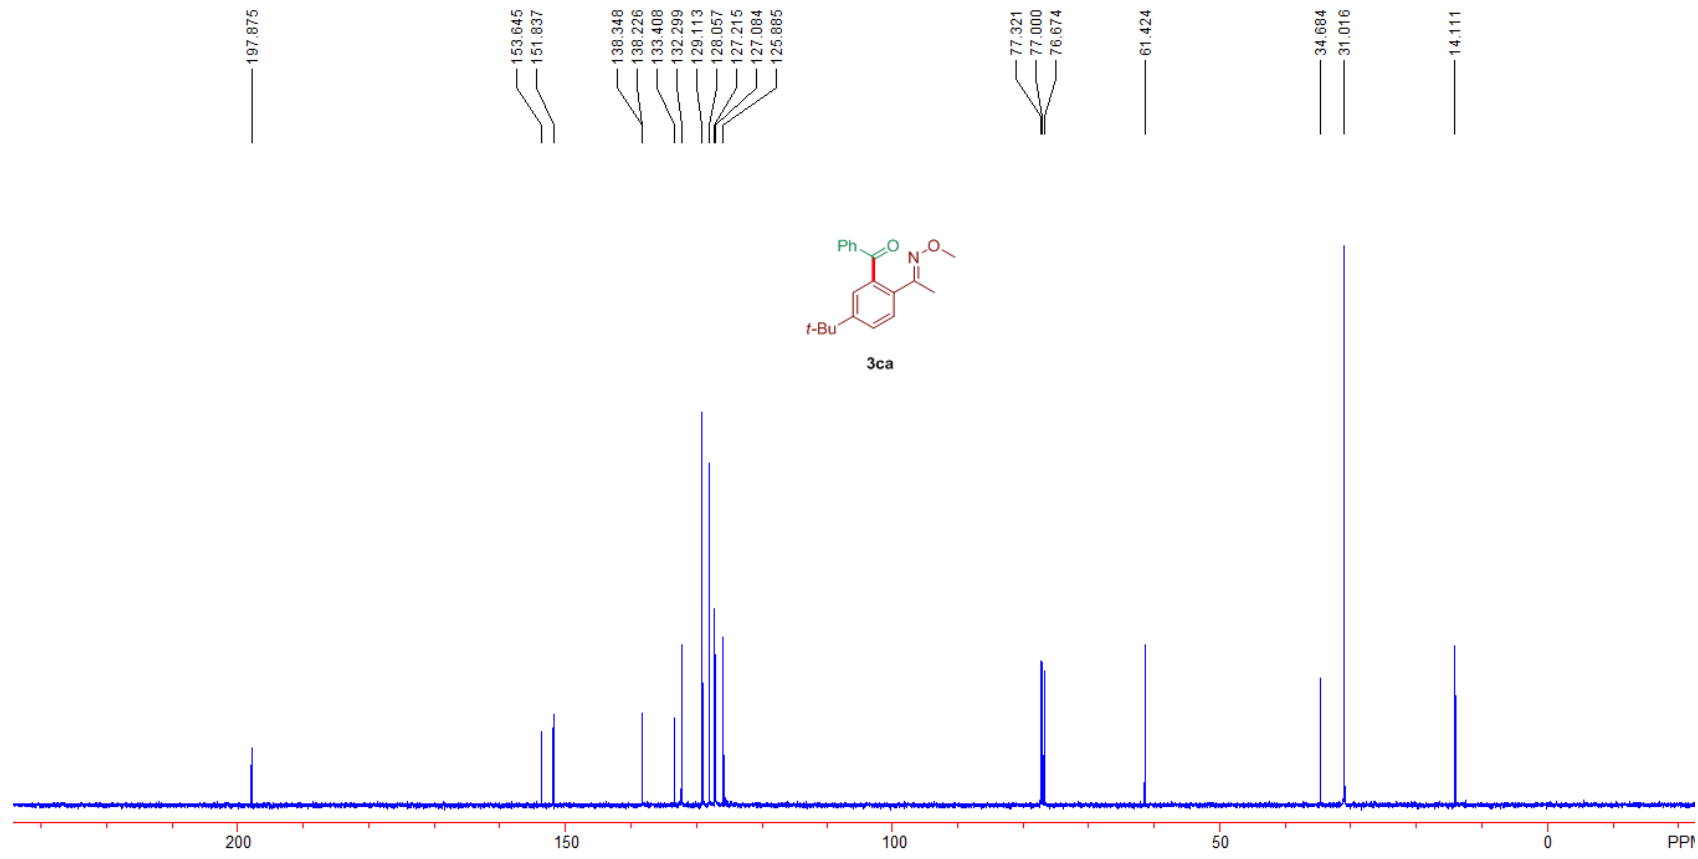

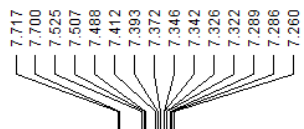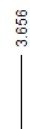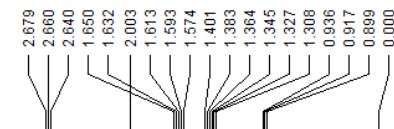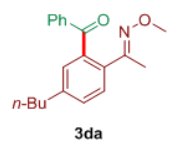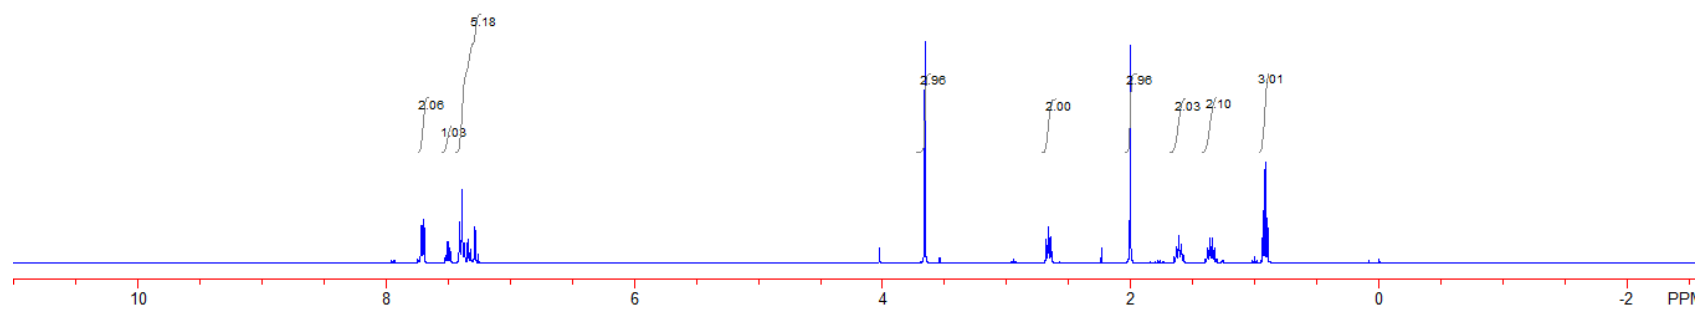

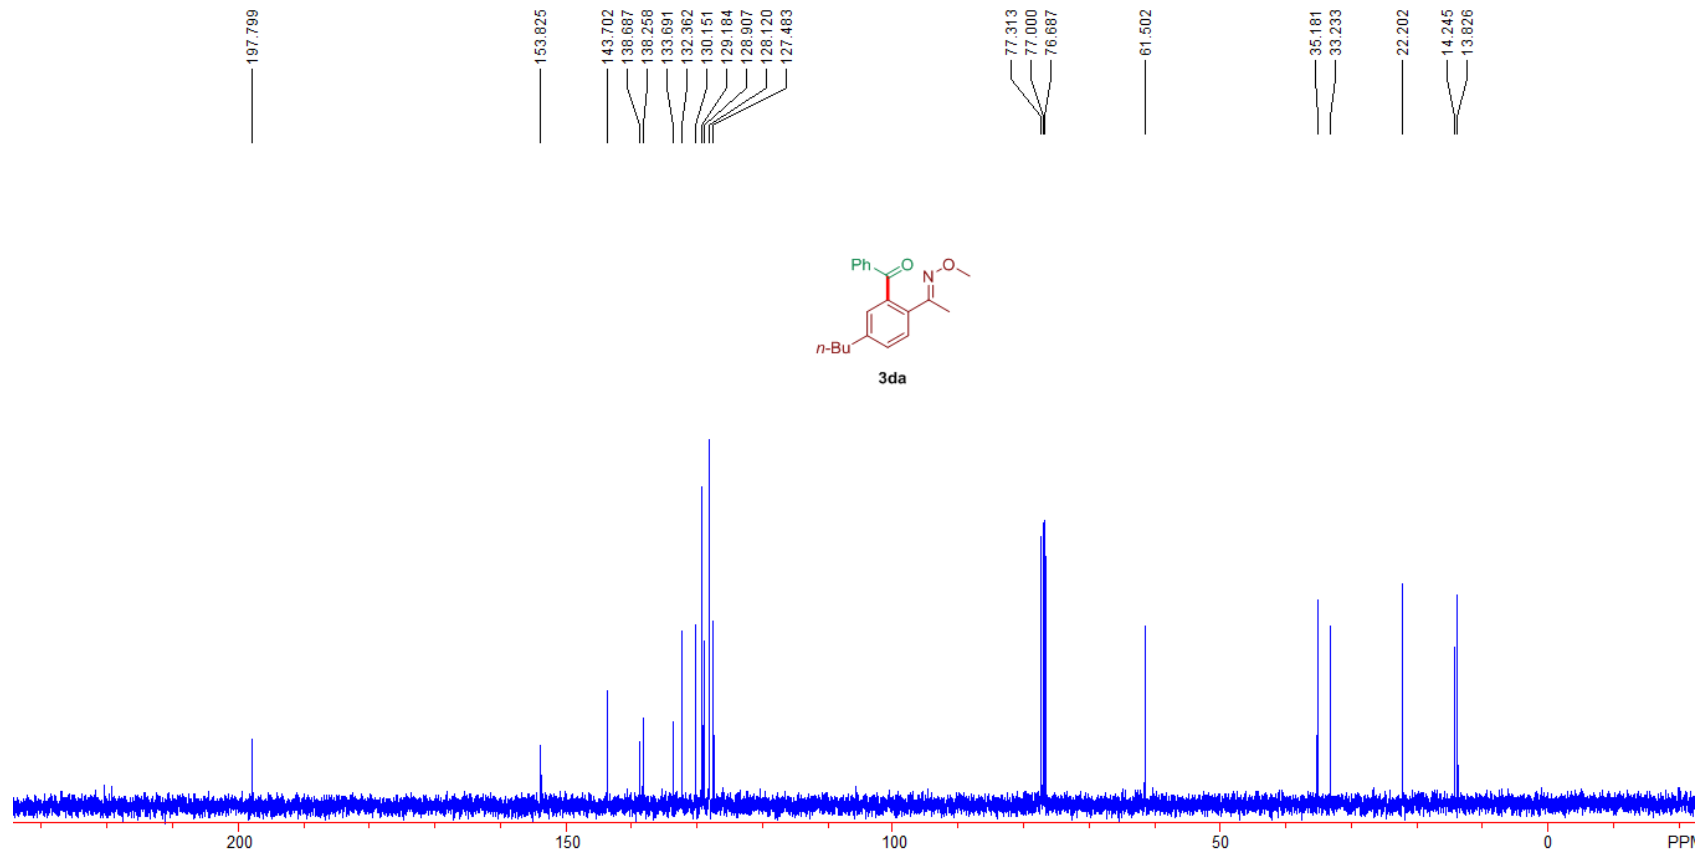

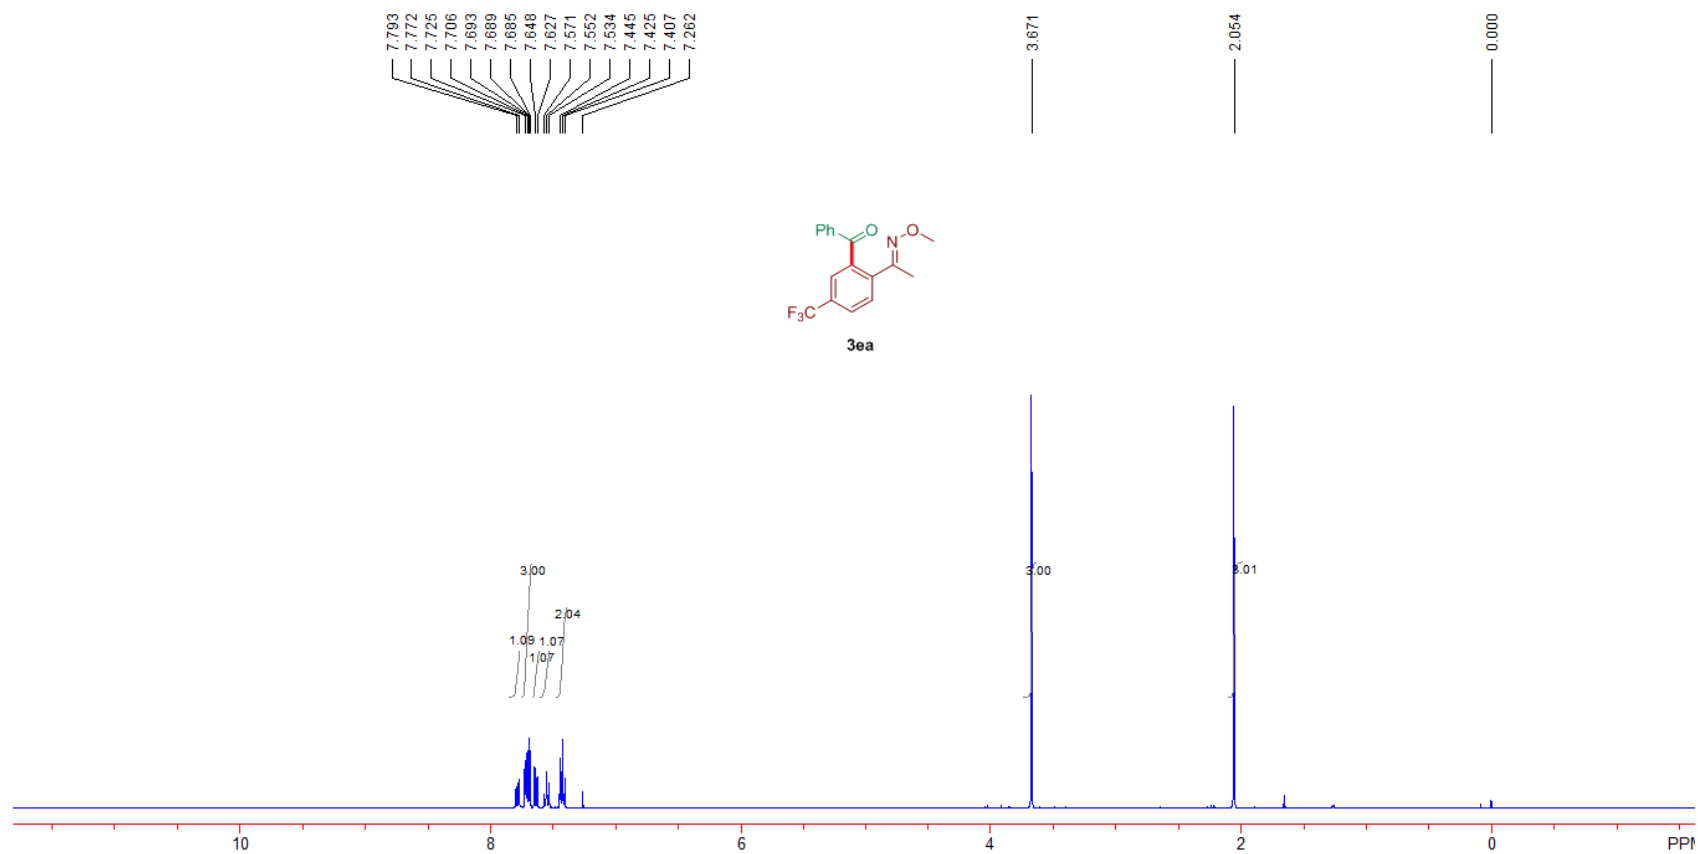

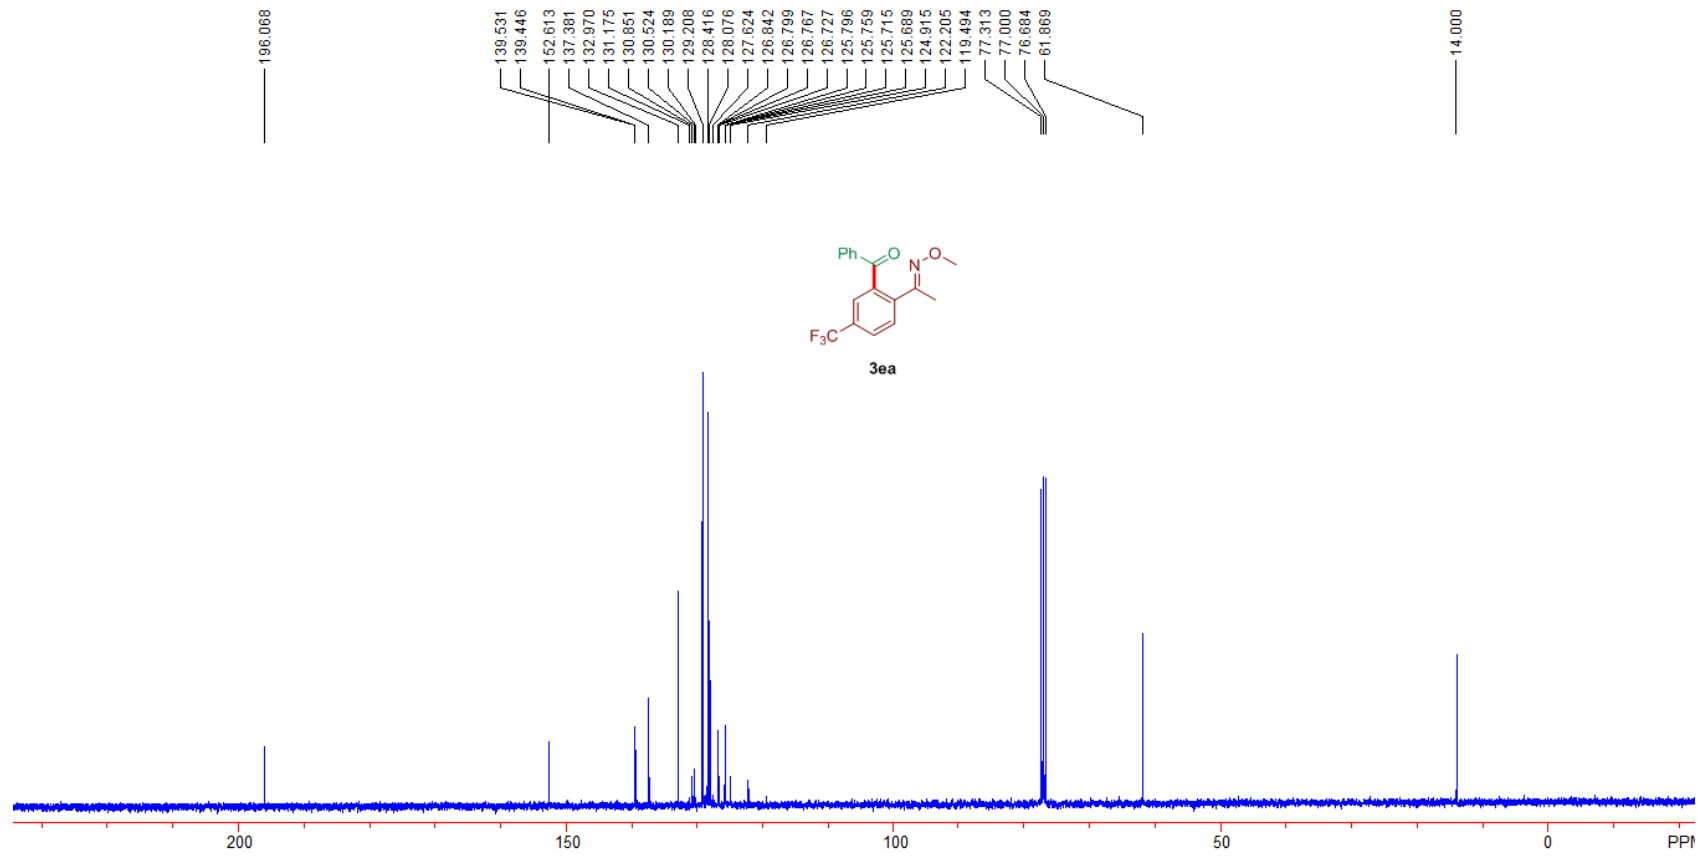

8.386  
8.380  
8.365  
8.359  
8.299  
8.293  
7.716  
7.710  
7.698  
7.689  
7.597  
7.579  
7.560  
7.464  
7.445  
7.426  
7.263

3.677

2.088

-0.000

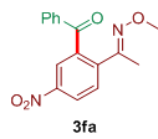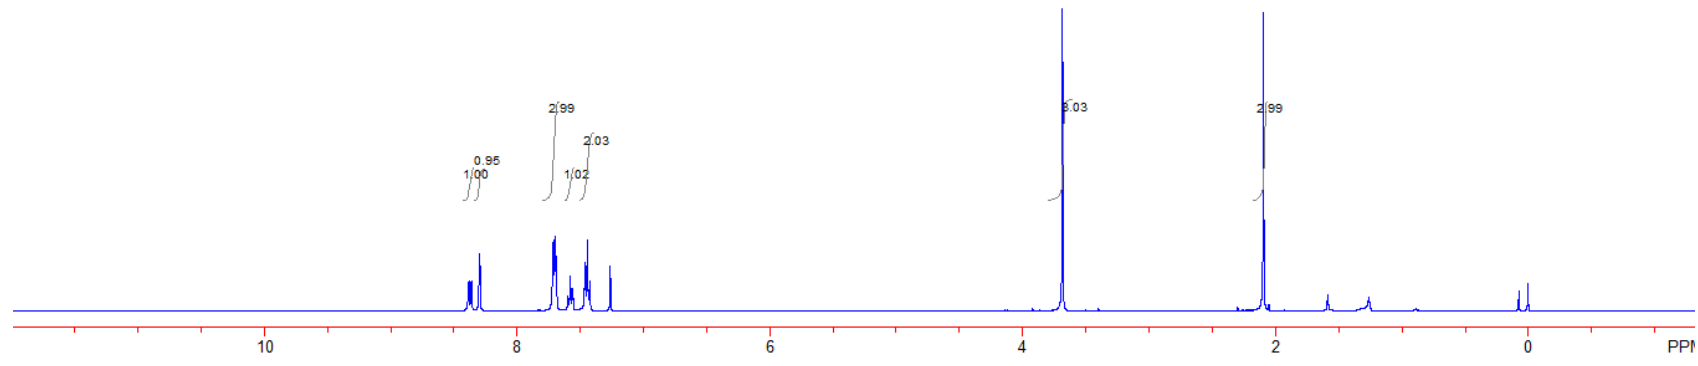

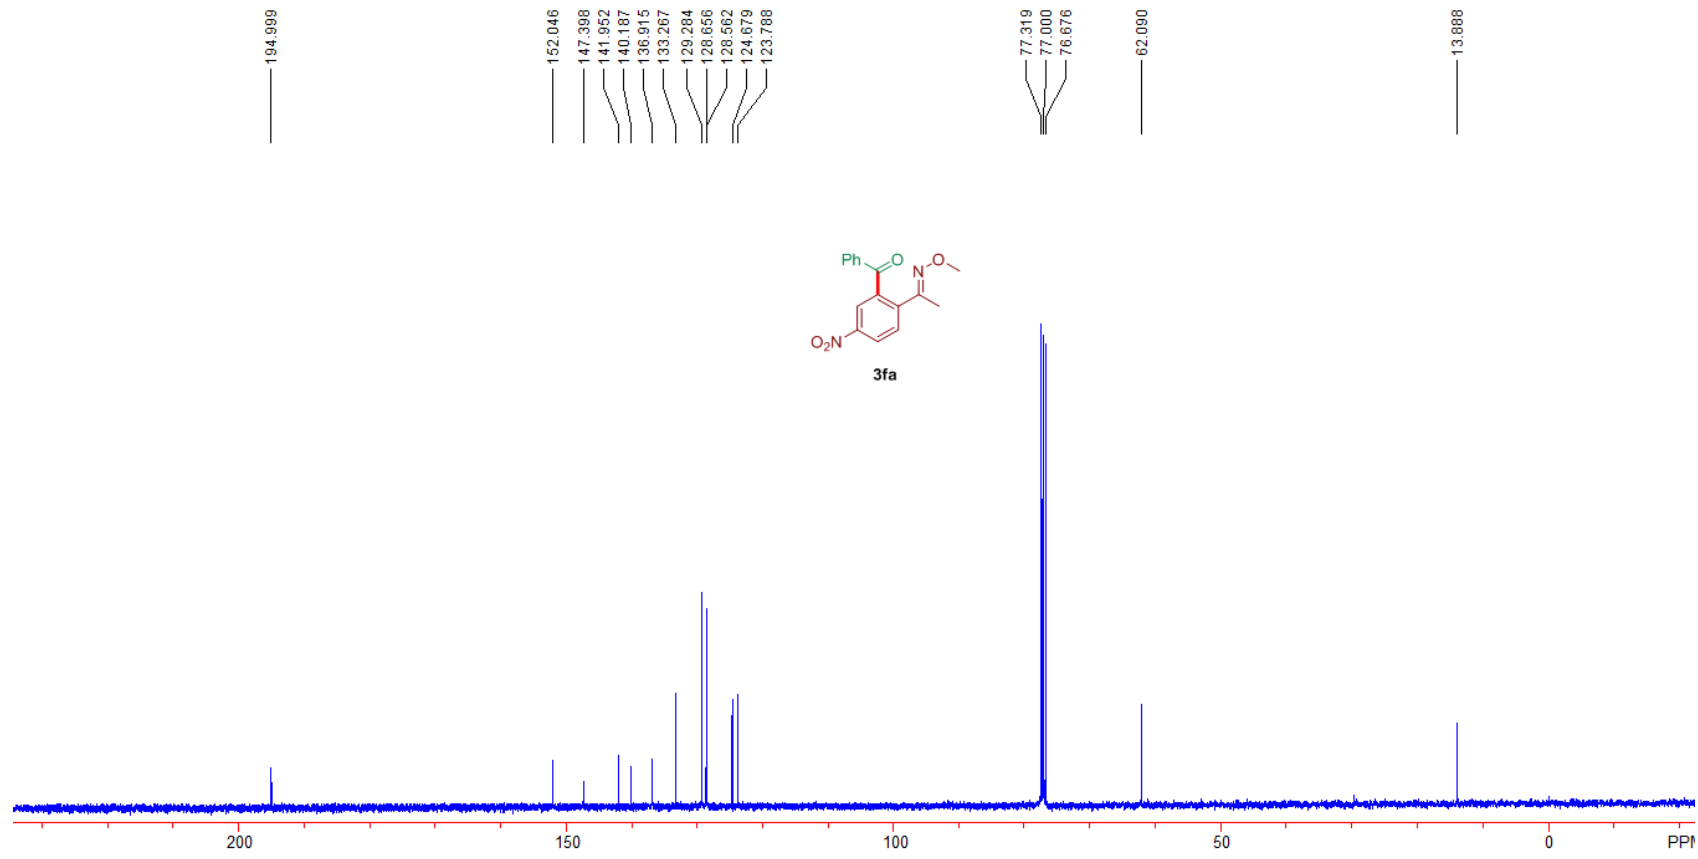

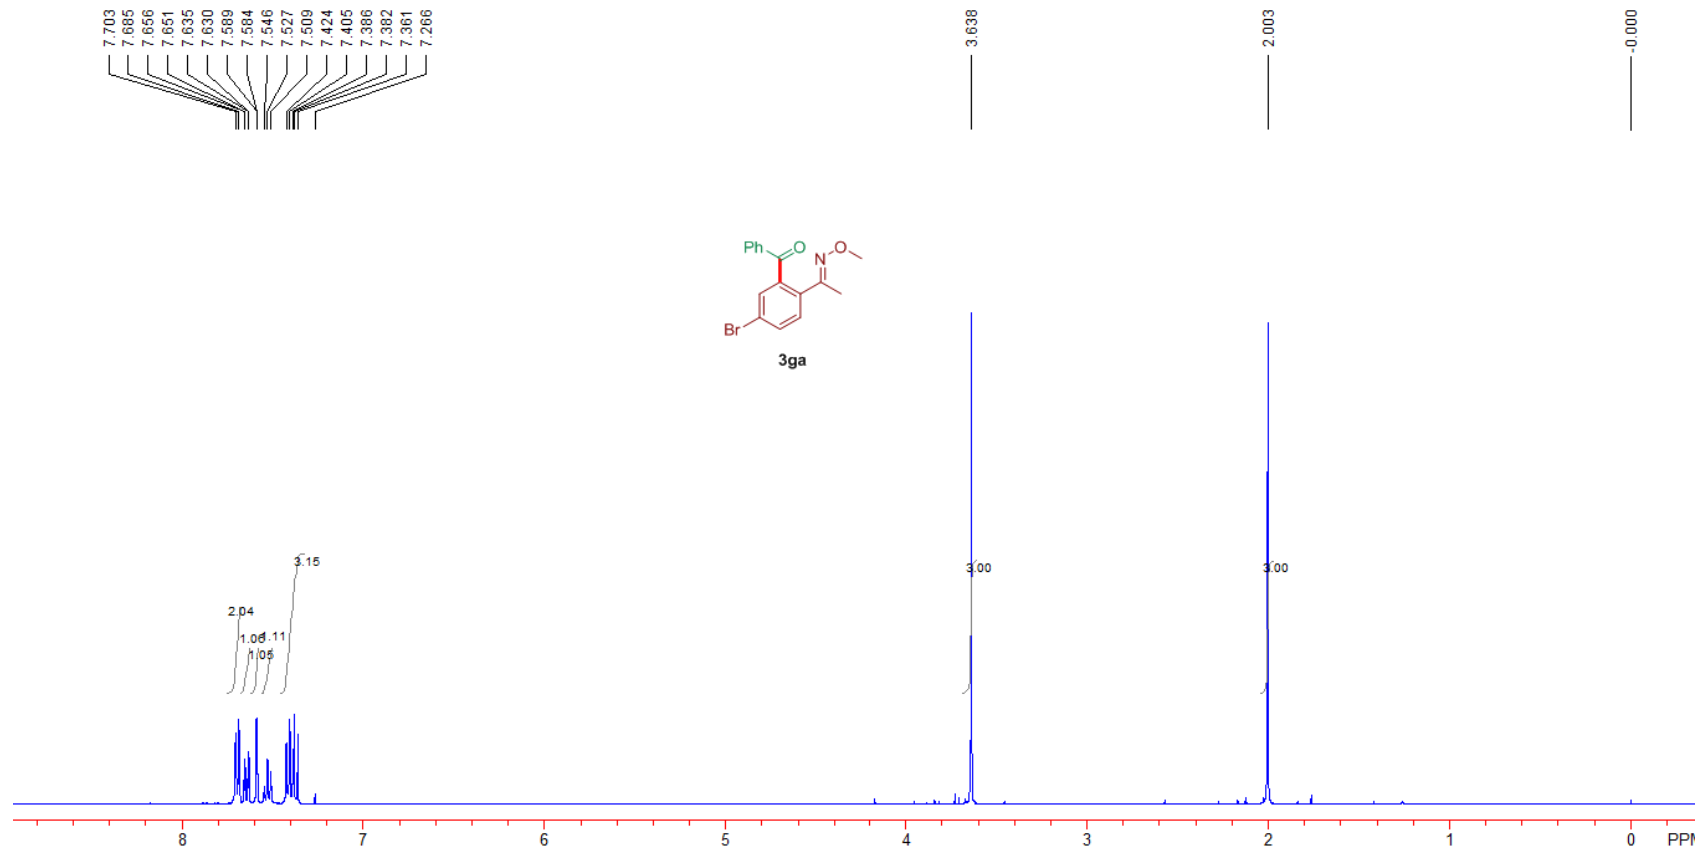



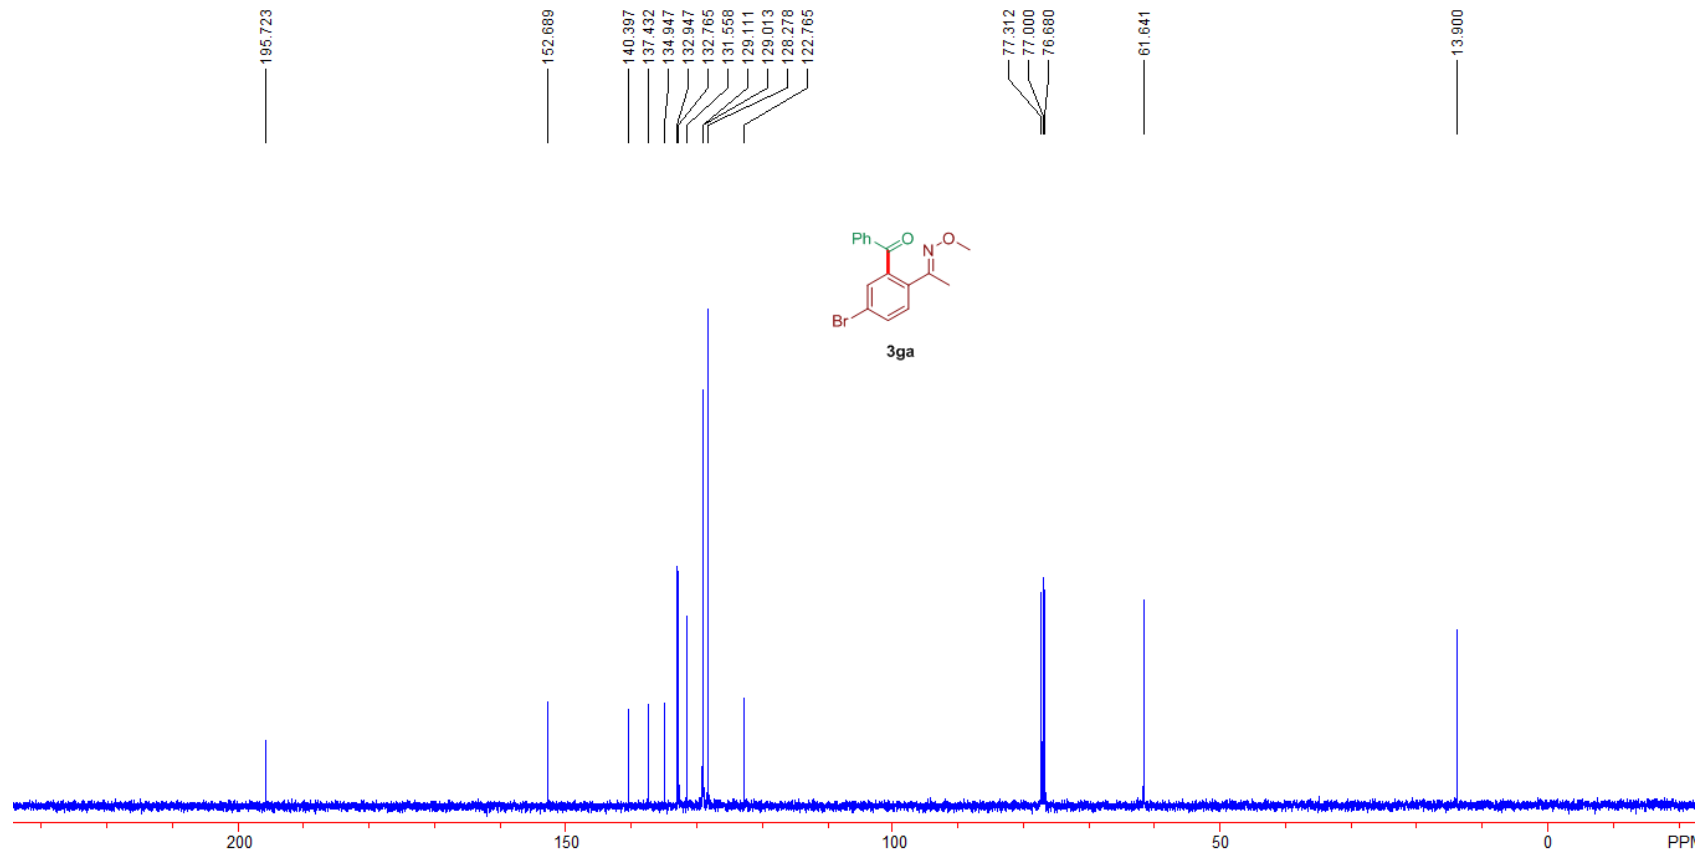

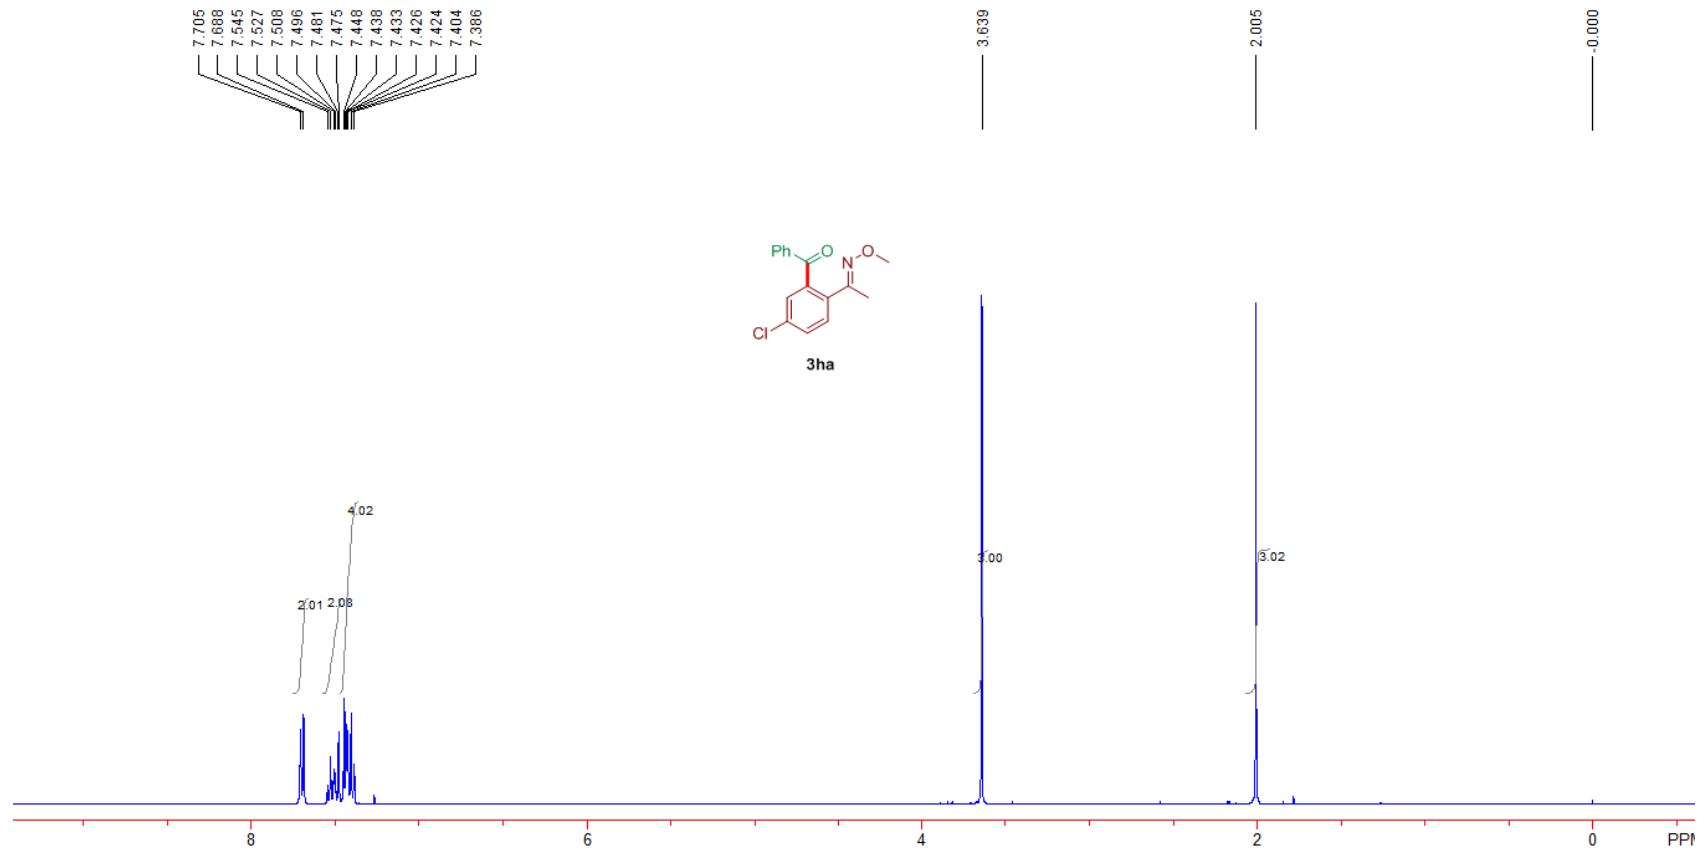

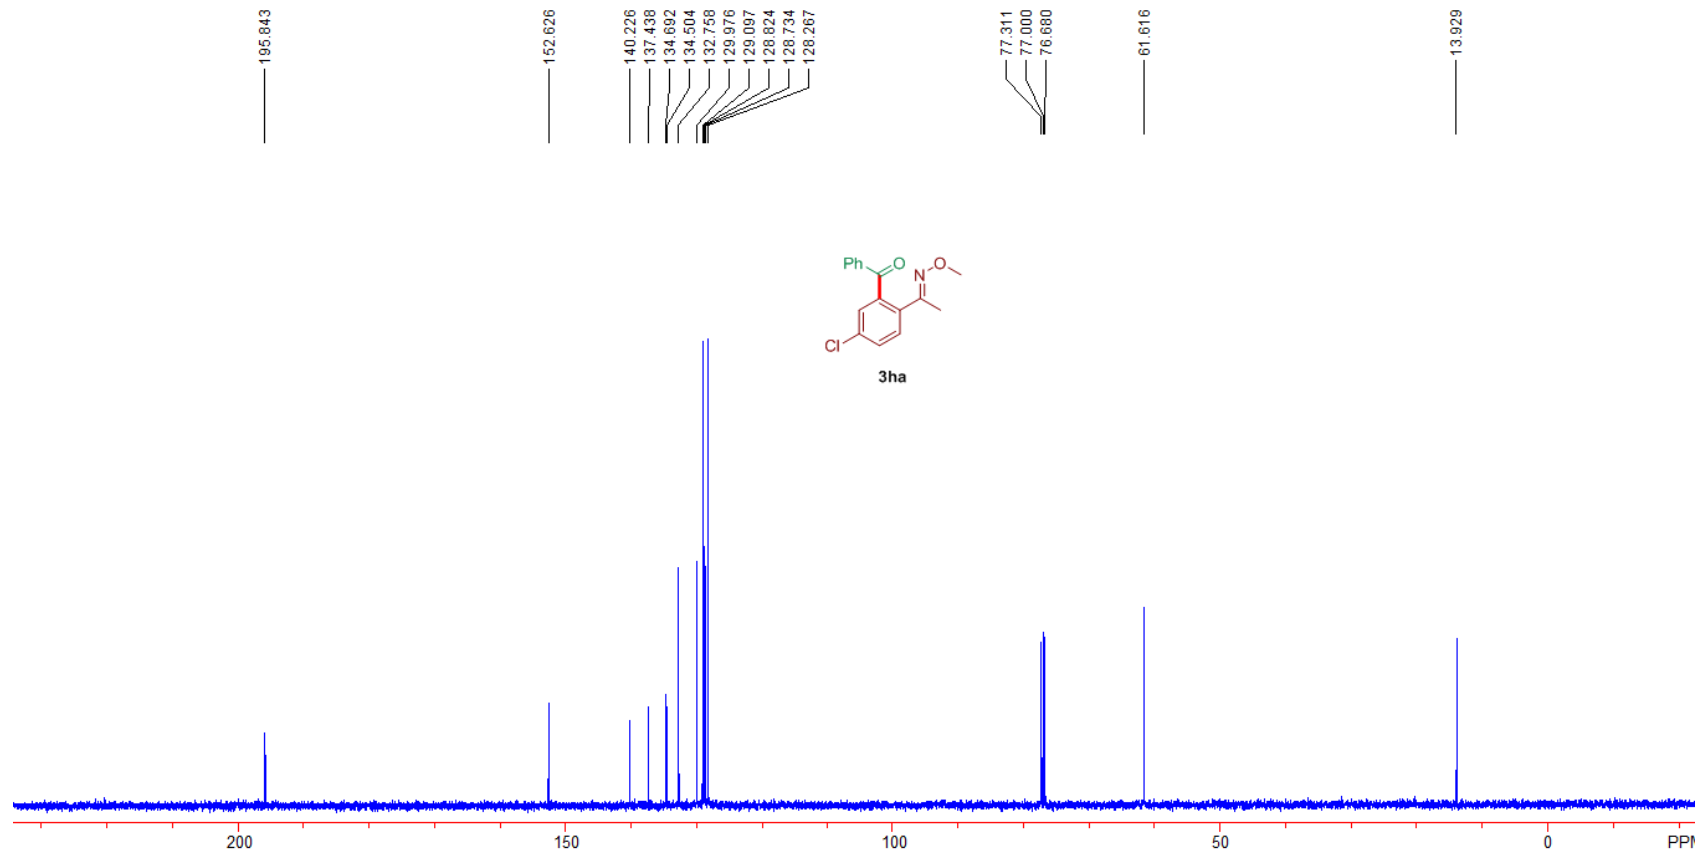

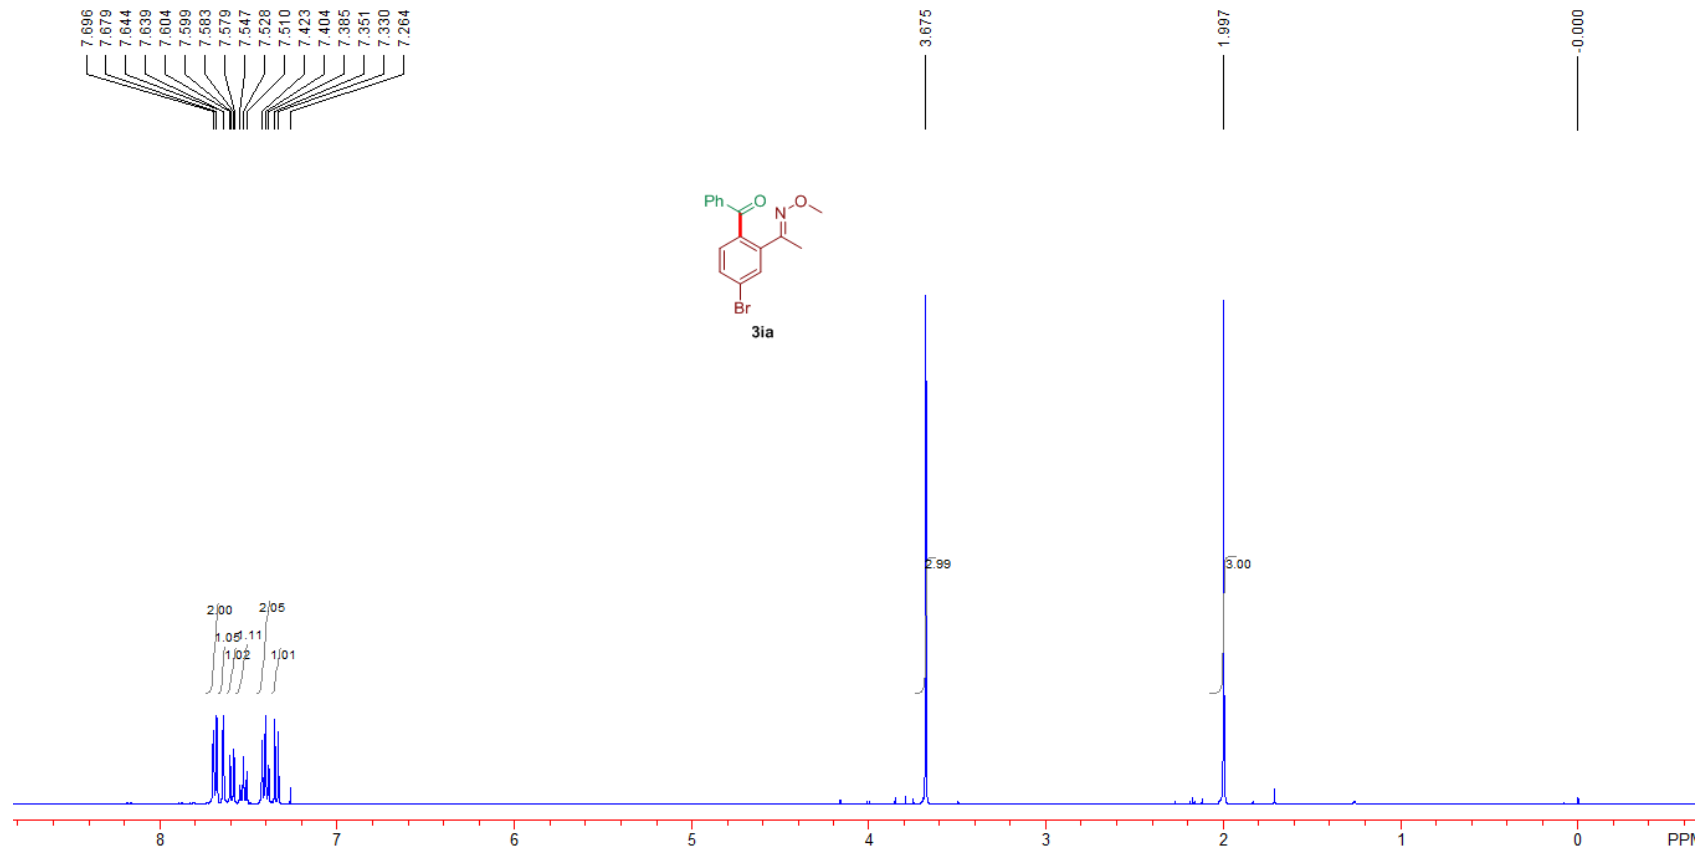

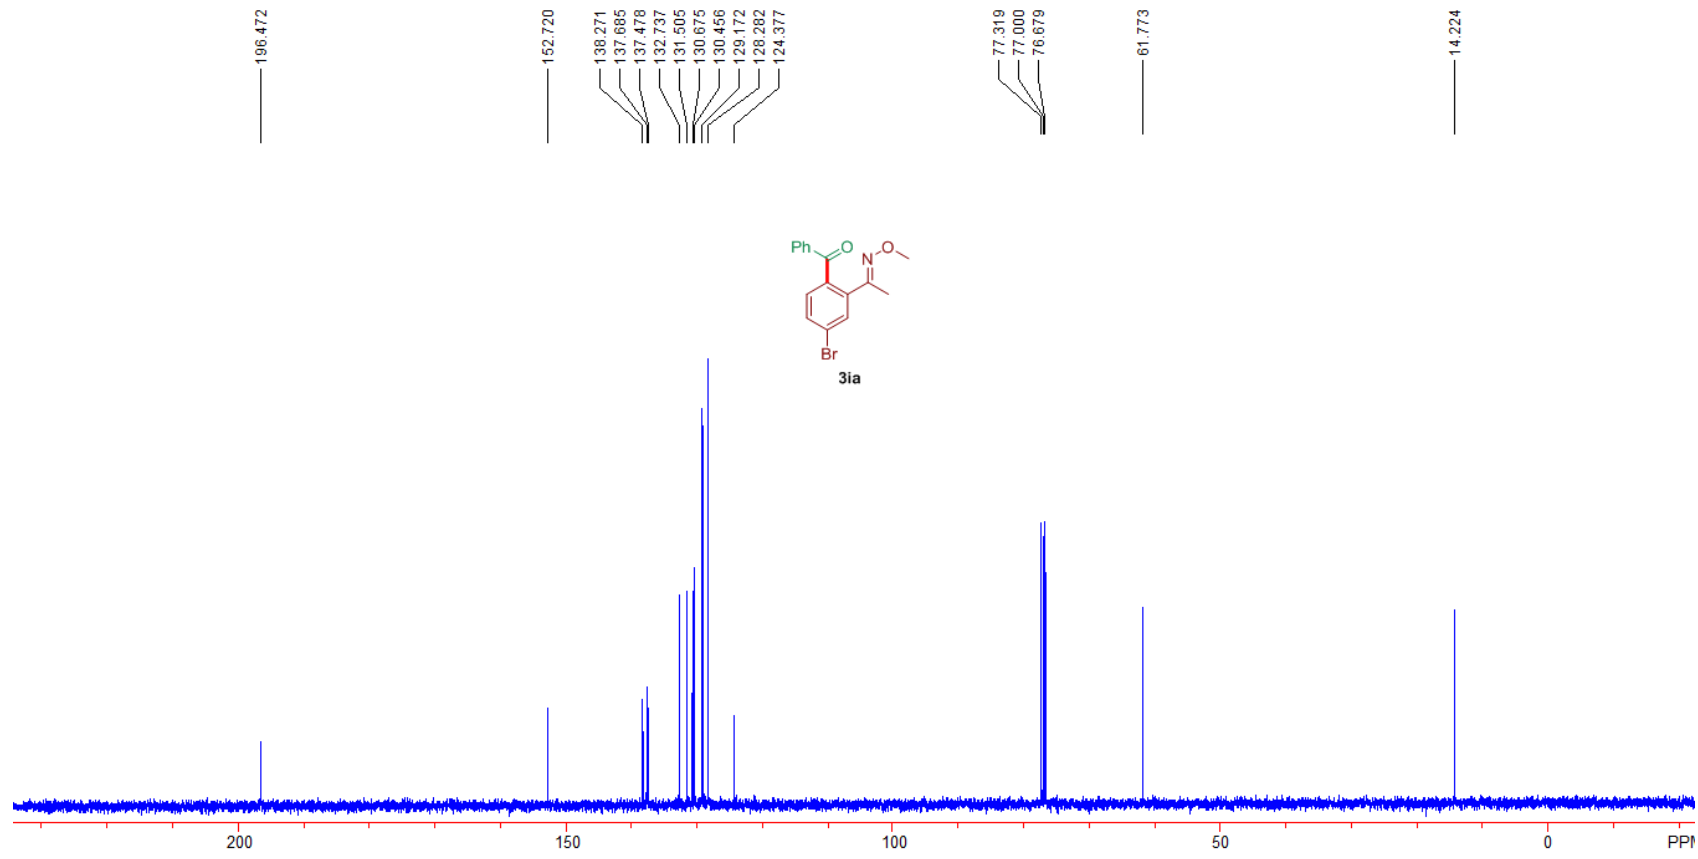

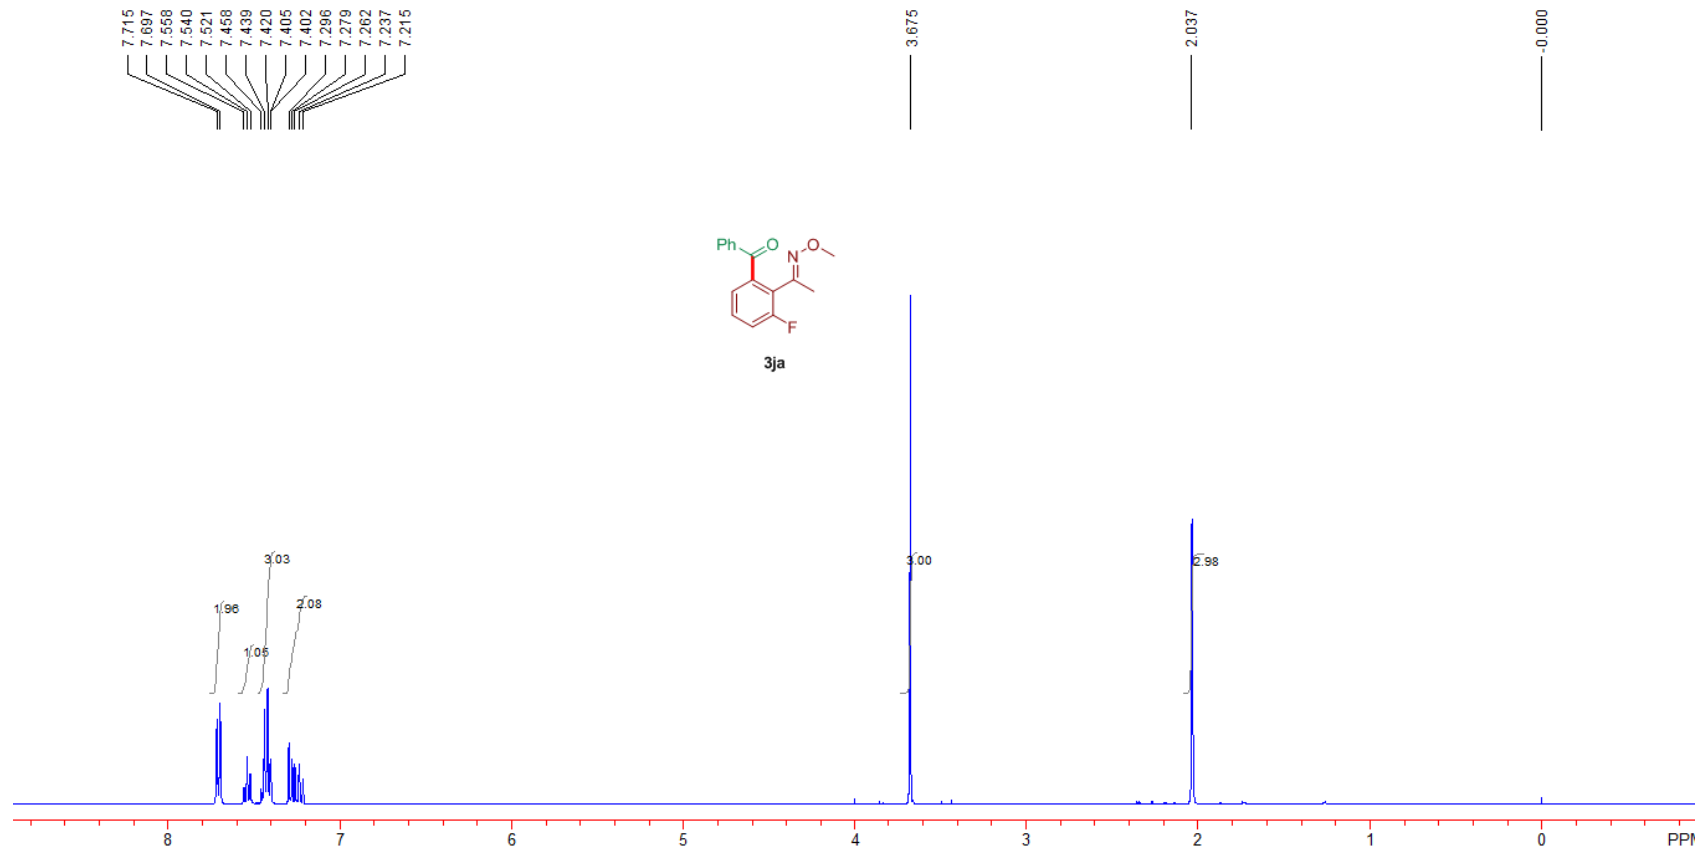

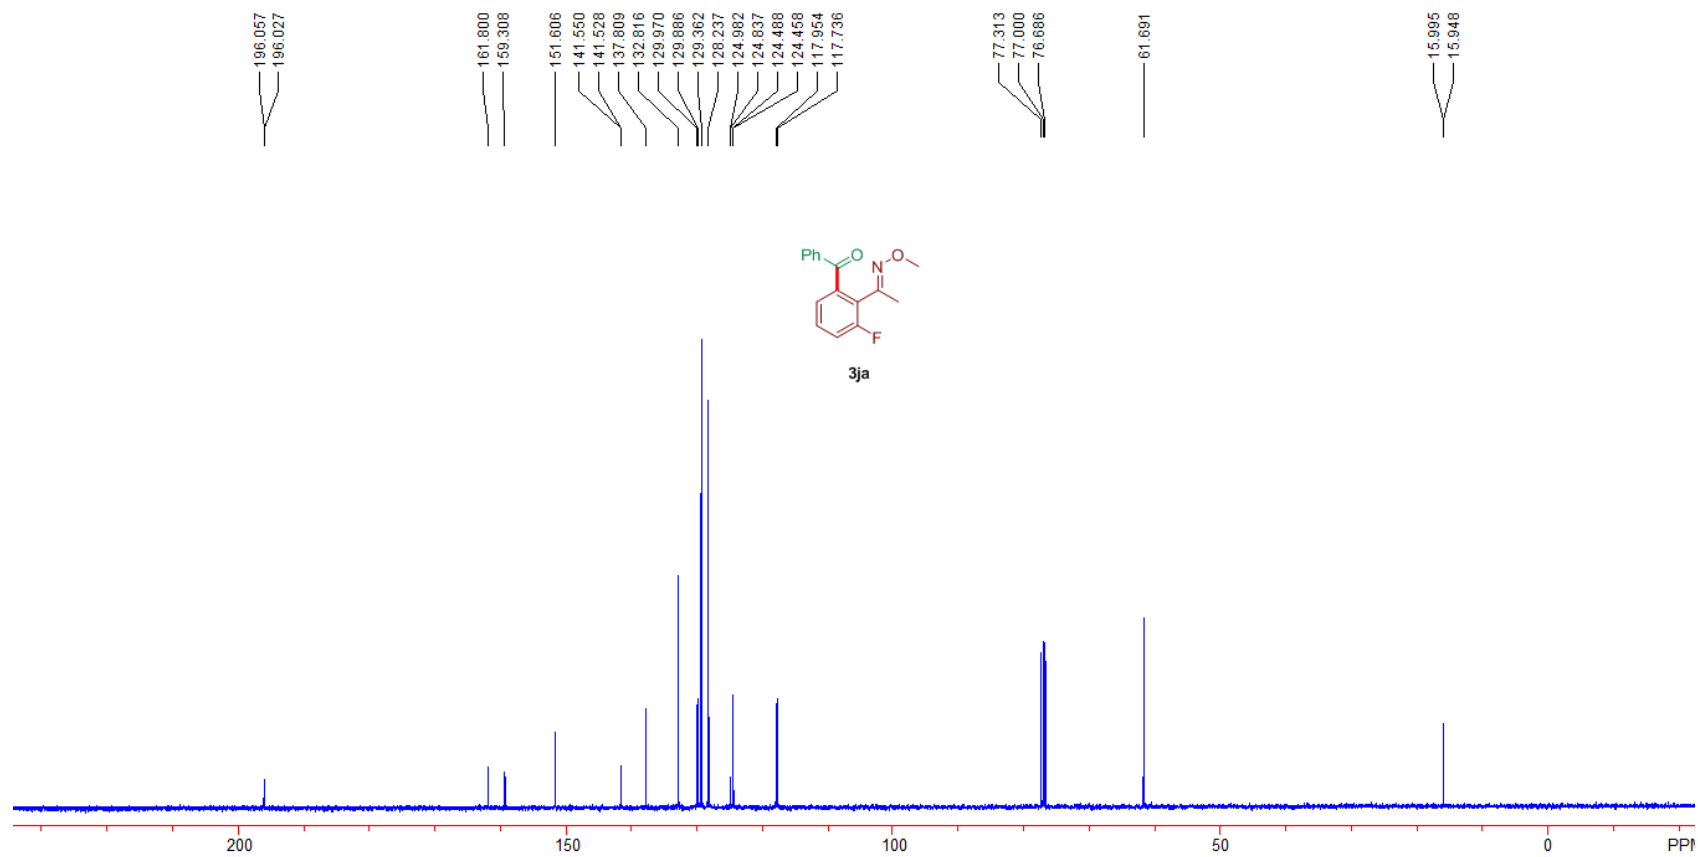

7.739  
7.721  
7.490  
7.476  
7.472  
7.463  
7.460  
7.451  
7.432  
7.426  
7.416  
7.384  
7.365  
7.346  
7.294  
7.288  
7.265

3.687

-0.000

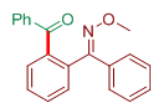

3ka

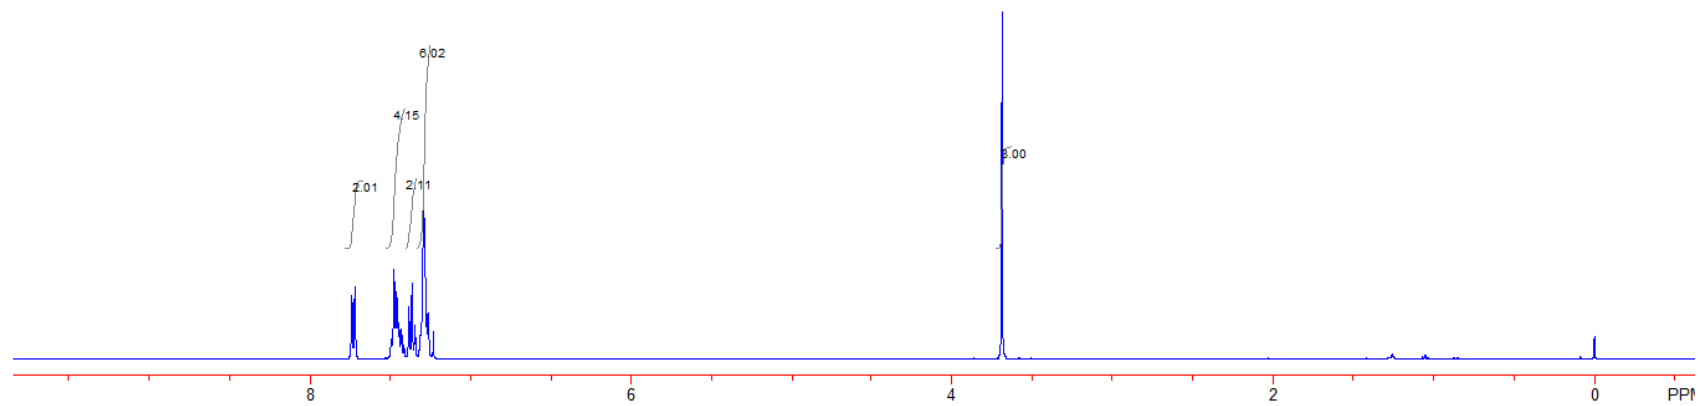



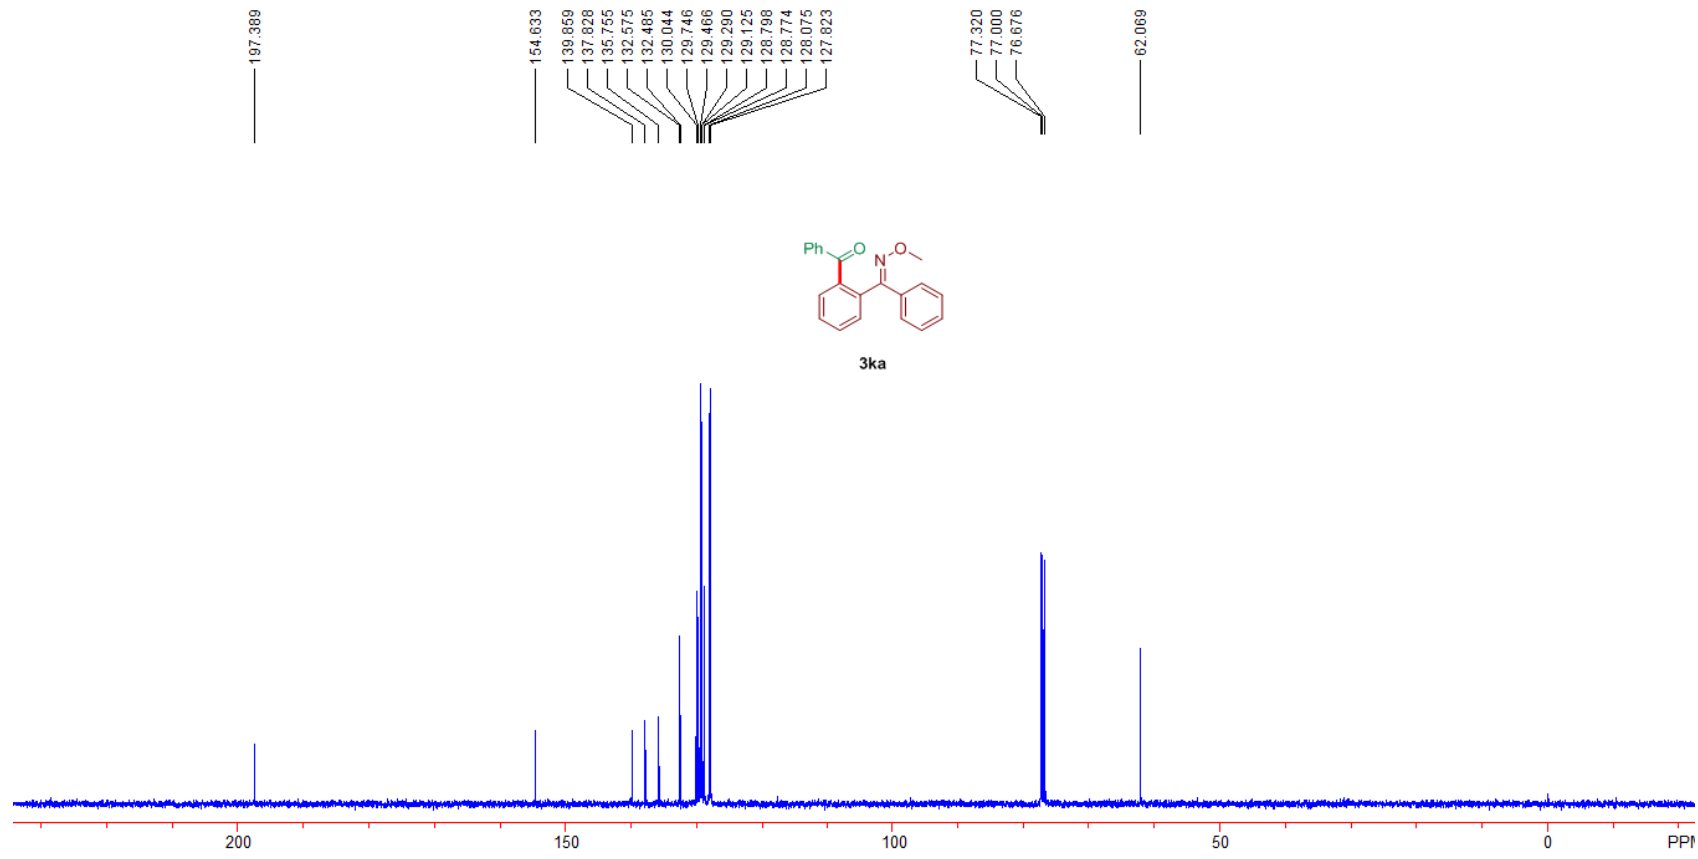

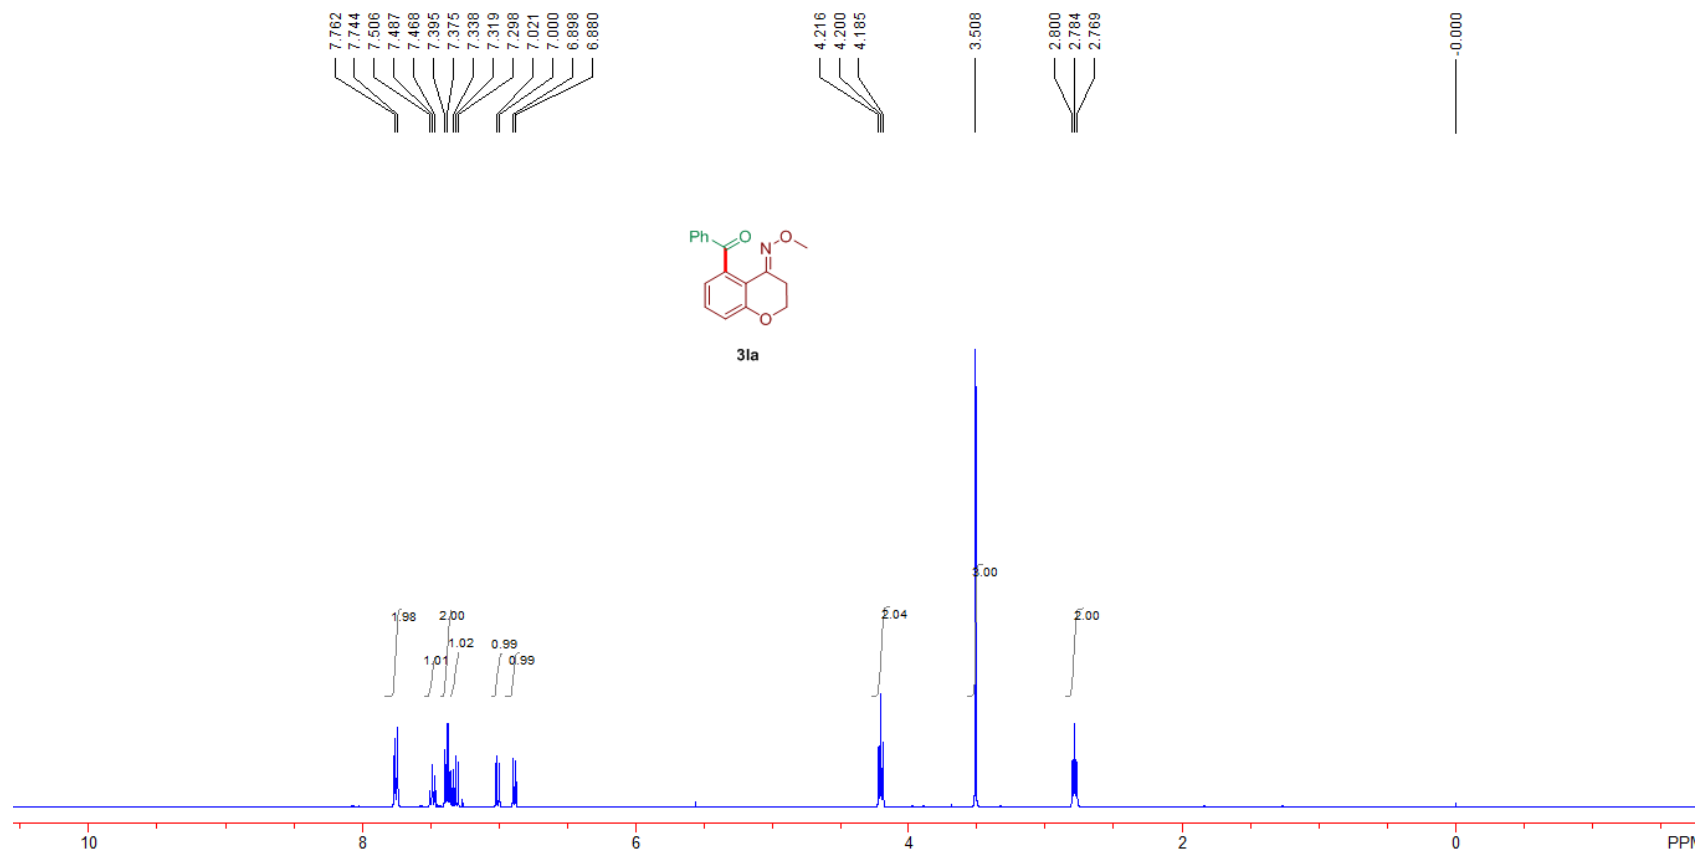

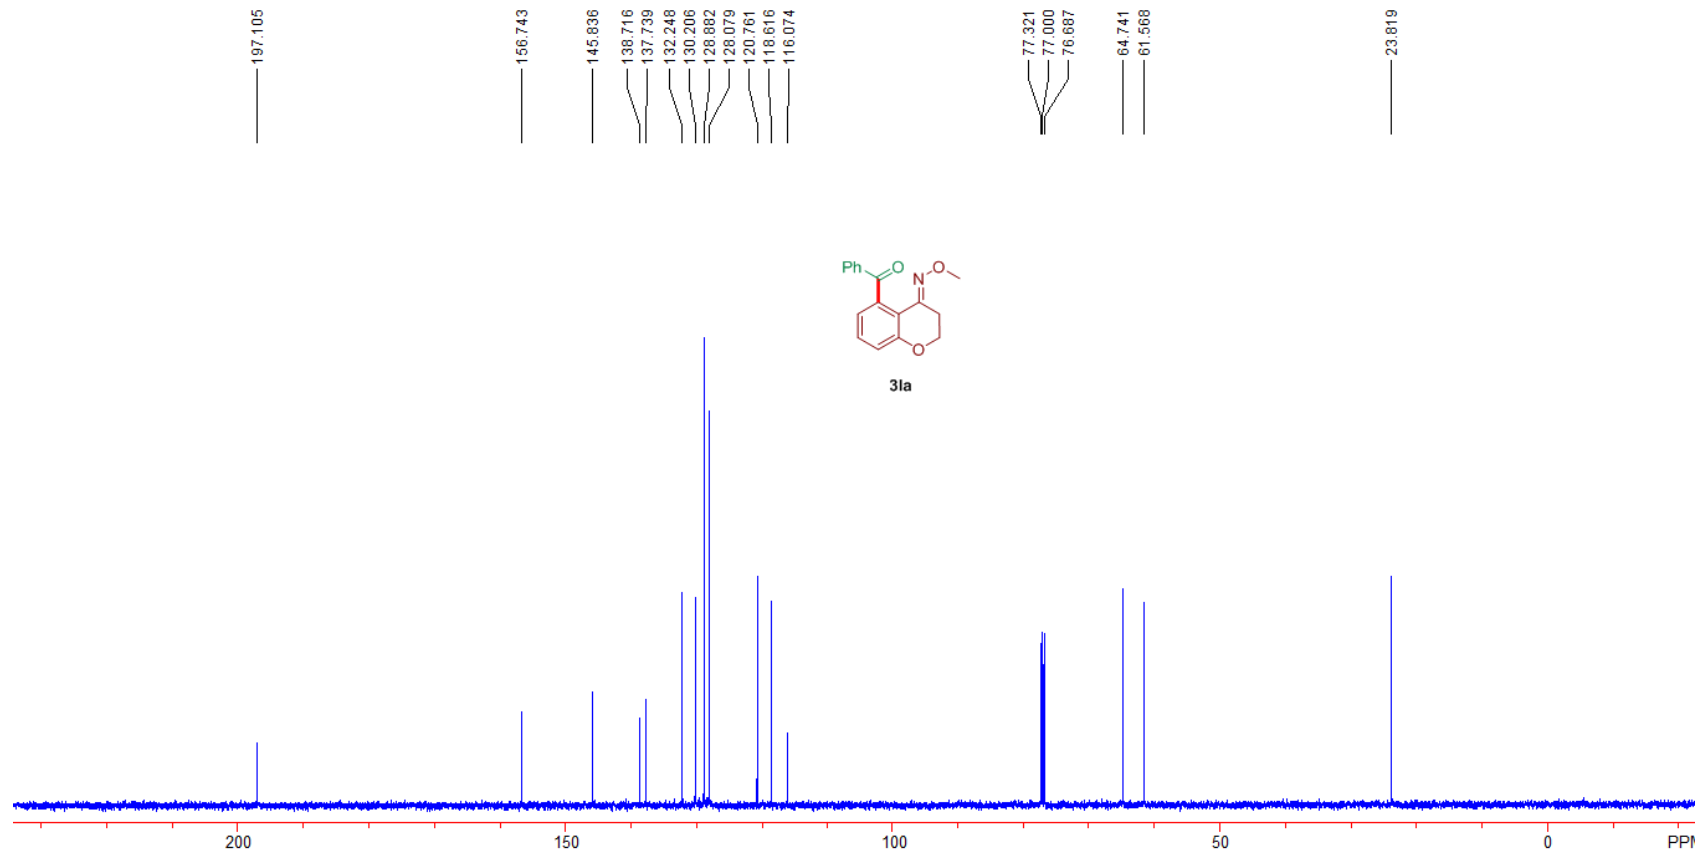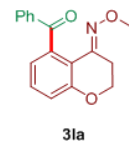

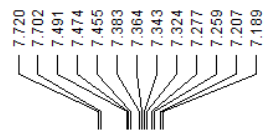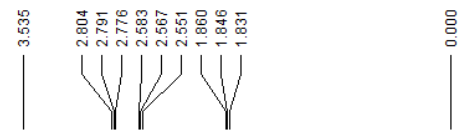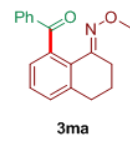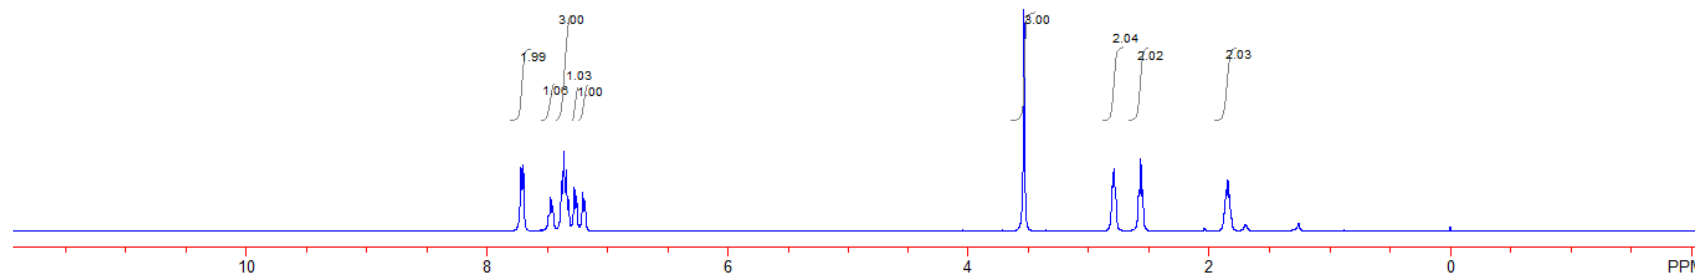

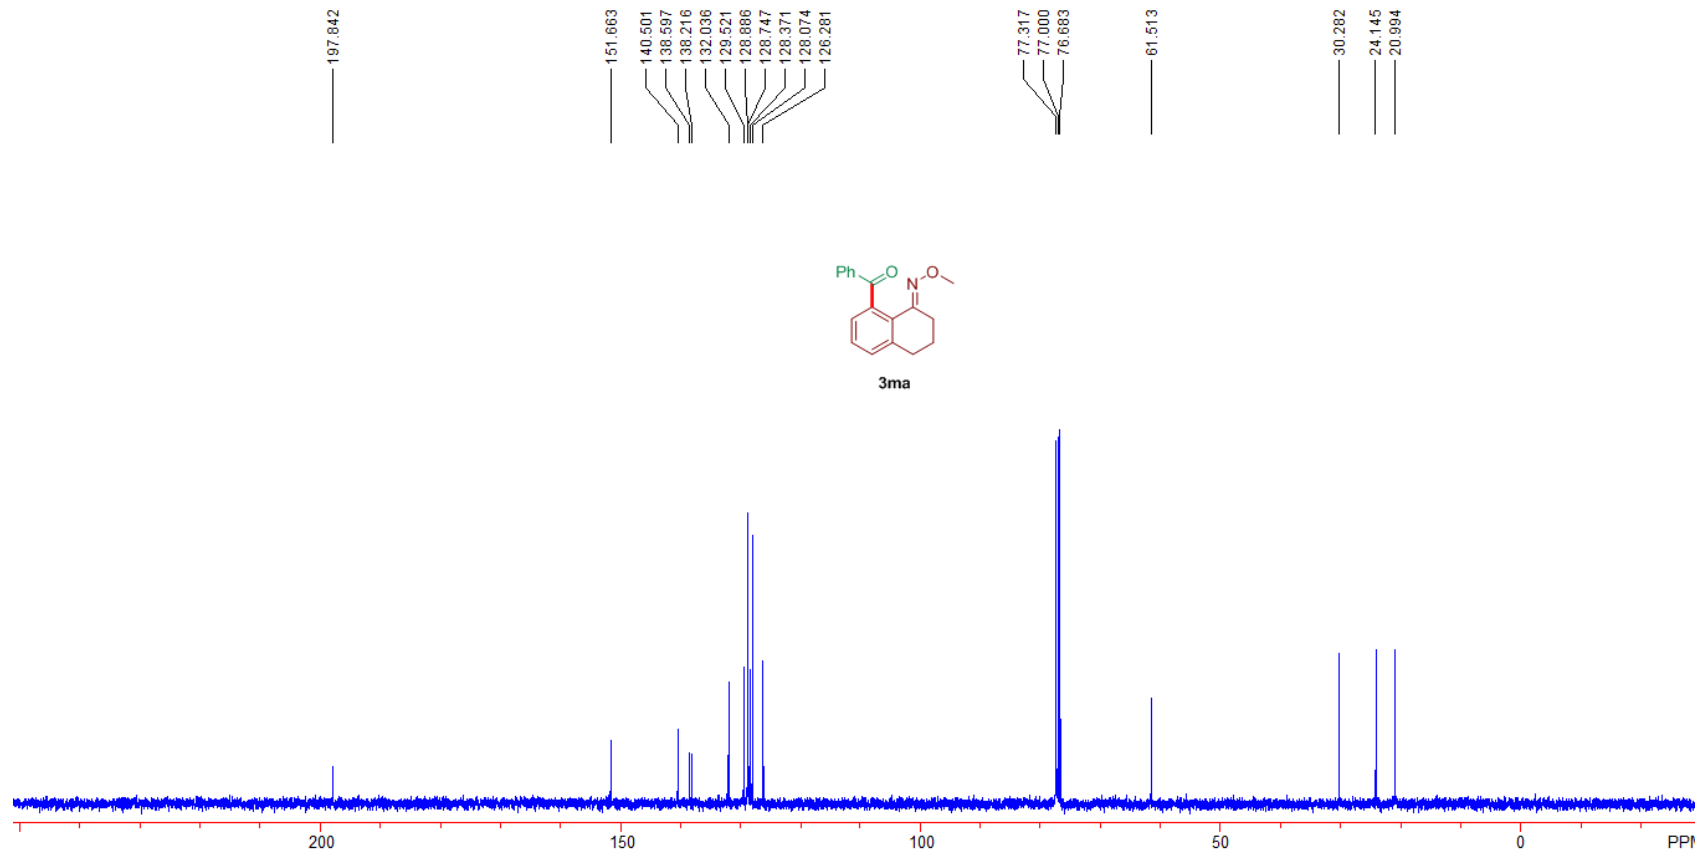

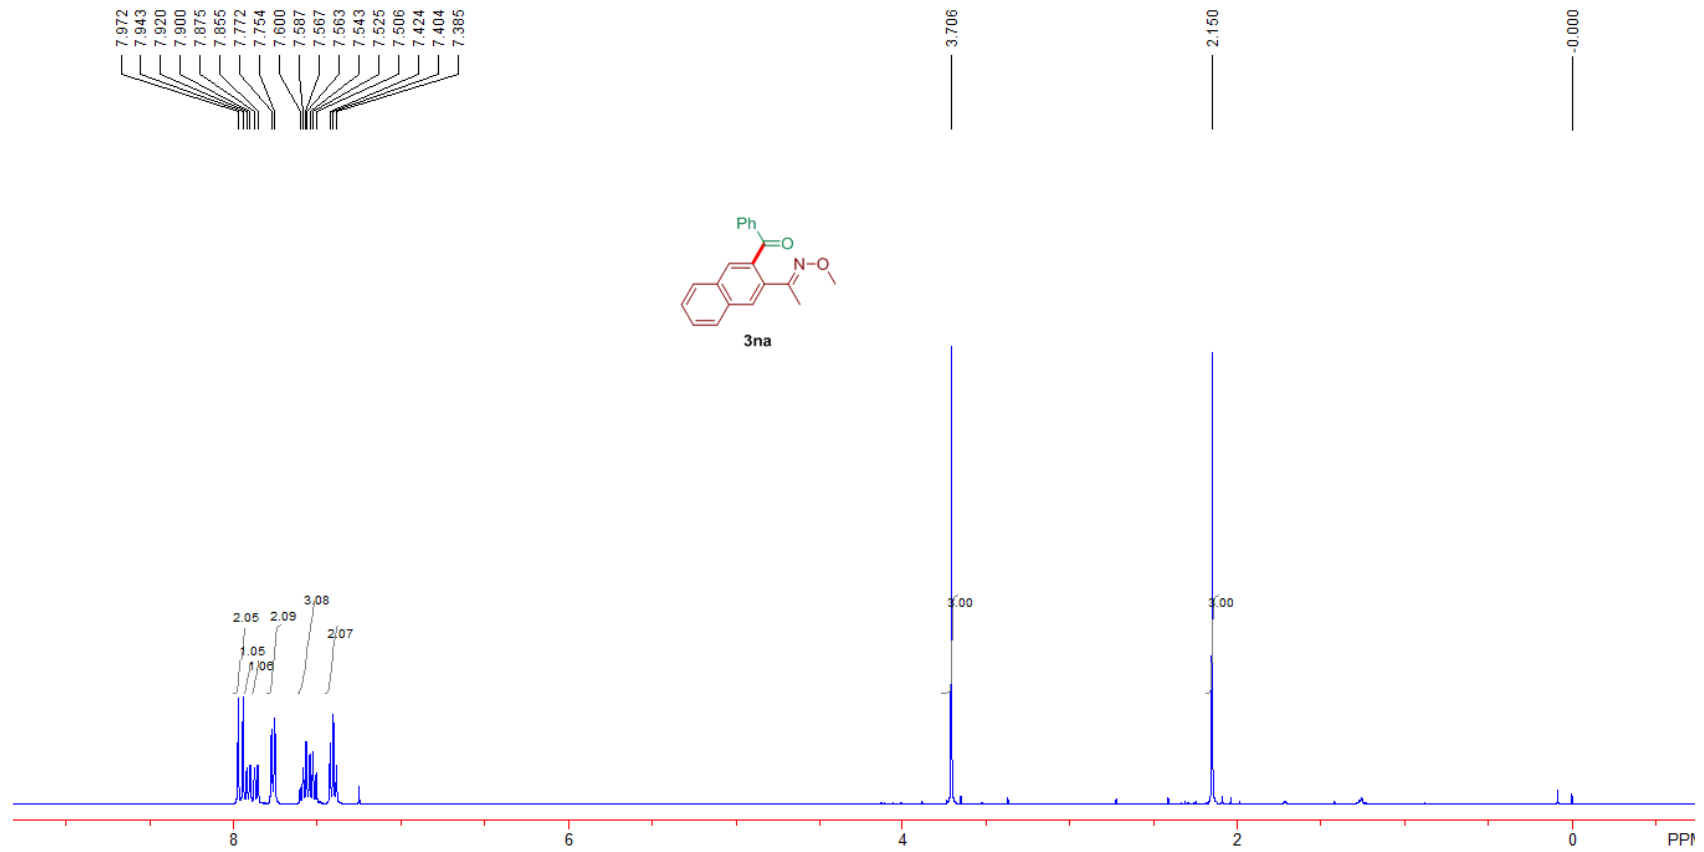

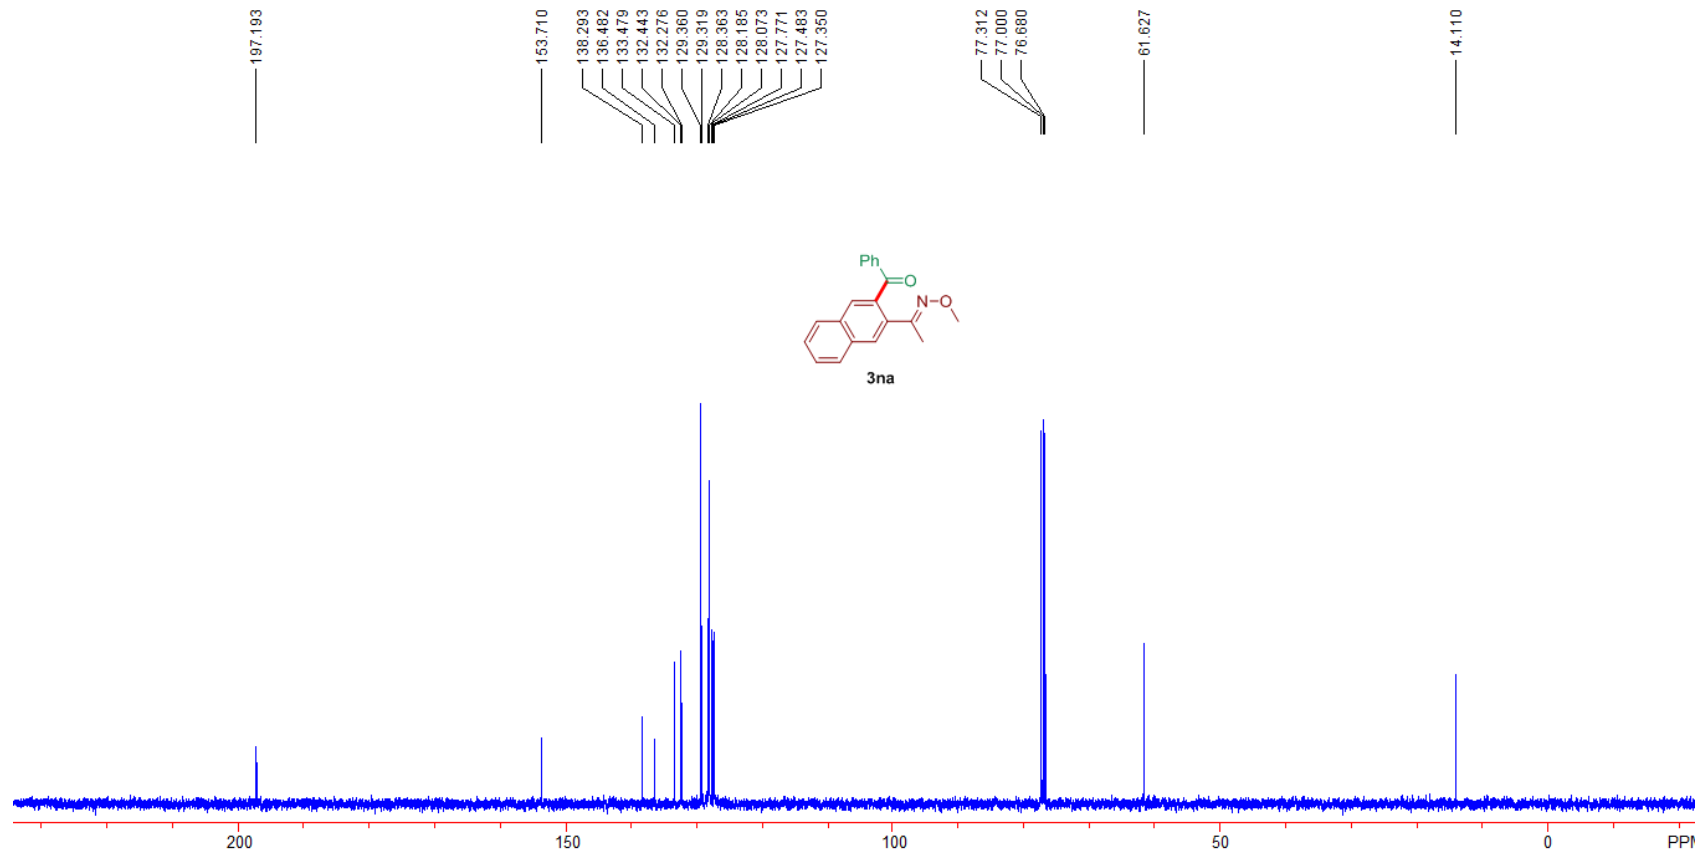

7.724  
7.706  
7.526  
7.515  
7.507  
7.489  
7.481  
7.457  
7.452  
7.405  
7.386  
7.367

3.653

2.594  
2.575  
2.566  
2.537

1.005  
0.986  
0.967

-0.000

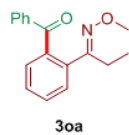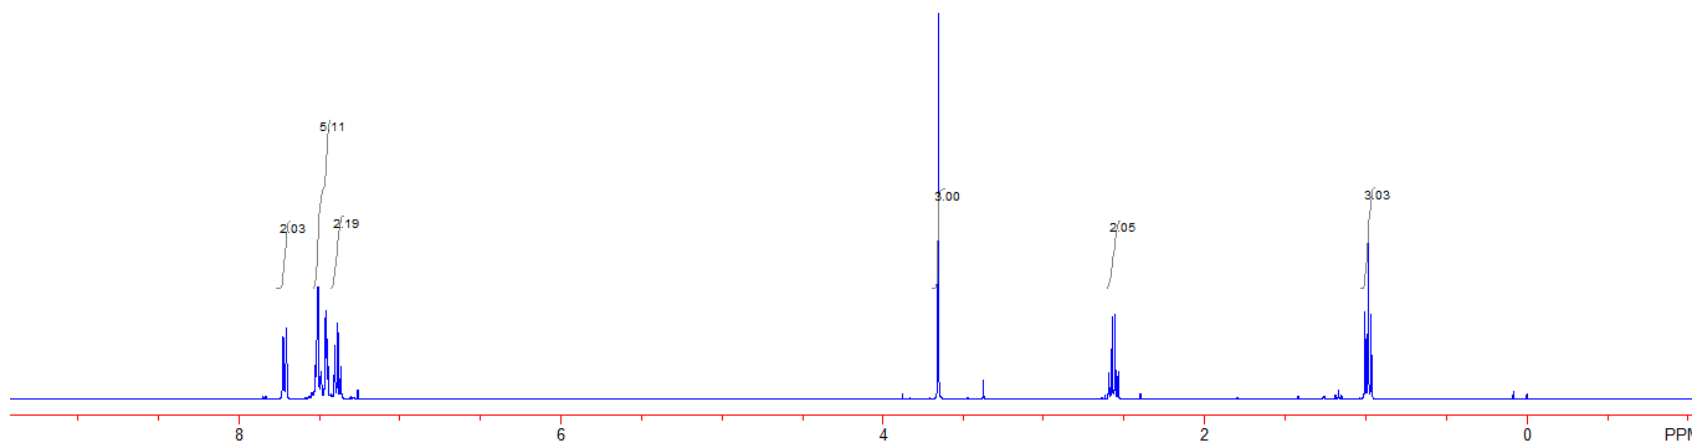



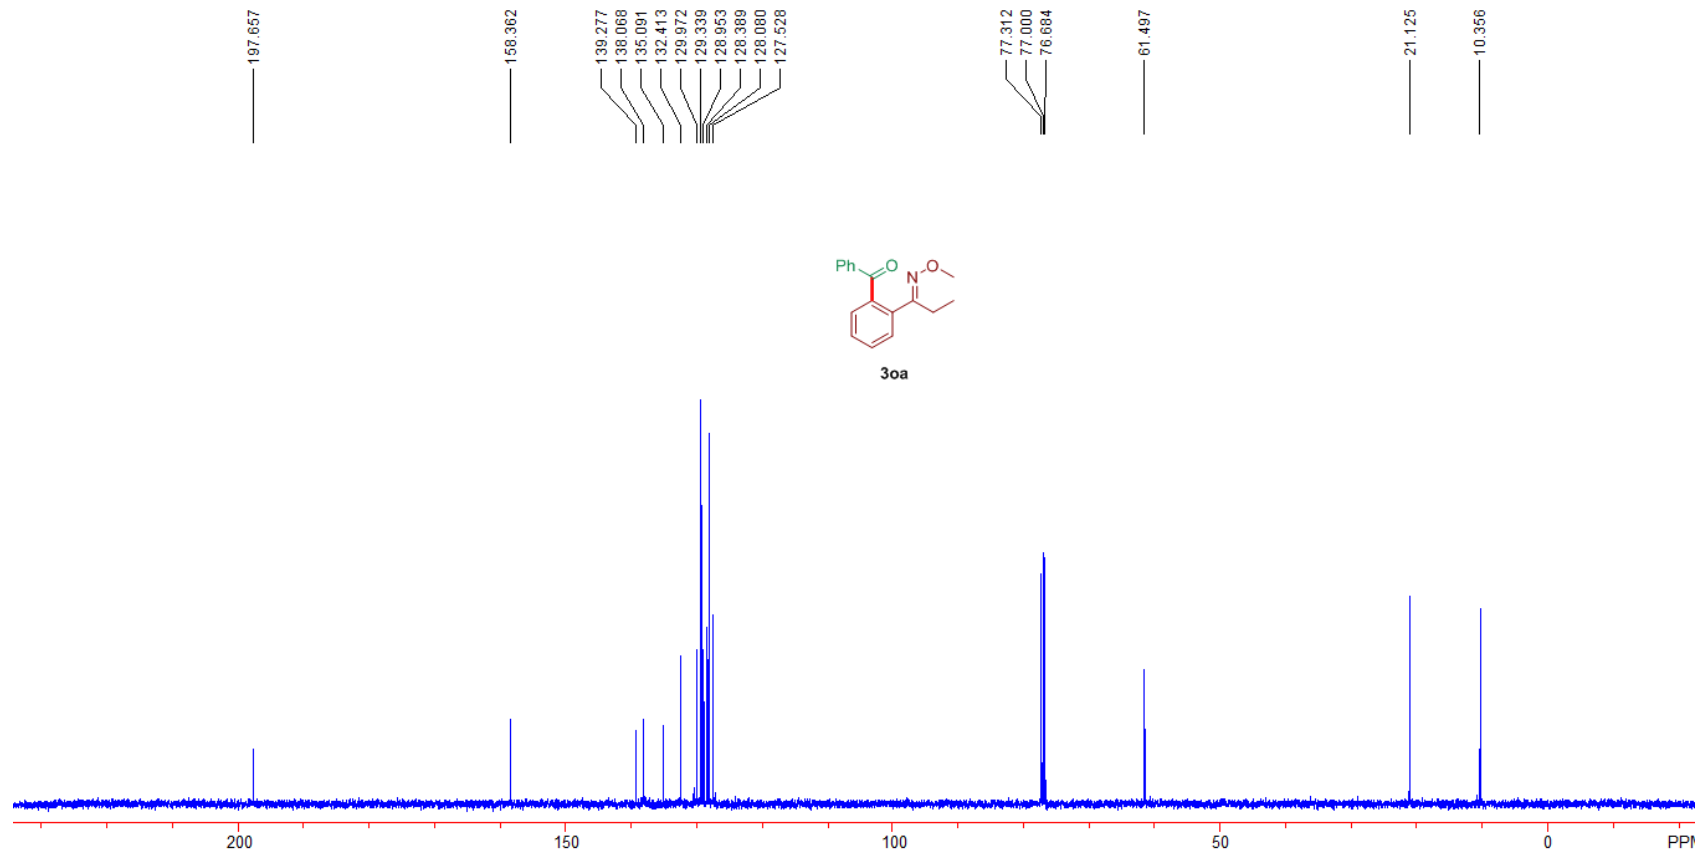

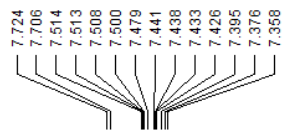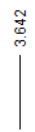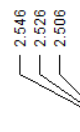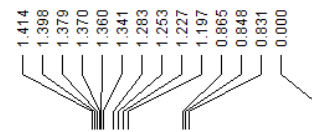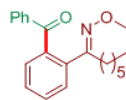

3pa

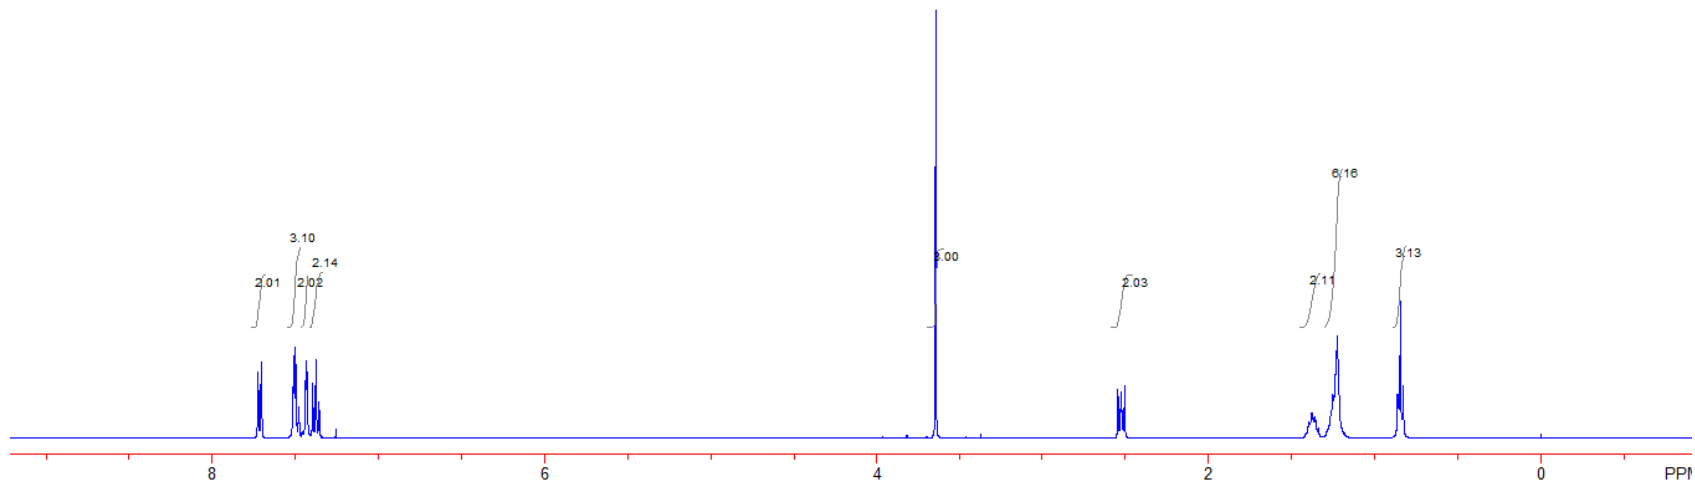

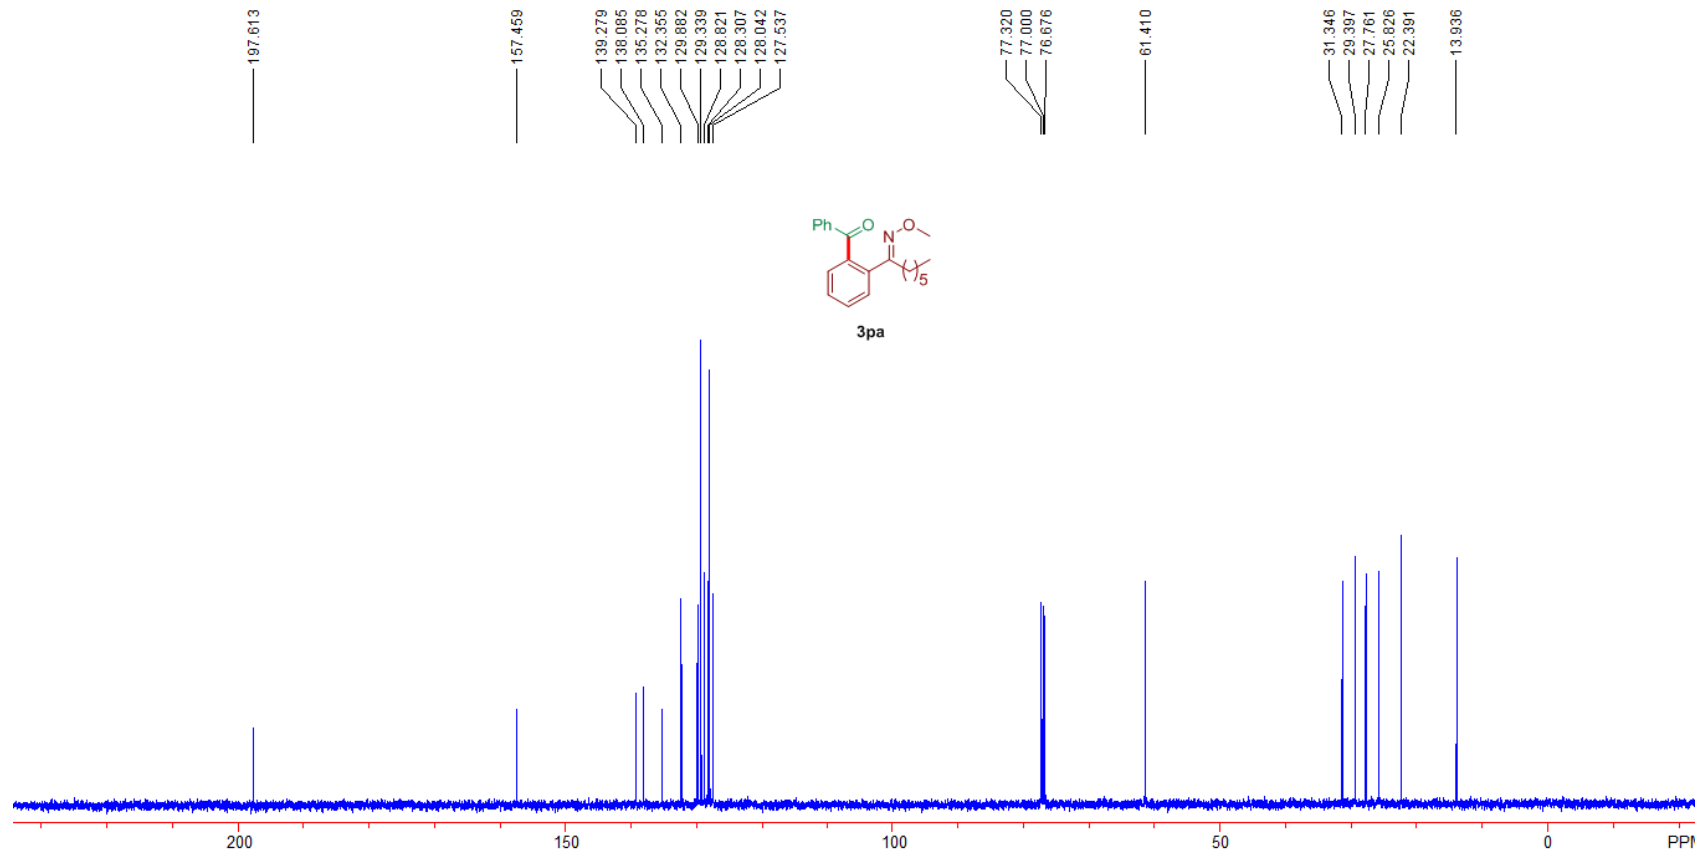

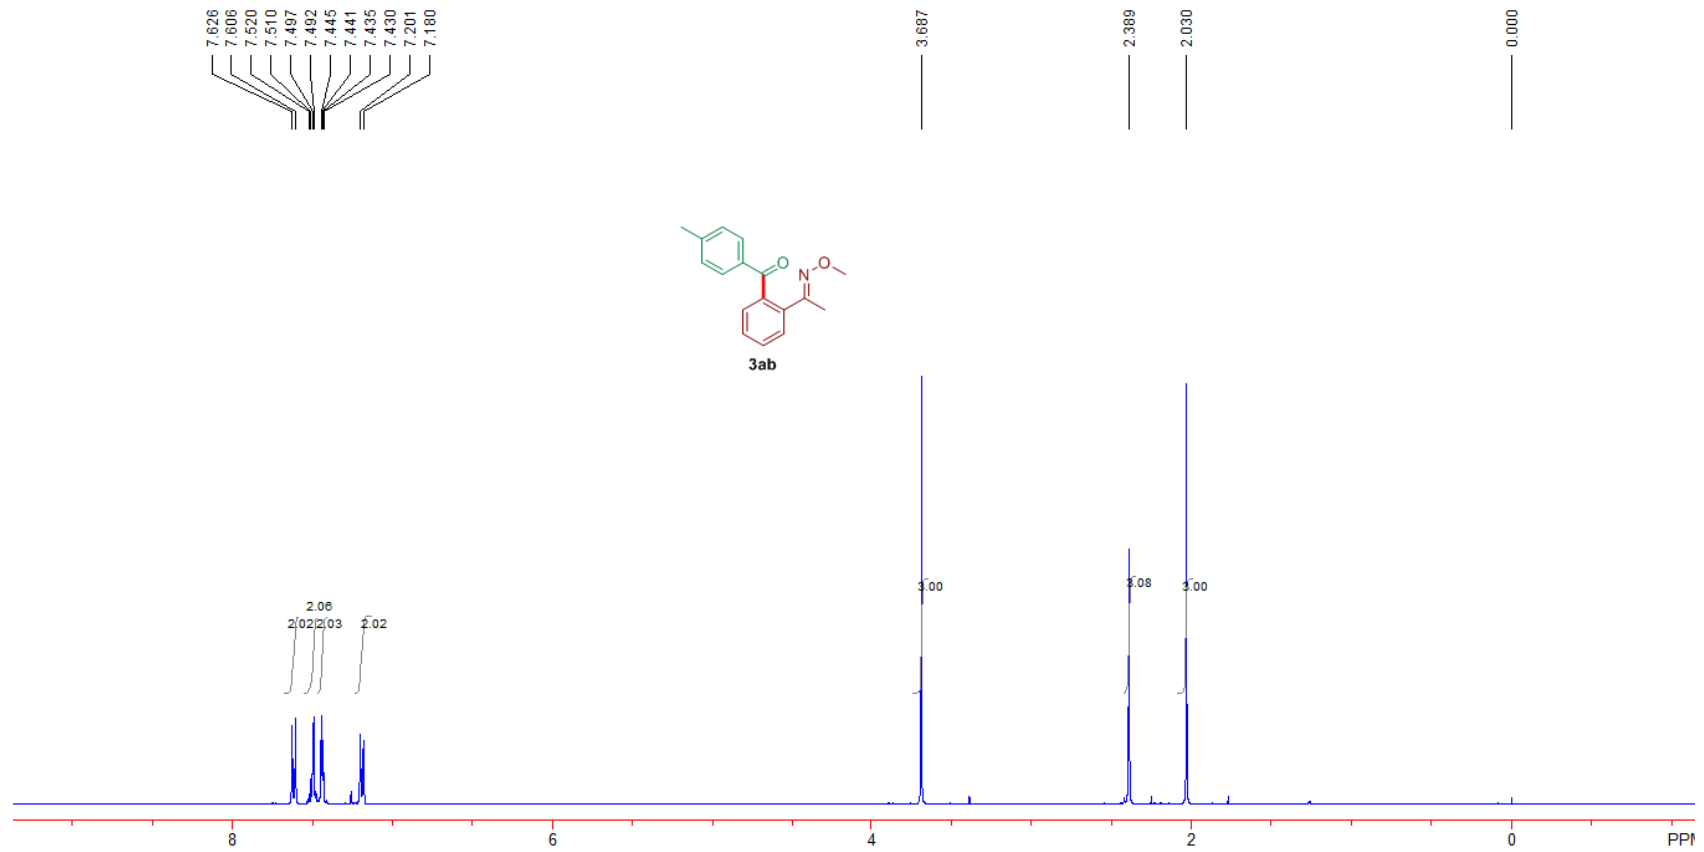

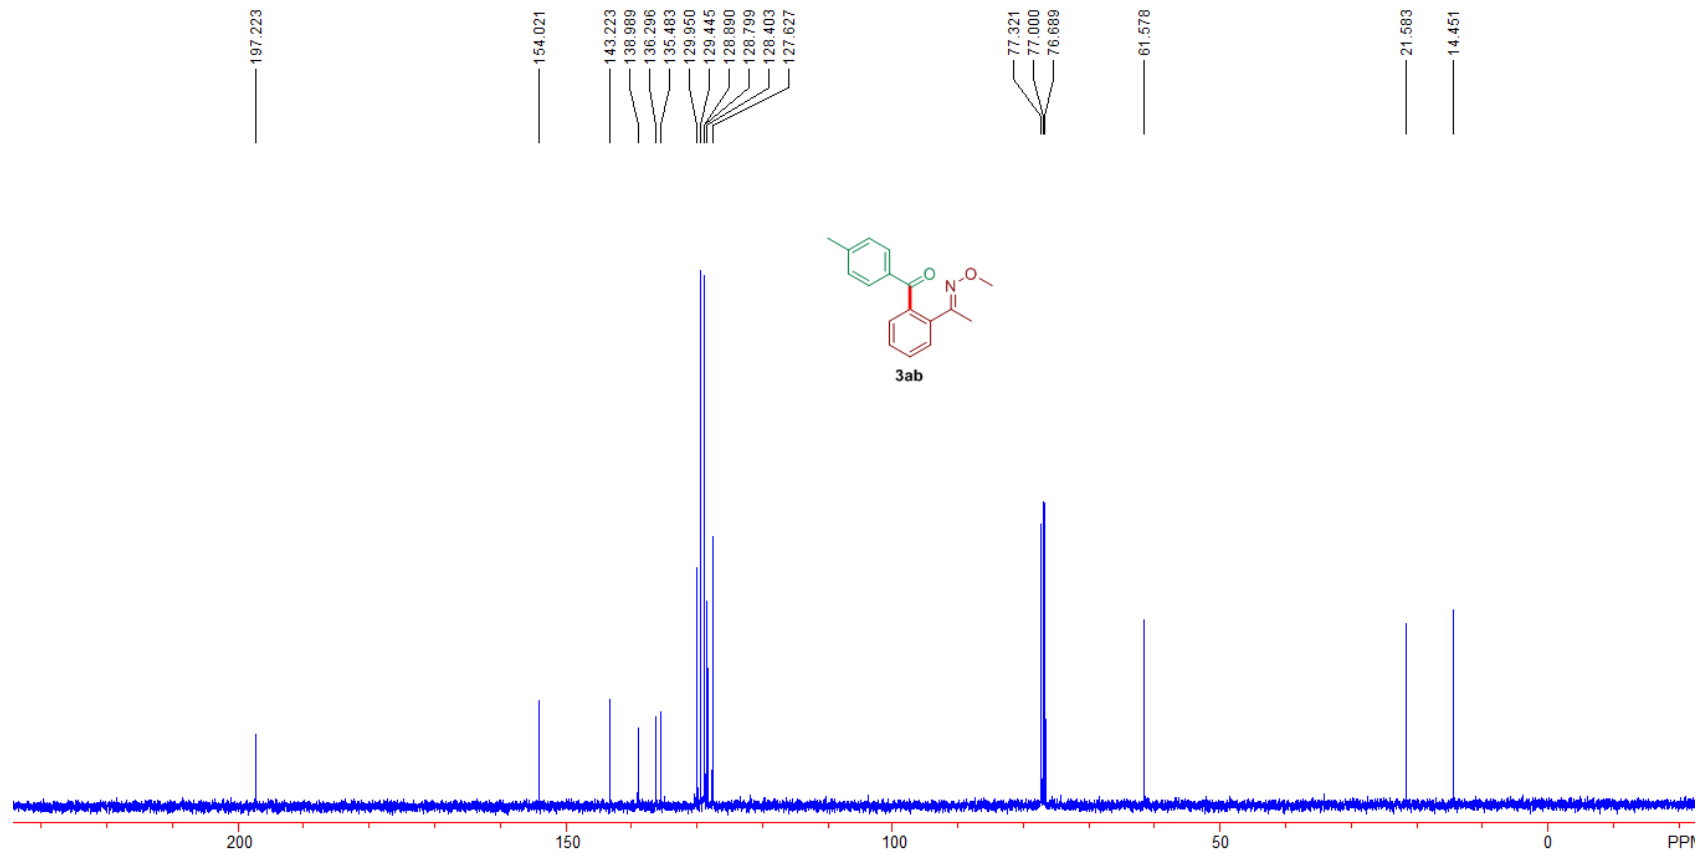

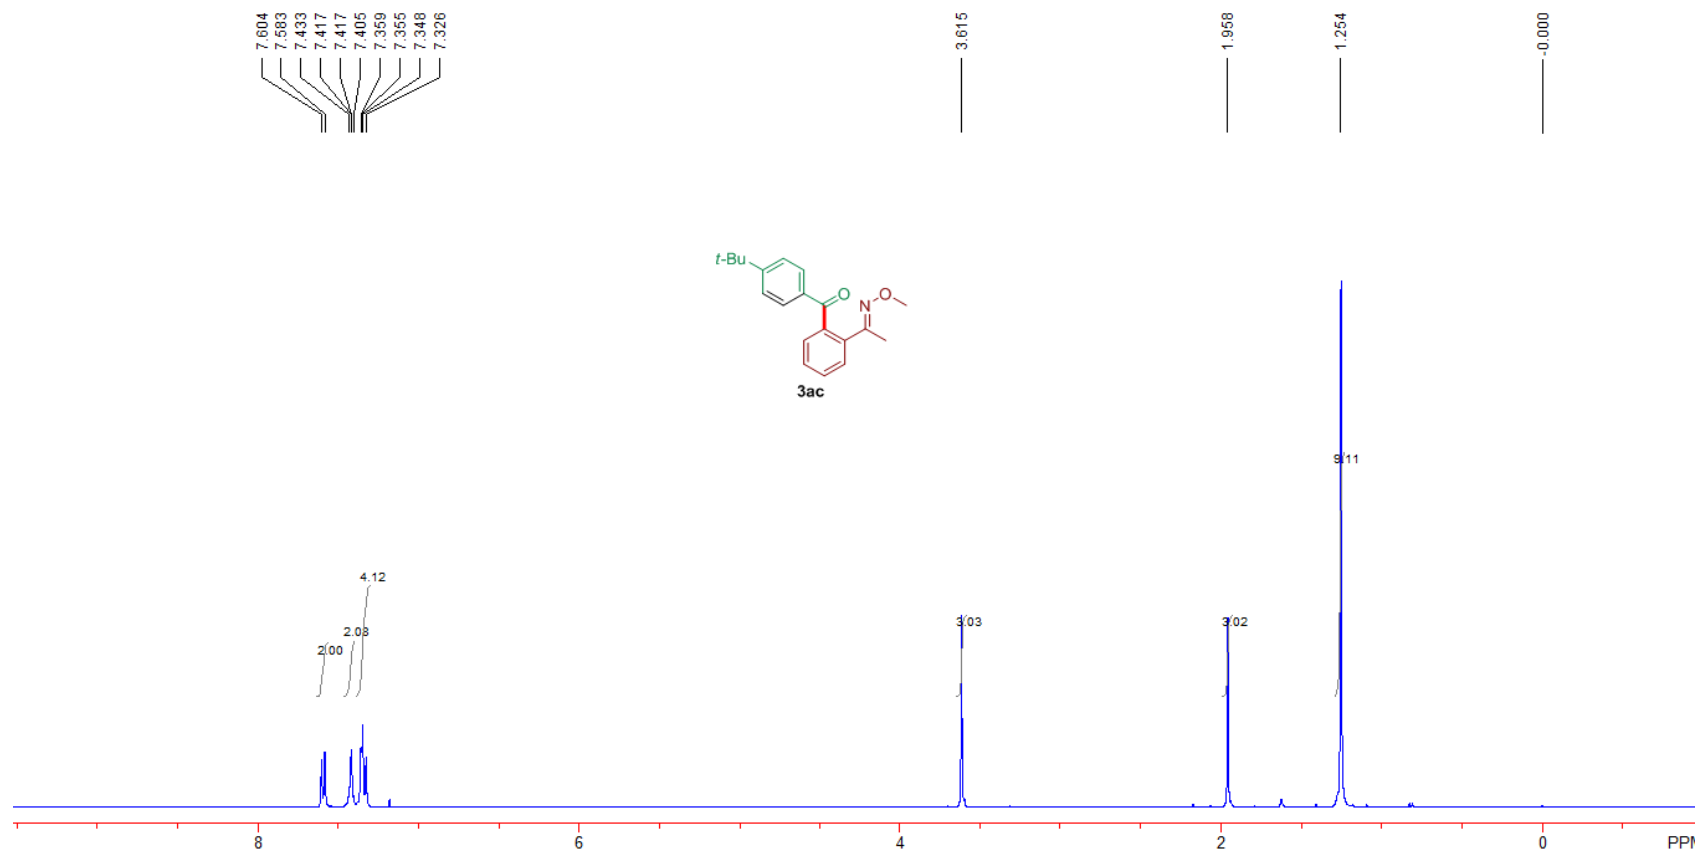

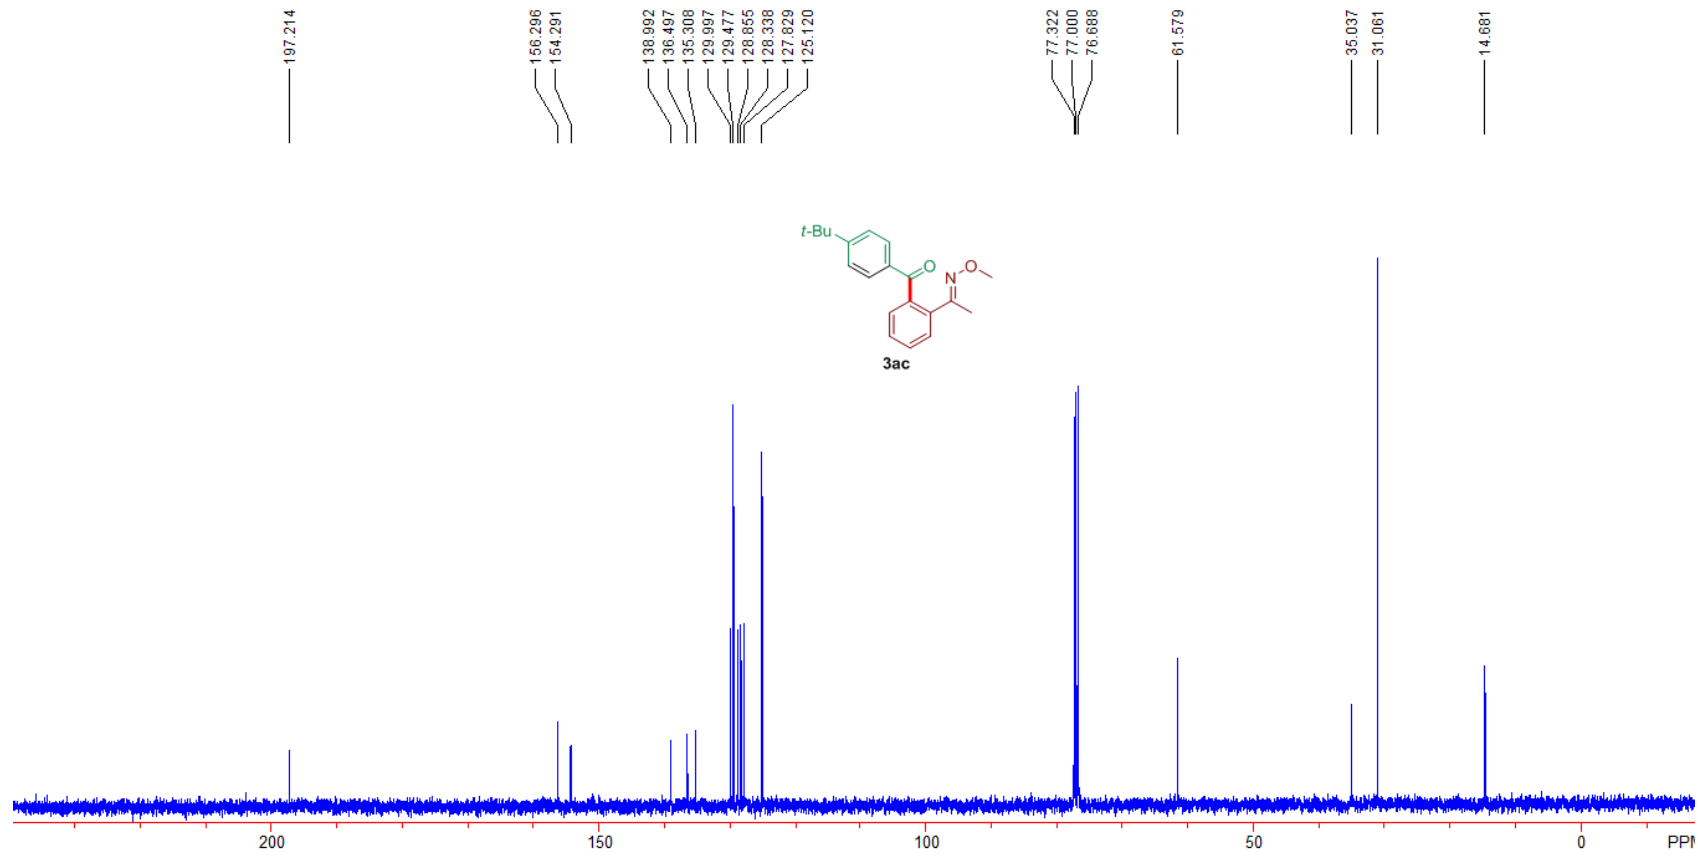

7.557  
7.536  
7.436  
7.430  
7.415  
7.410  
7.363  
7.359  
7.348  
7.344  
7.340  
7.327  
7.279  
7.258

3.565

1.949

0.000

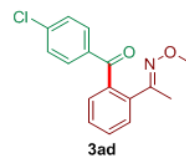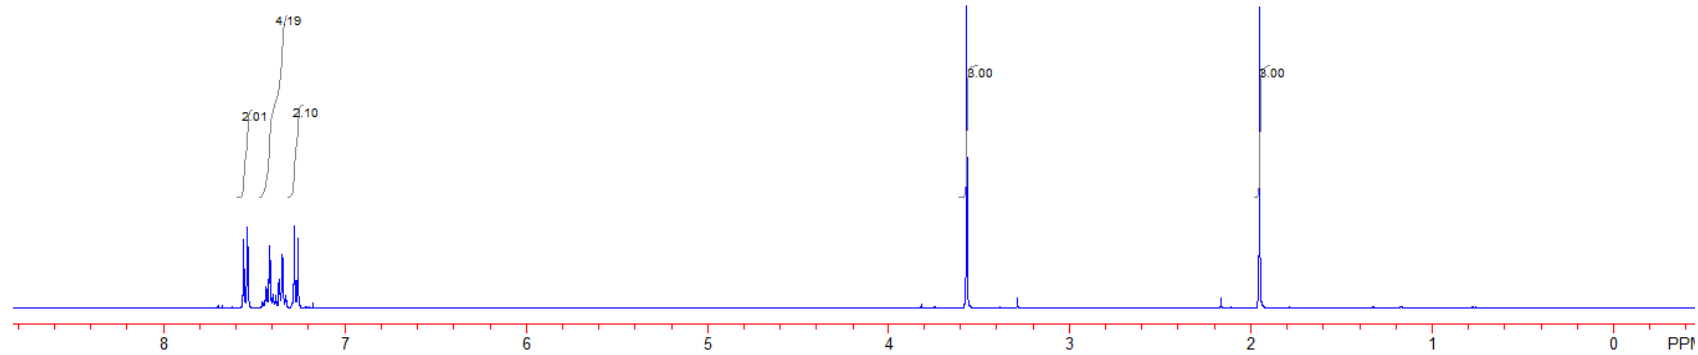



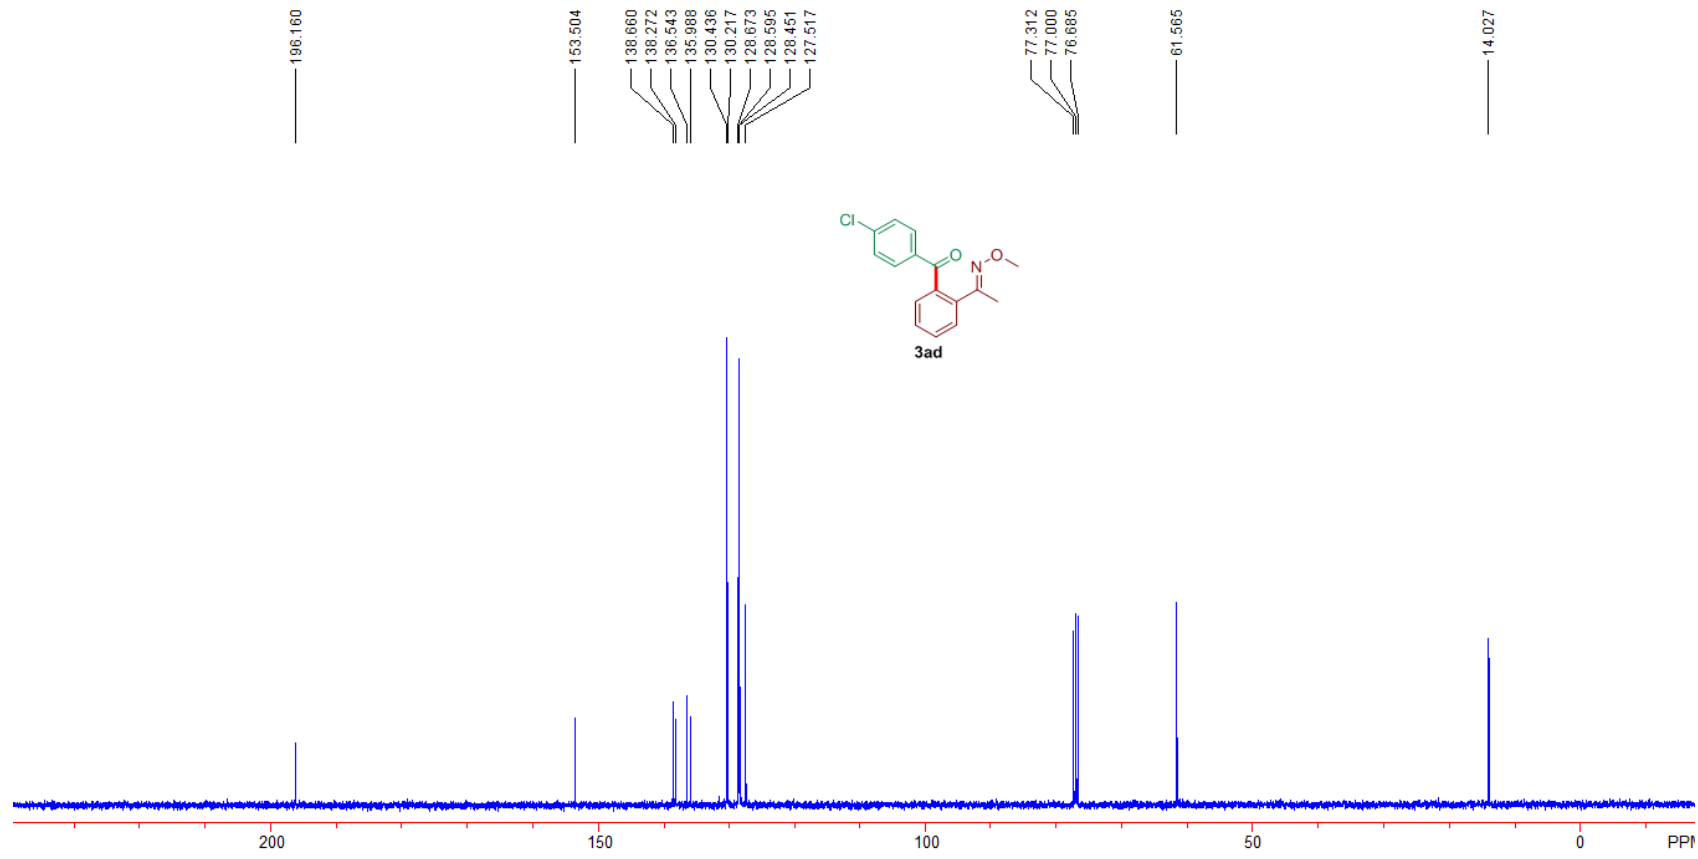

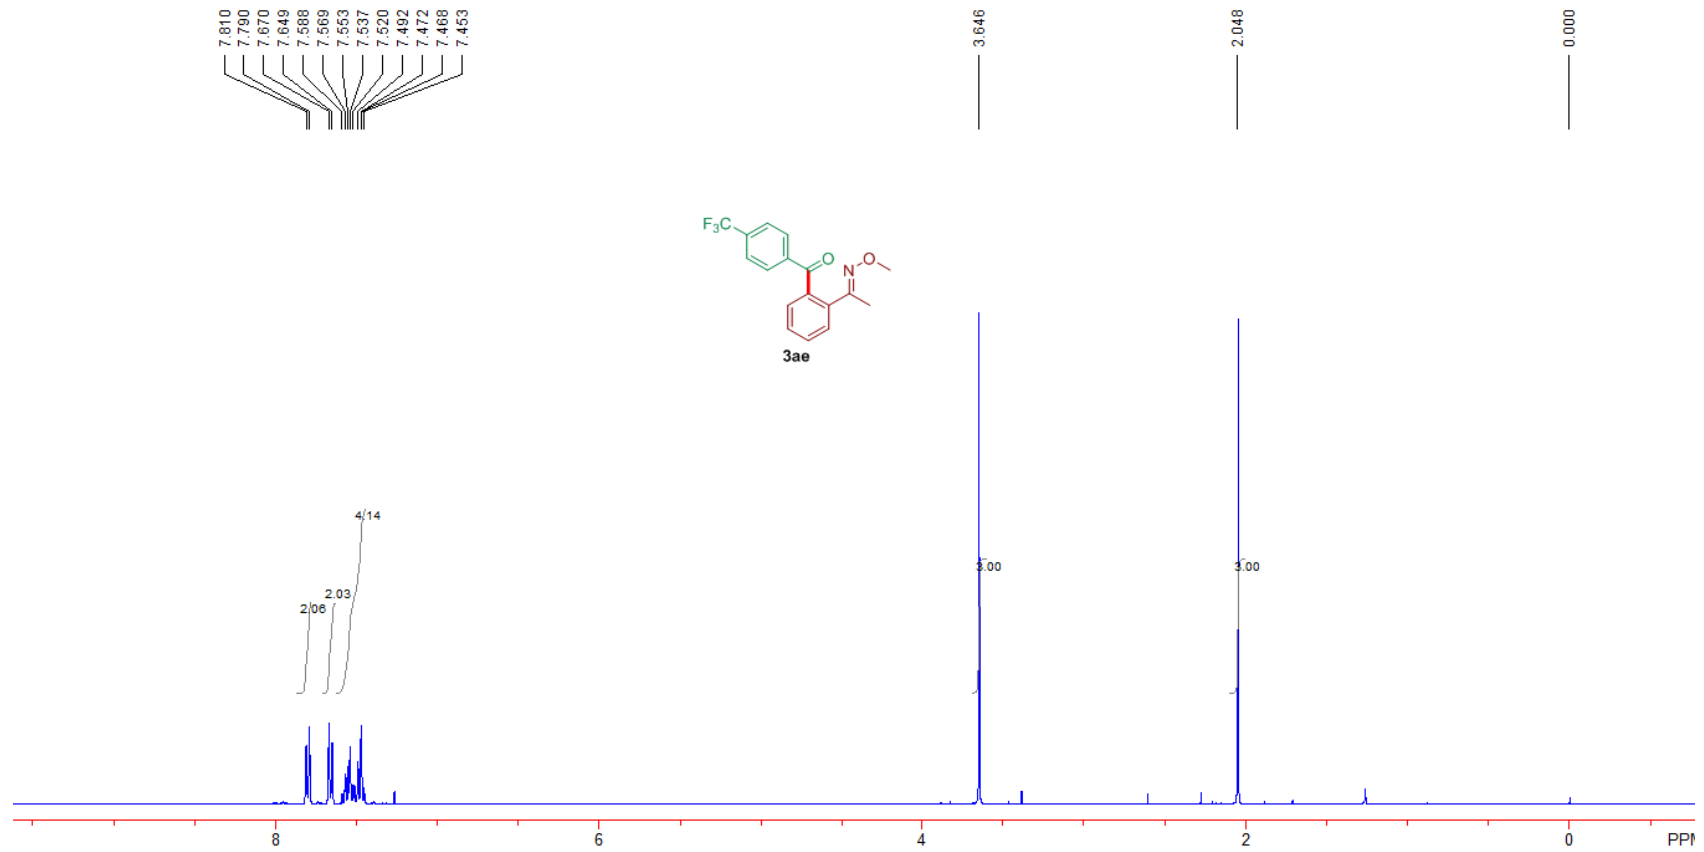

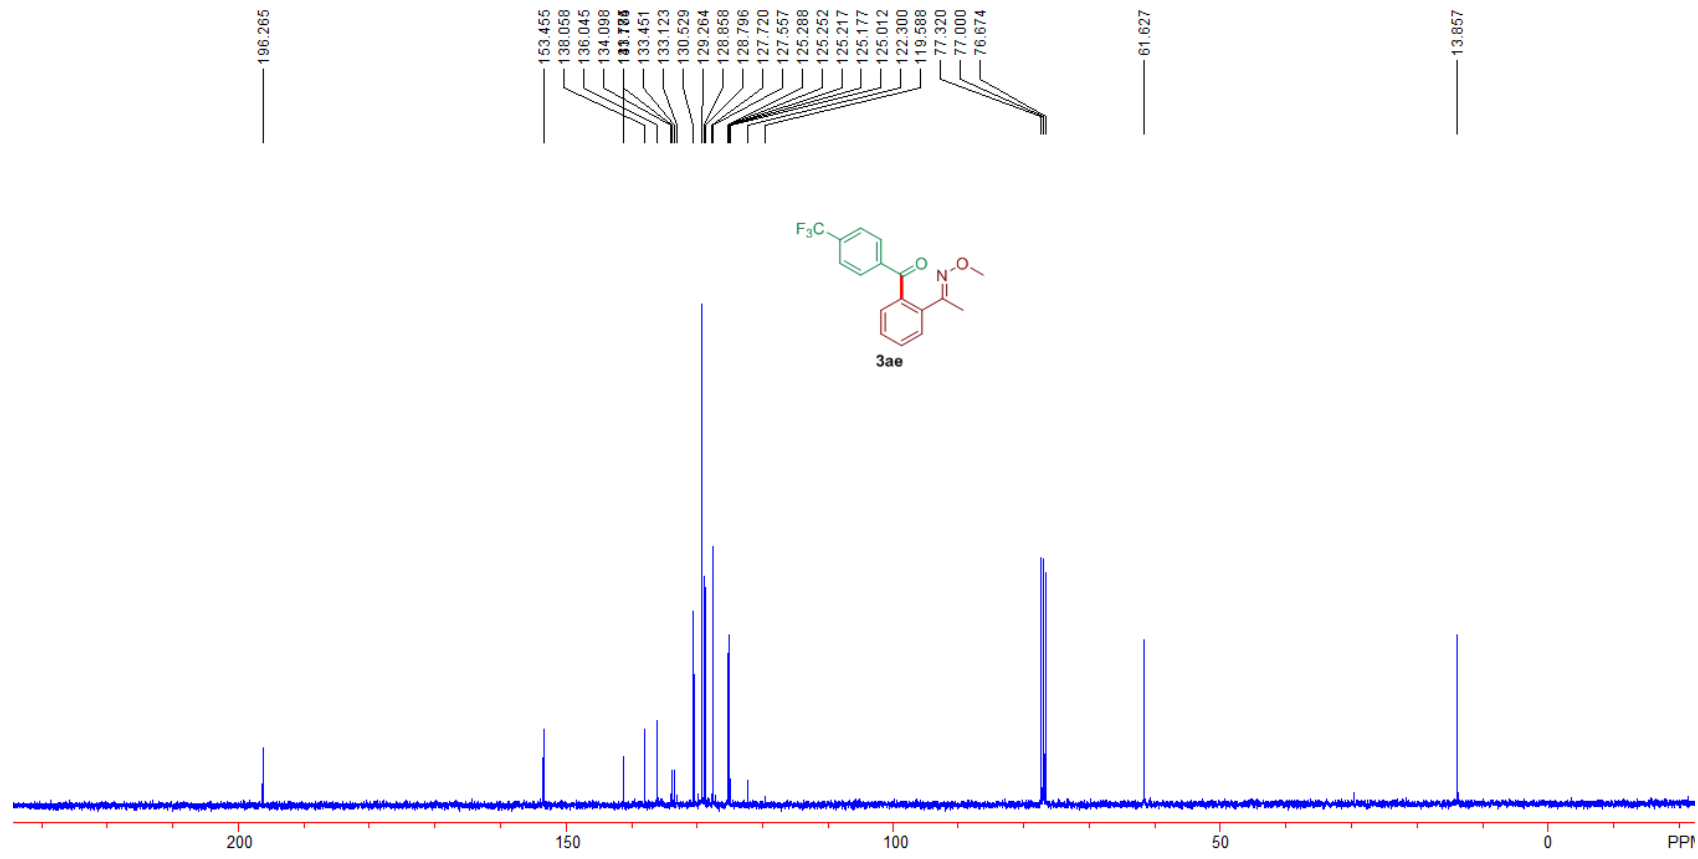

7.777  
7.755  
7.708  
7.687  
7.607  
7.587  
7.545  
7.529  
7.511  
7.494  
7.479  
7.476  
7.461  
7.458

3.633

2.044

0.000

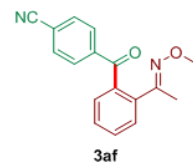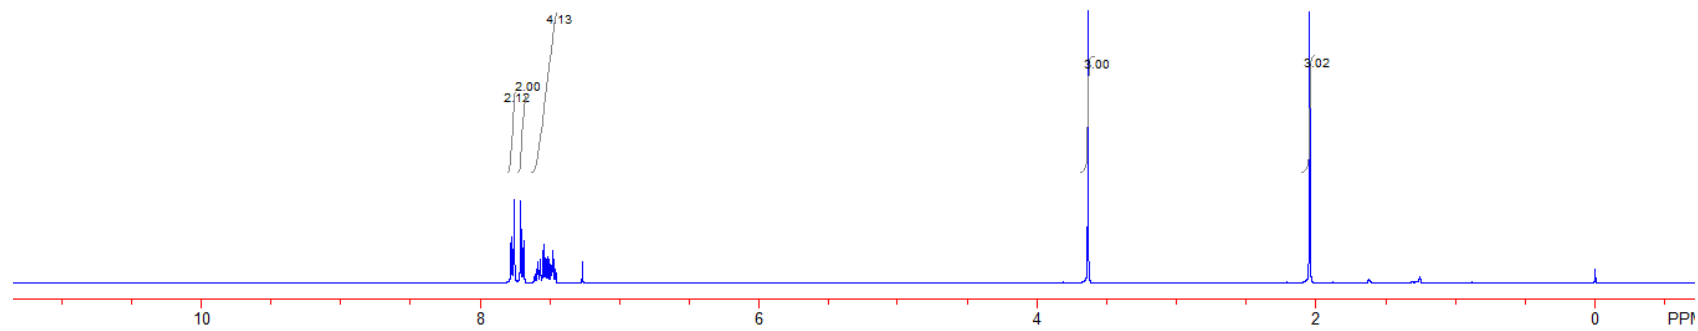

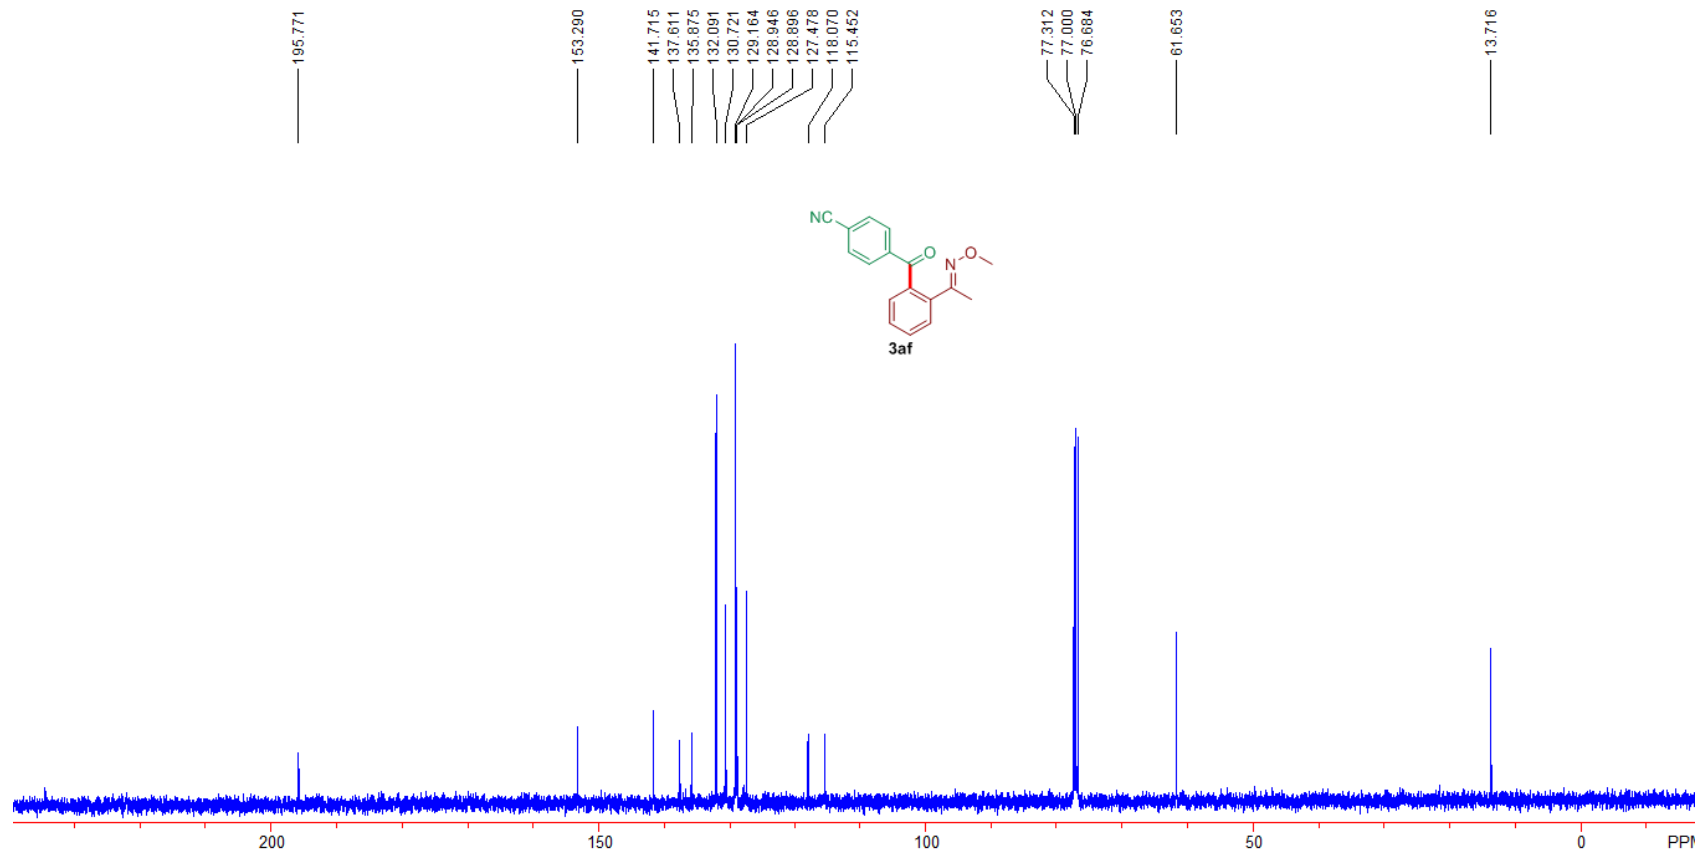

7.571  
7.551  
7.538  
7.530  
7.519  
7.500  
7.480  
7.472  
7.466  
7.463  
7.428  
7.424  
7.415  
7.405  
7.386  
7.372  
7.366  
7.352  
7.346  
7.333  
7.232  
7.223  
7.212  
7.206  
7.192  
7.185

3.673

2.048

-0.000

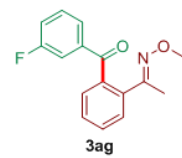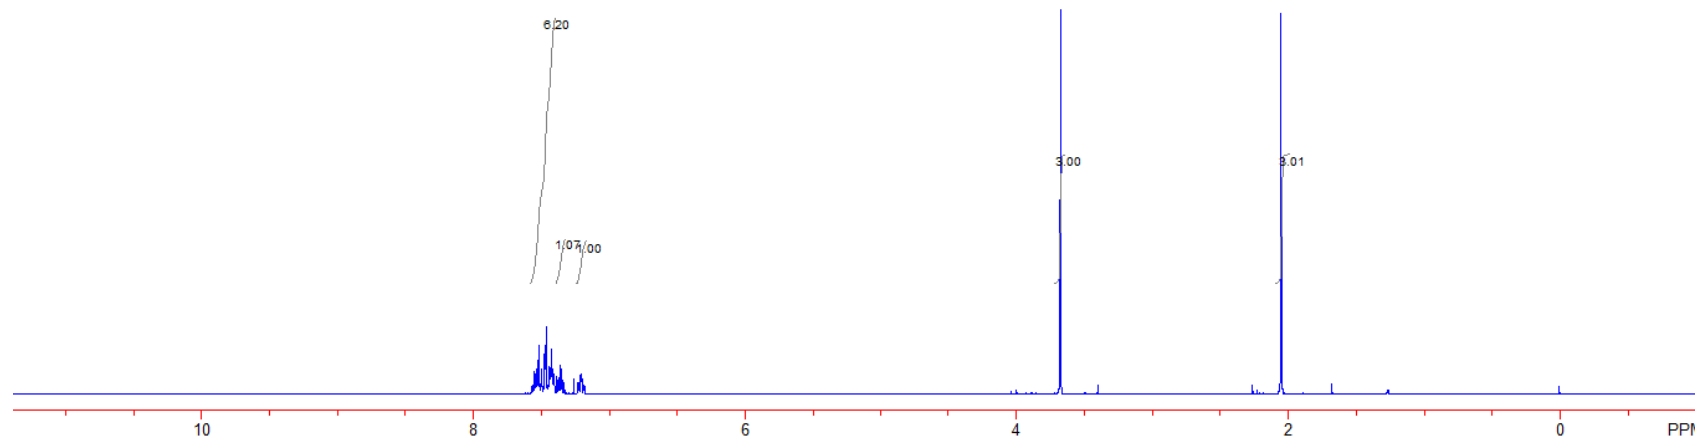

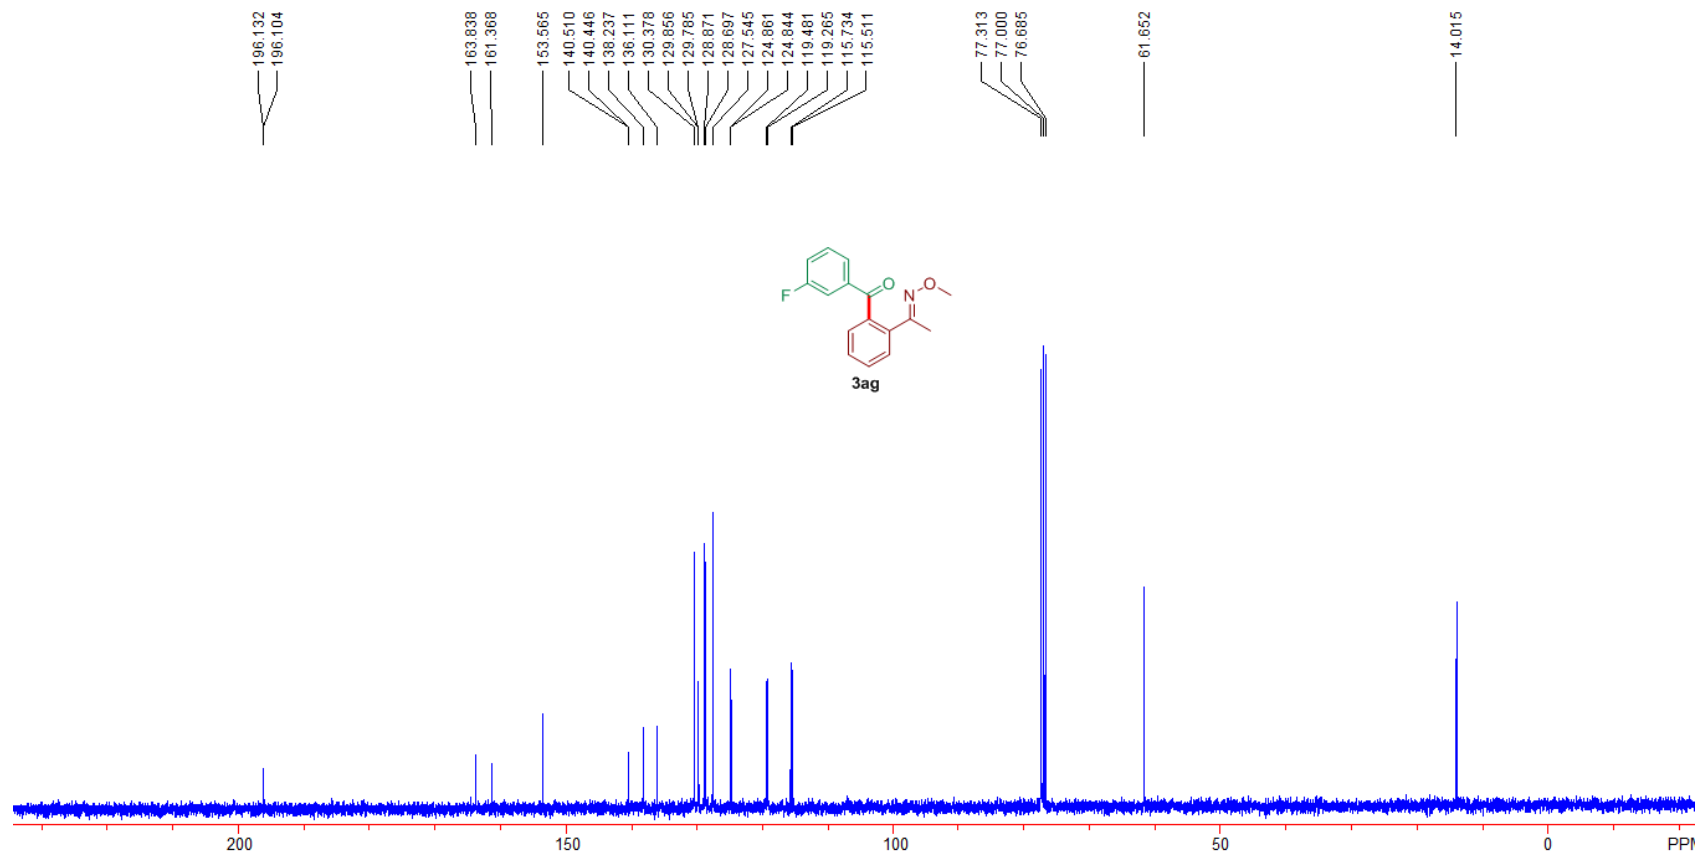

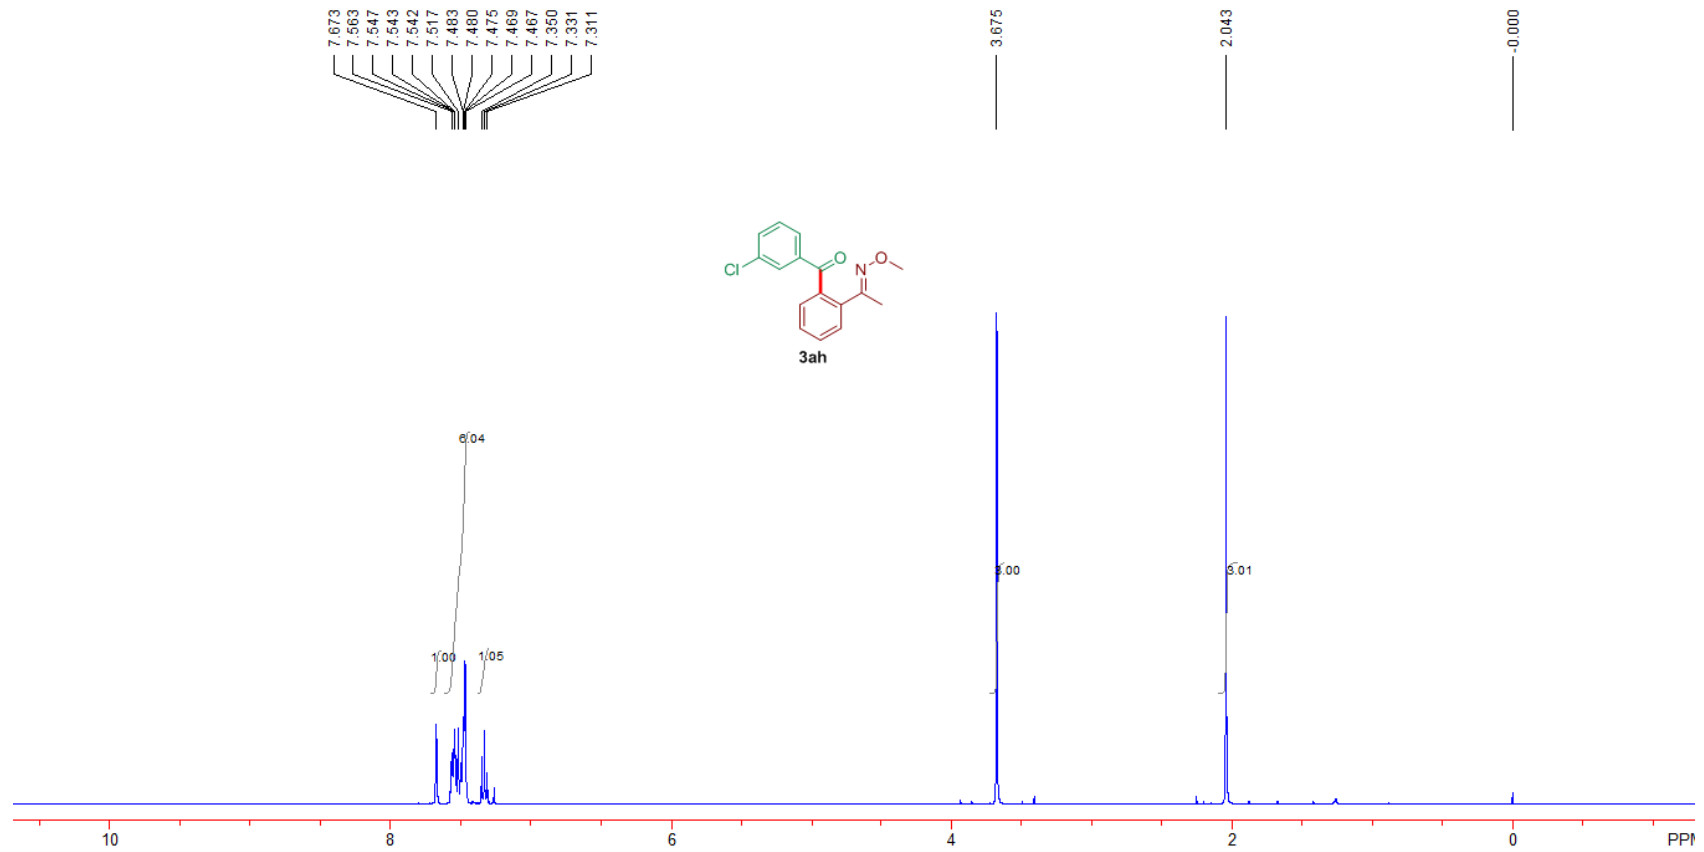



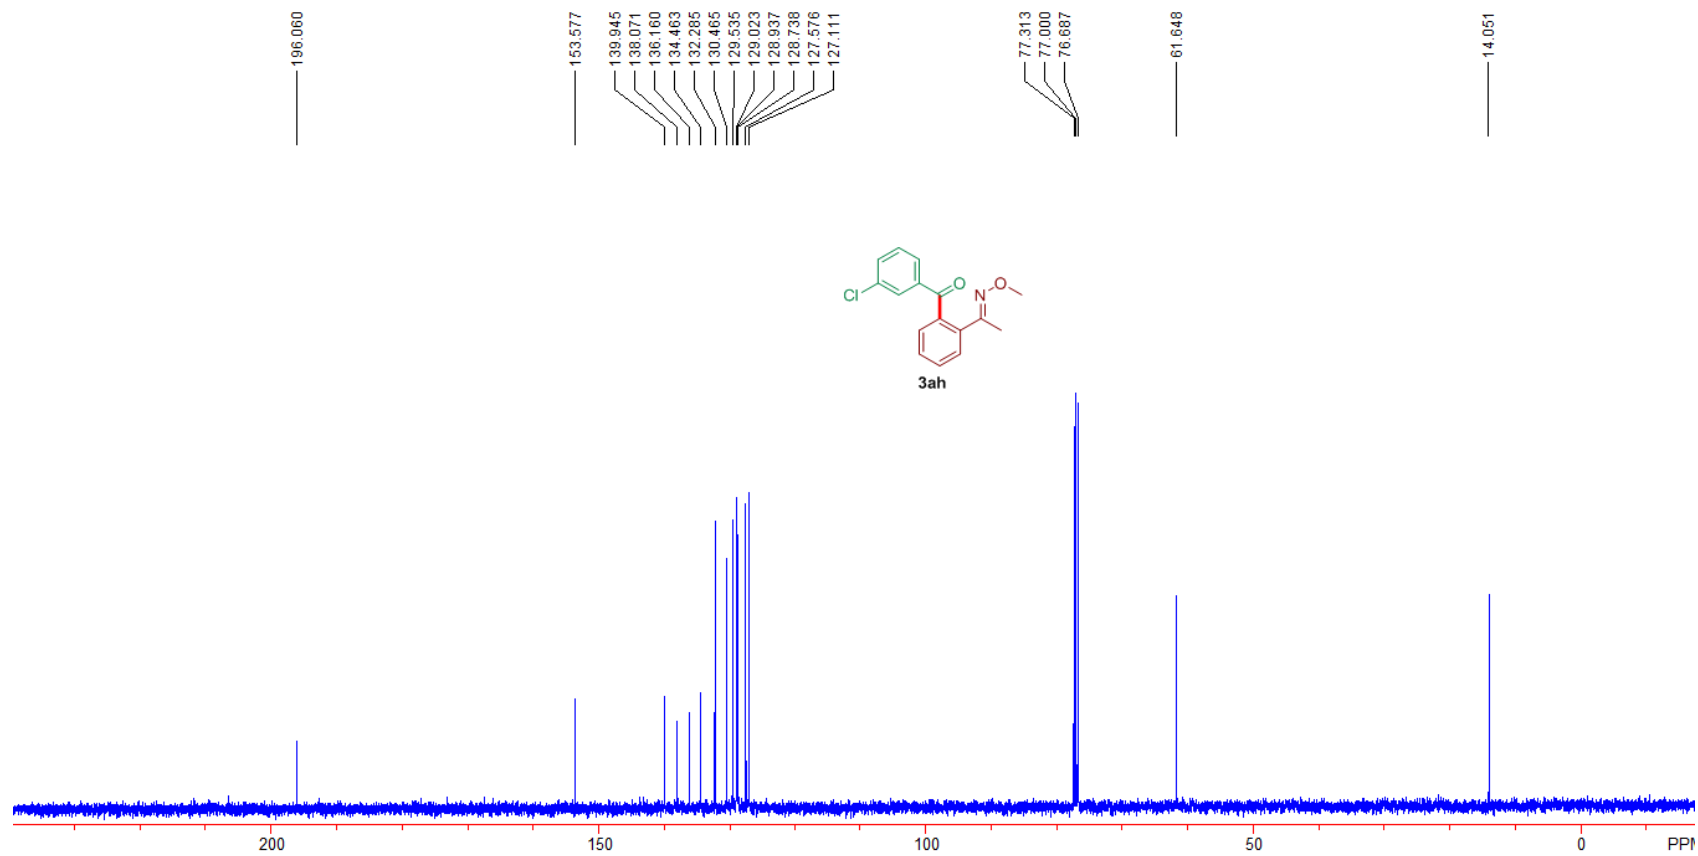

7.539  
7.519  
7.504  
7.499  
7.478  
7.461  
7.447  
7.427  
7.341  
7.291  
7.272  
7.252  
7.185  
7.166  
7.071  
7.063

3.811  
3.699

2.030

-0.000

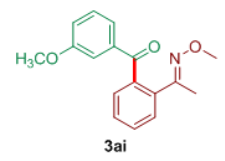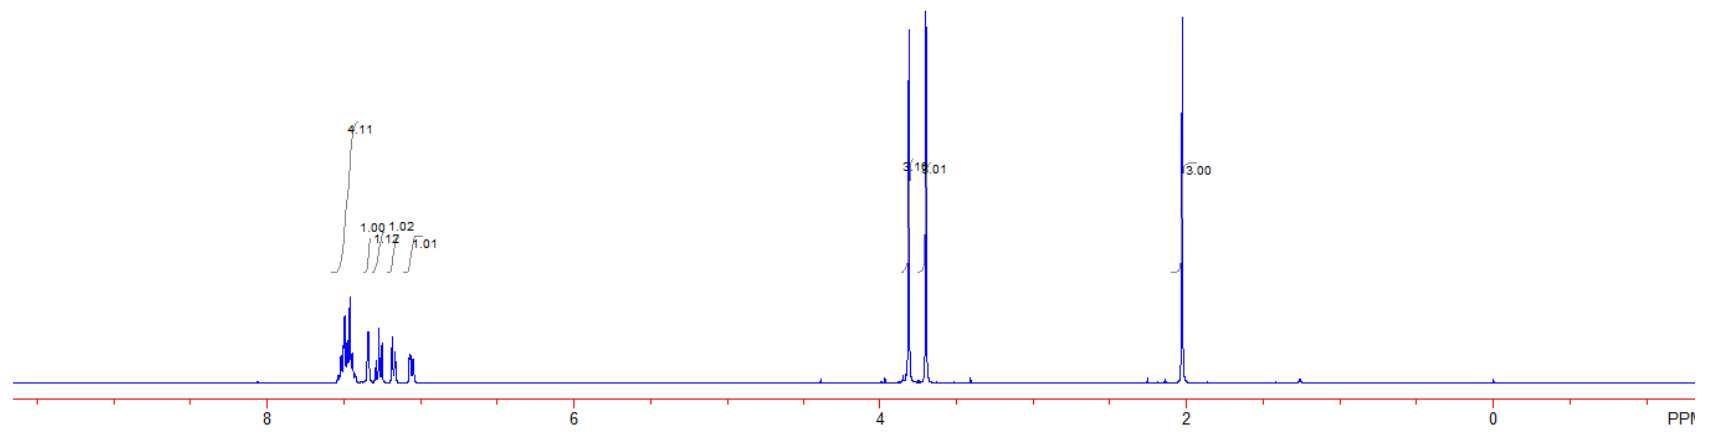

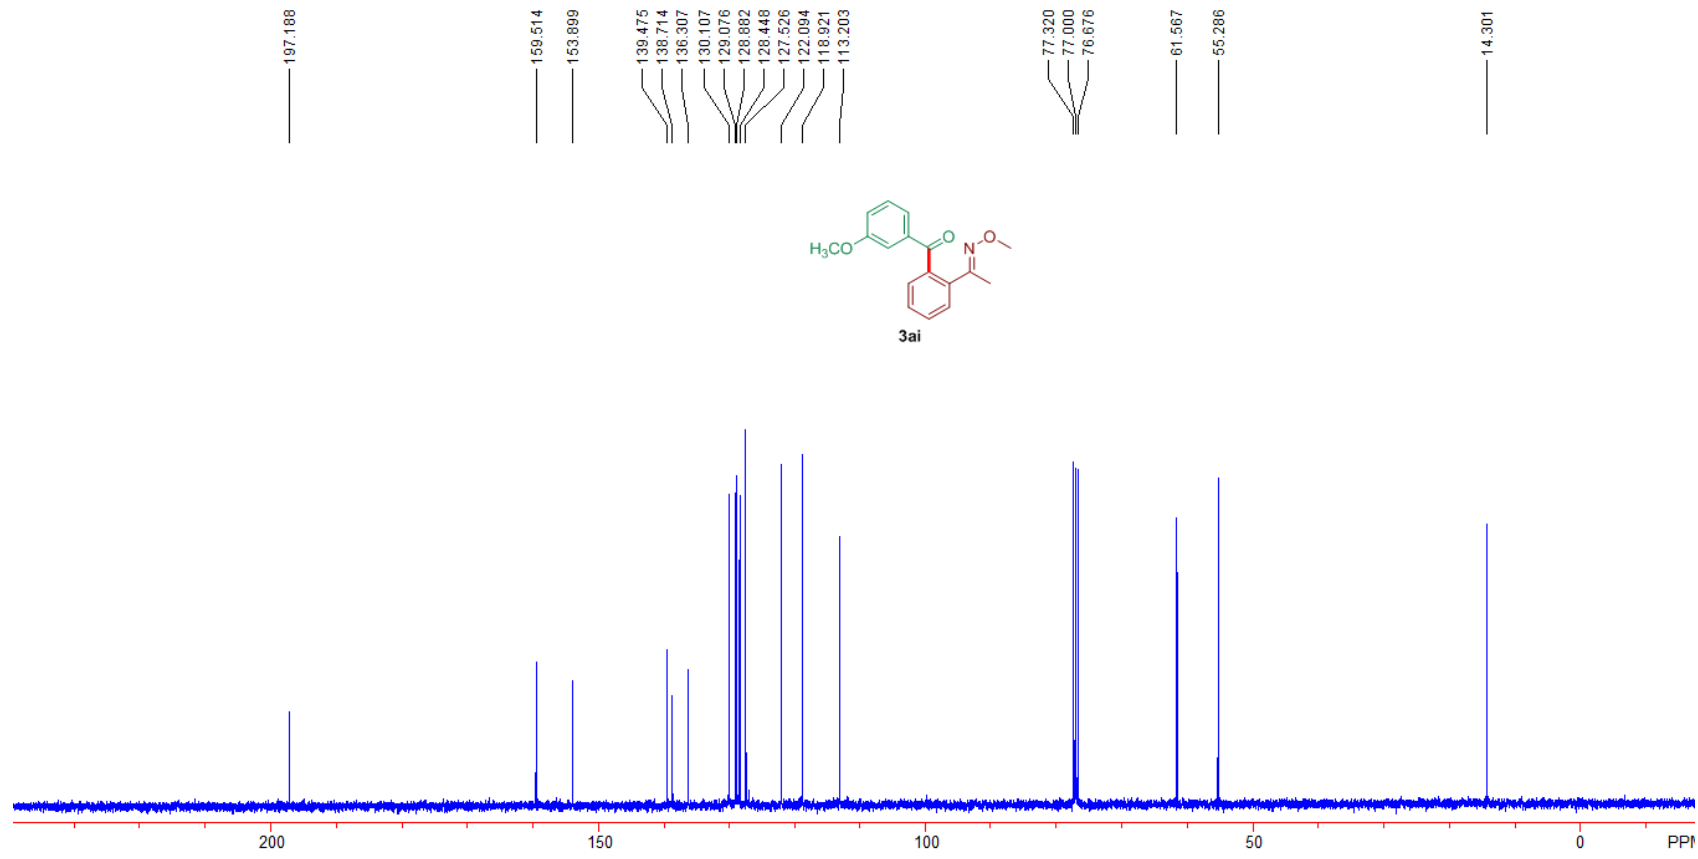

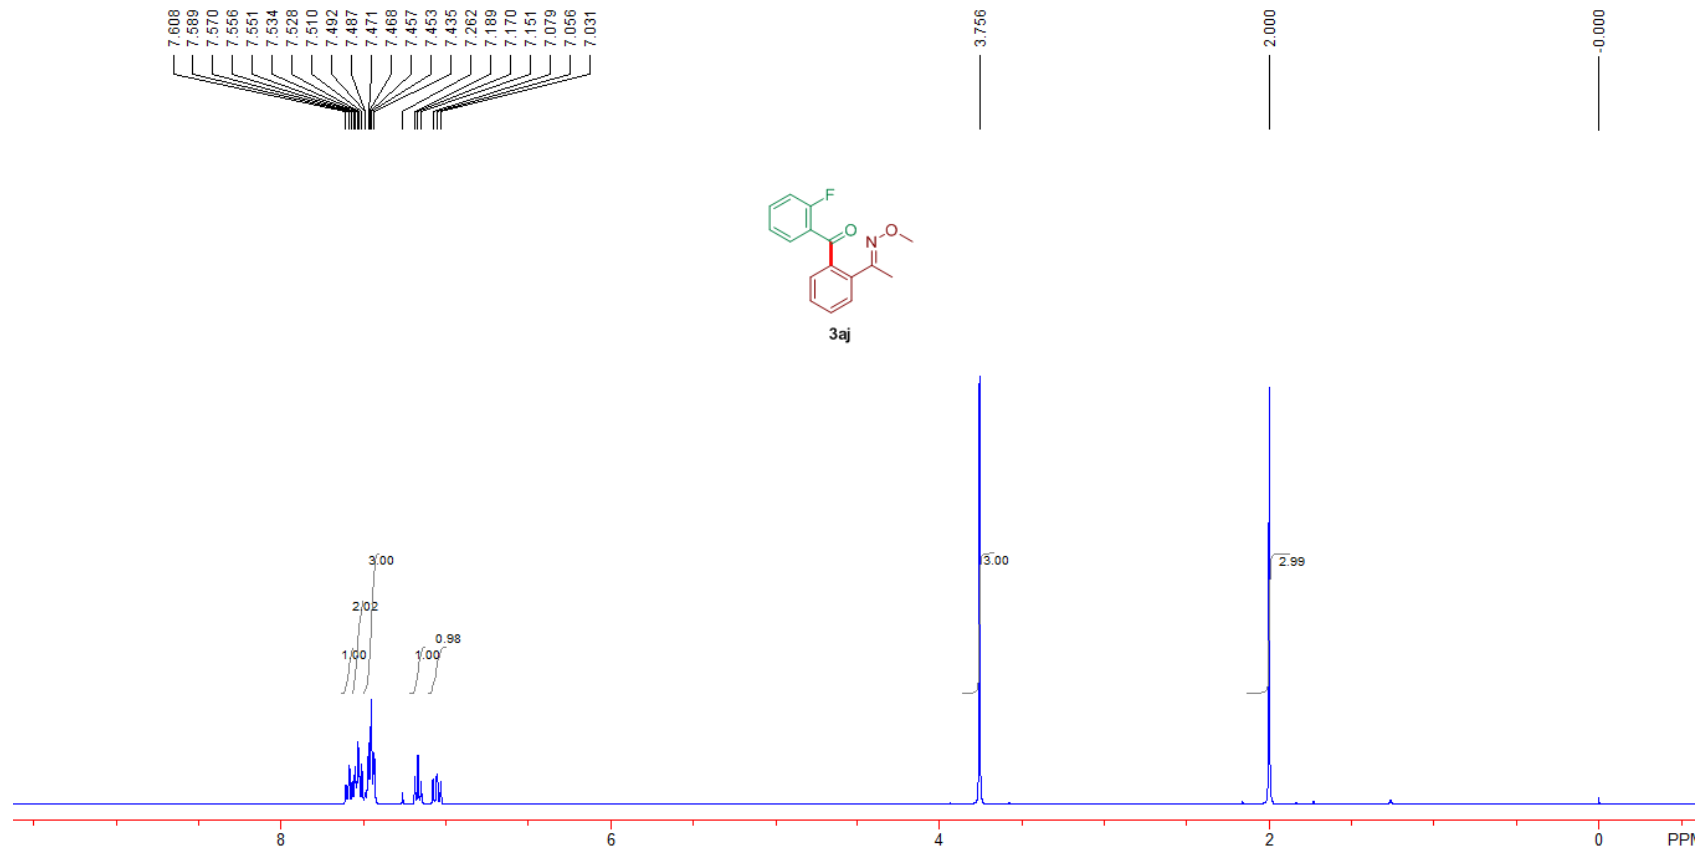

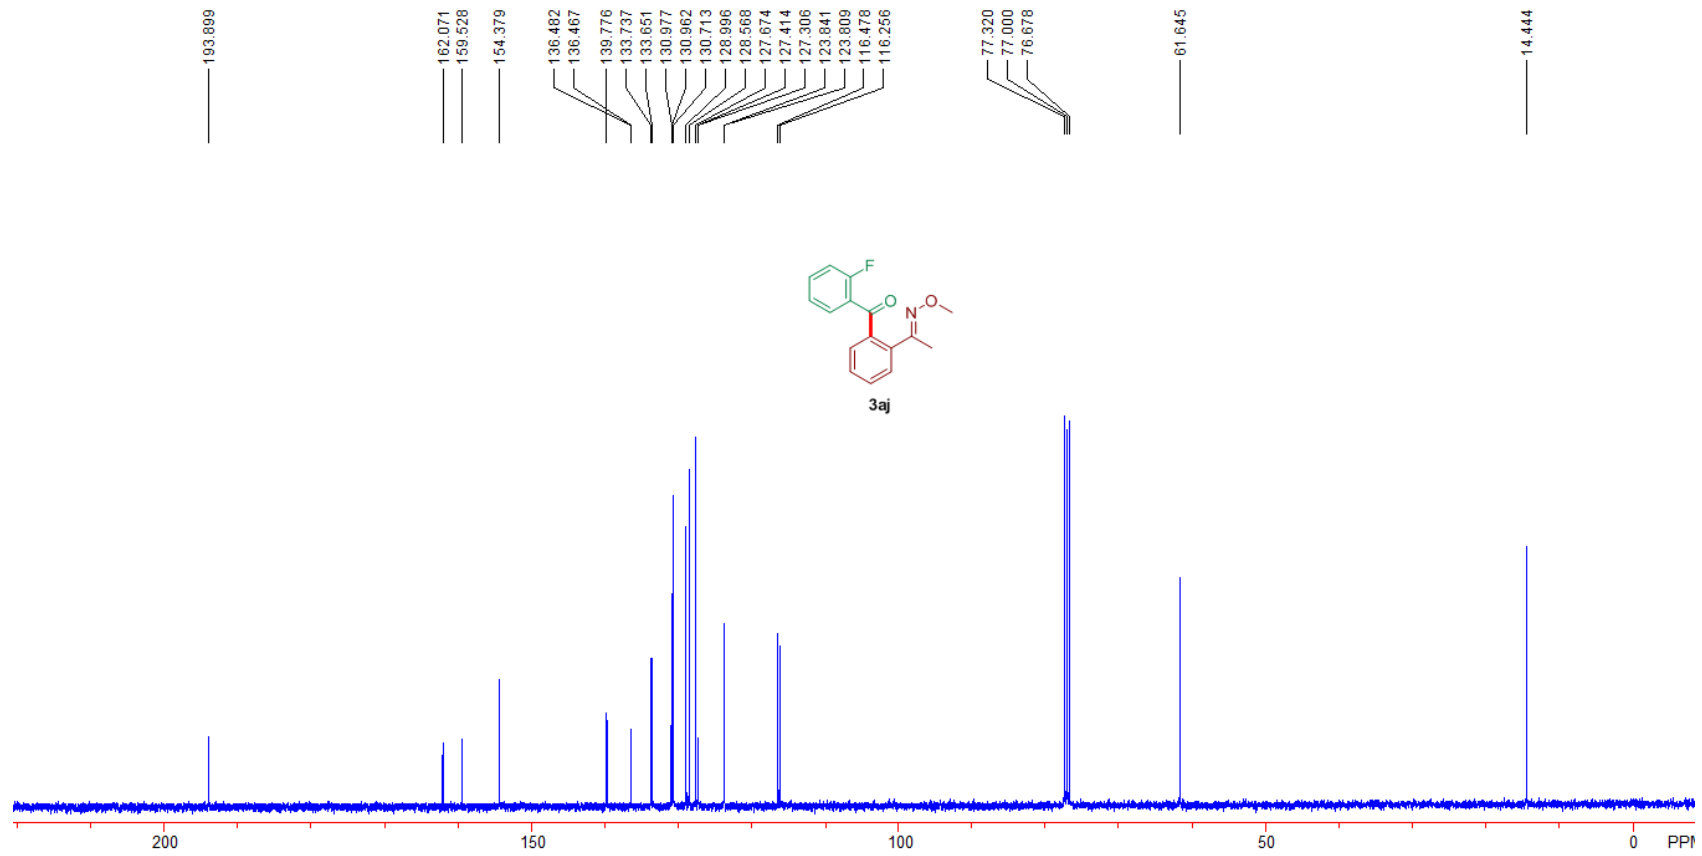

7.573  
7.566  
7.564  
7.546  
7.528  
7.458  
7.437  
7.428  
7.406  
7.400  
7.398  
7.382  
7.377  
7.364  
7.295  
7.291  
7.279  
7.273  
7.263  
7.255

3.875

1.985

-0.000

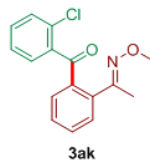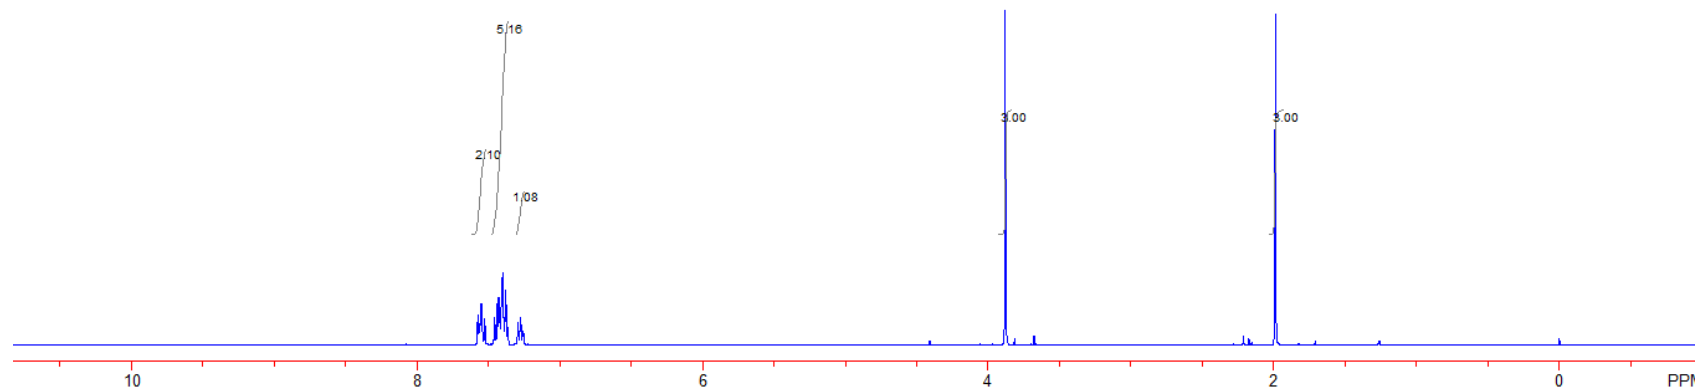

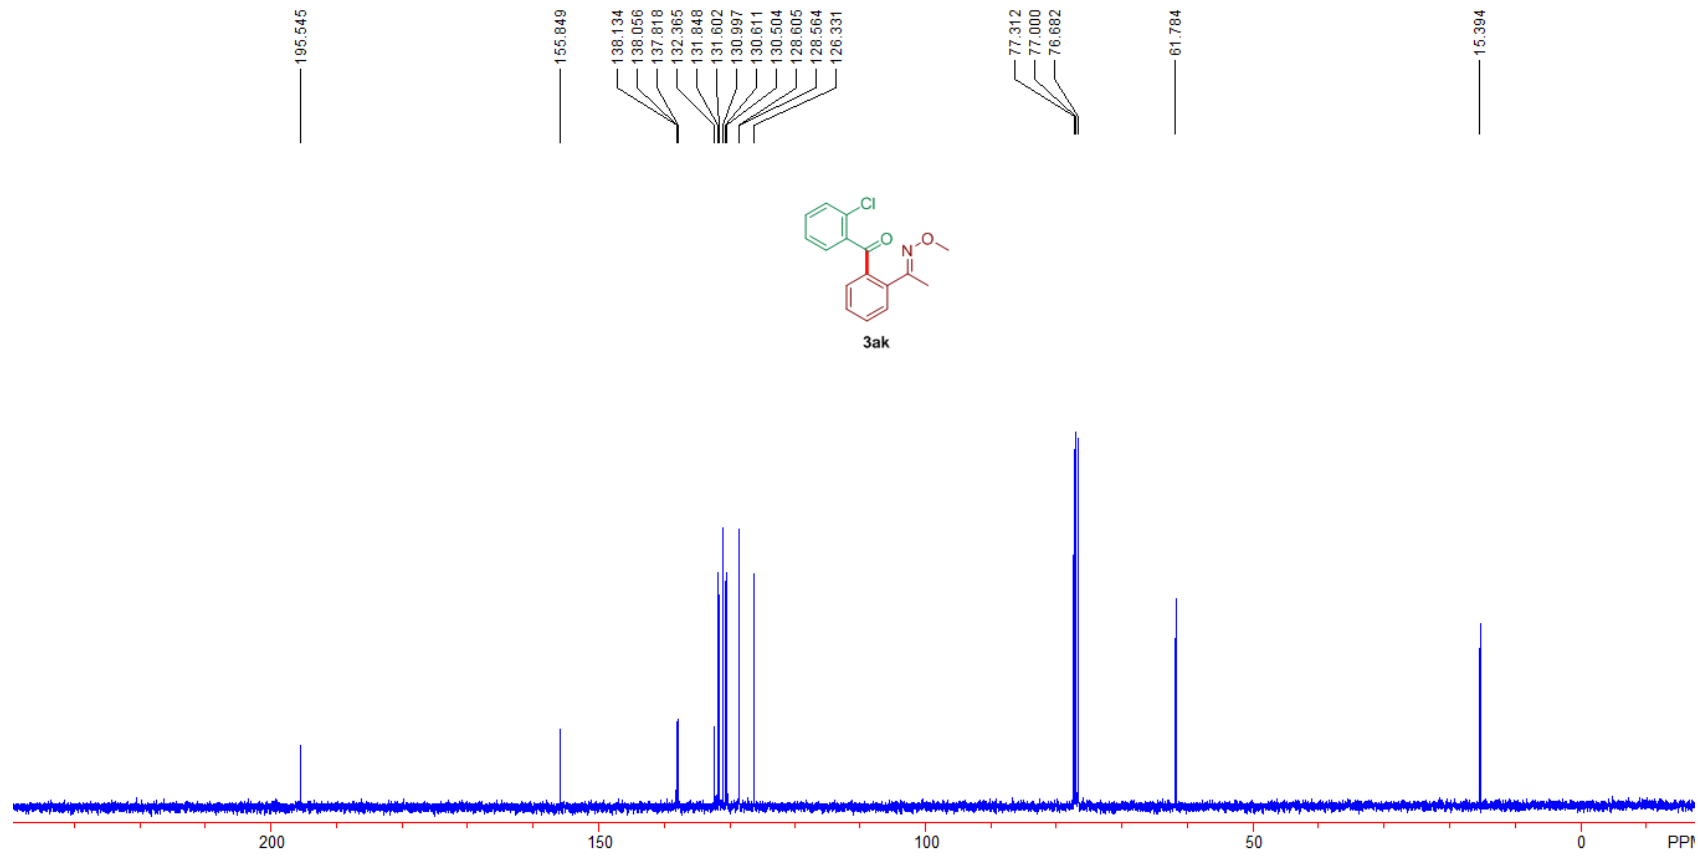

8.076  
7.968  
7.937  
7.886  
7.874  
7.865  
7.854  
7.832  
7.812  
7.583  
7.566  
7.547  
7.529  
7.508  
7.490  
7.473

3.627

2.013

0.000

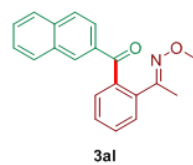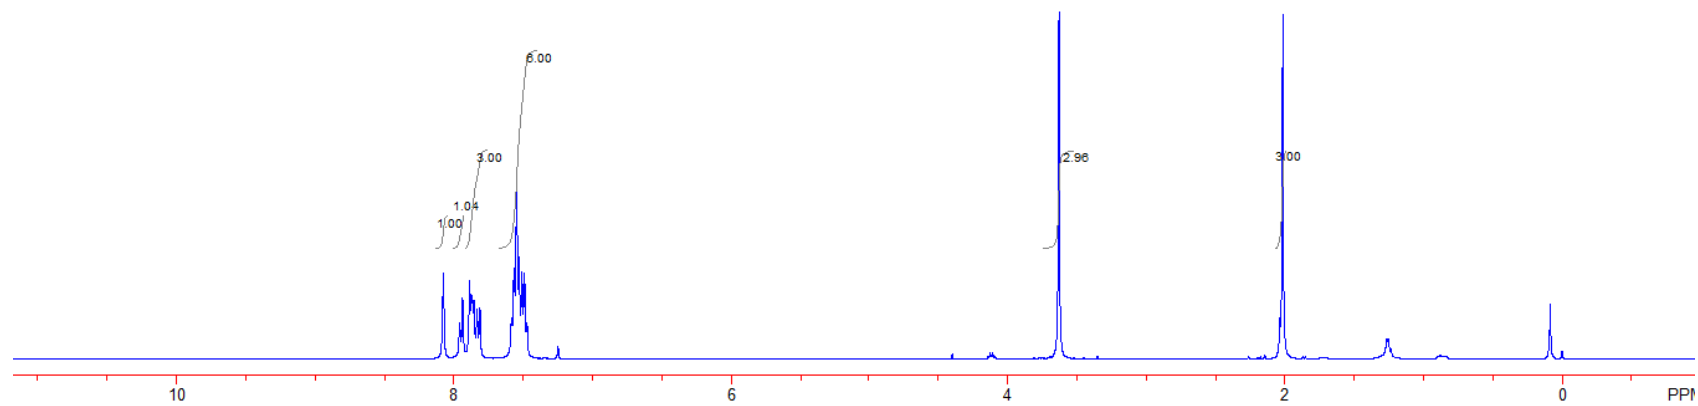



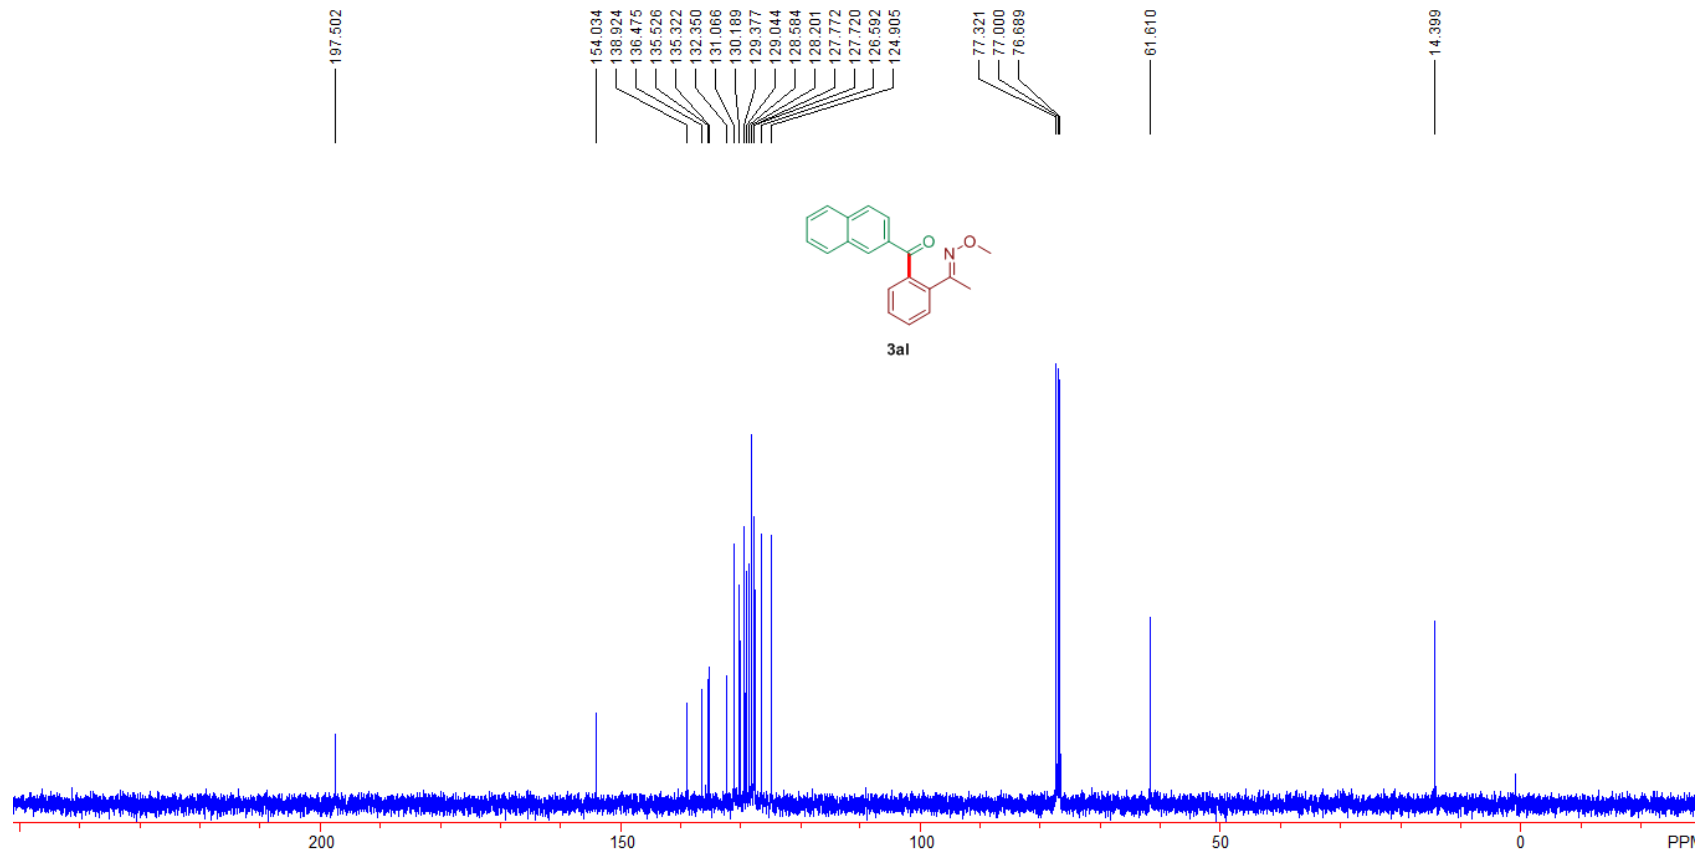

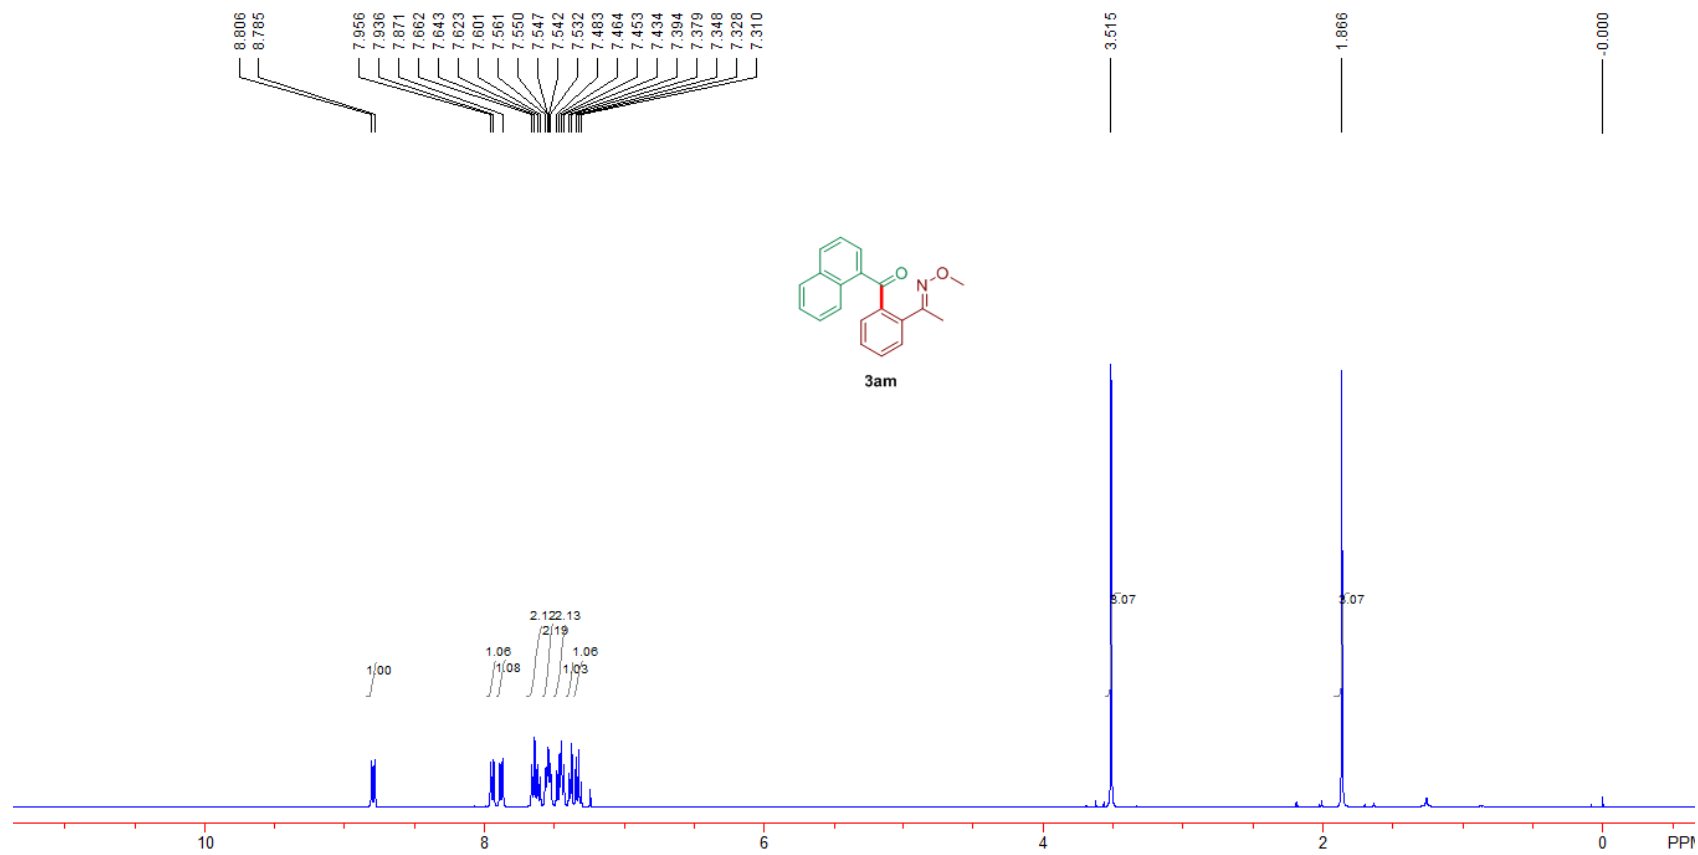

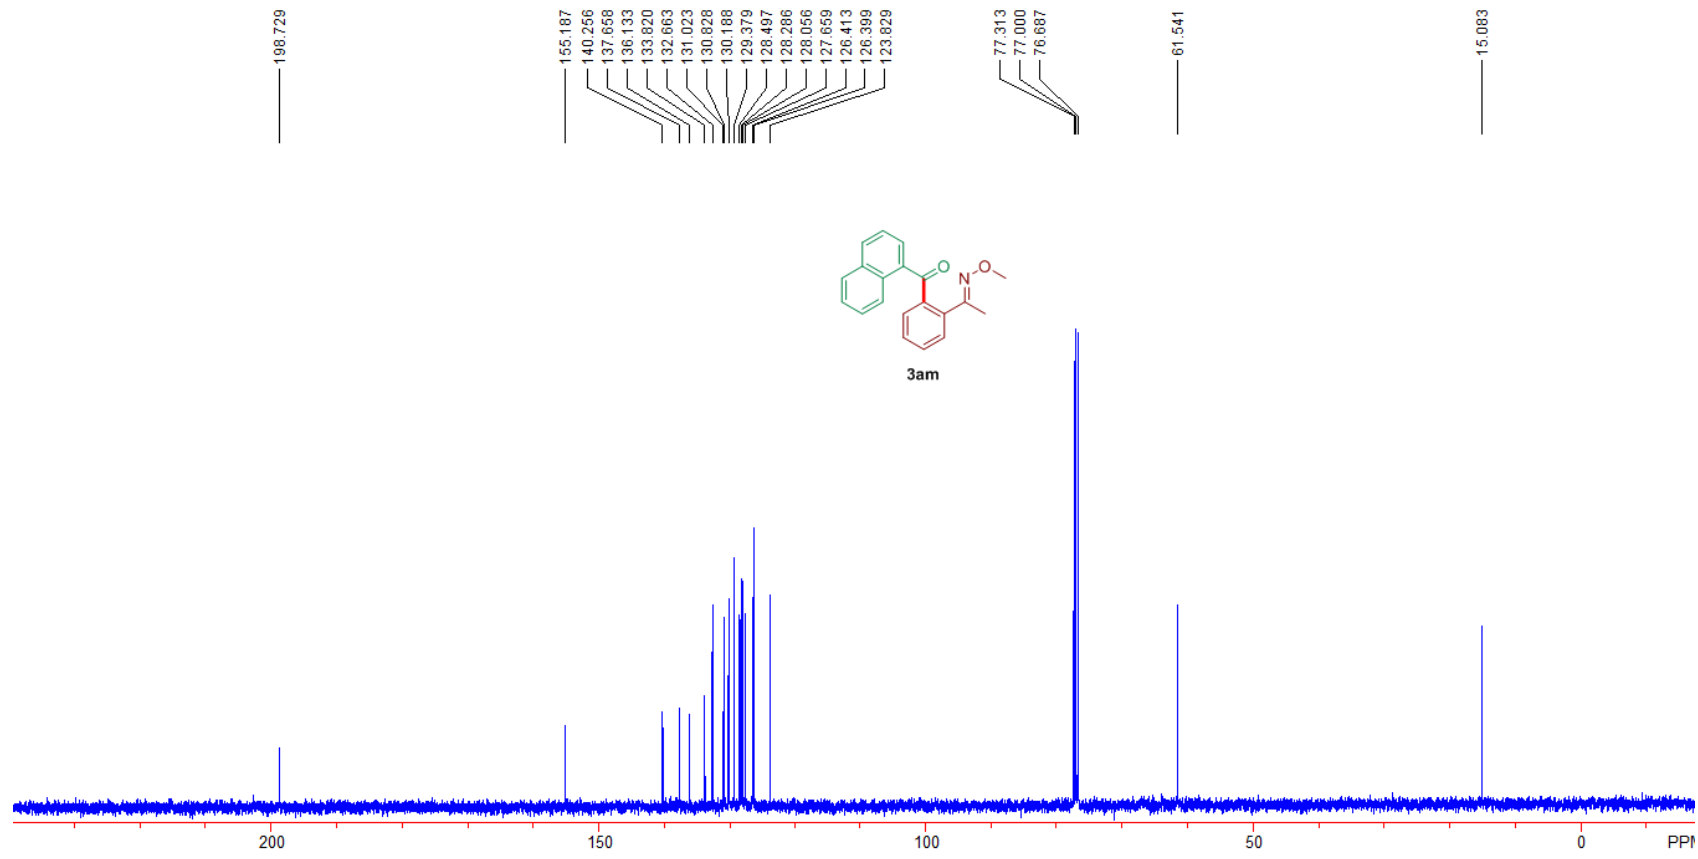

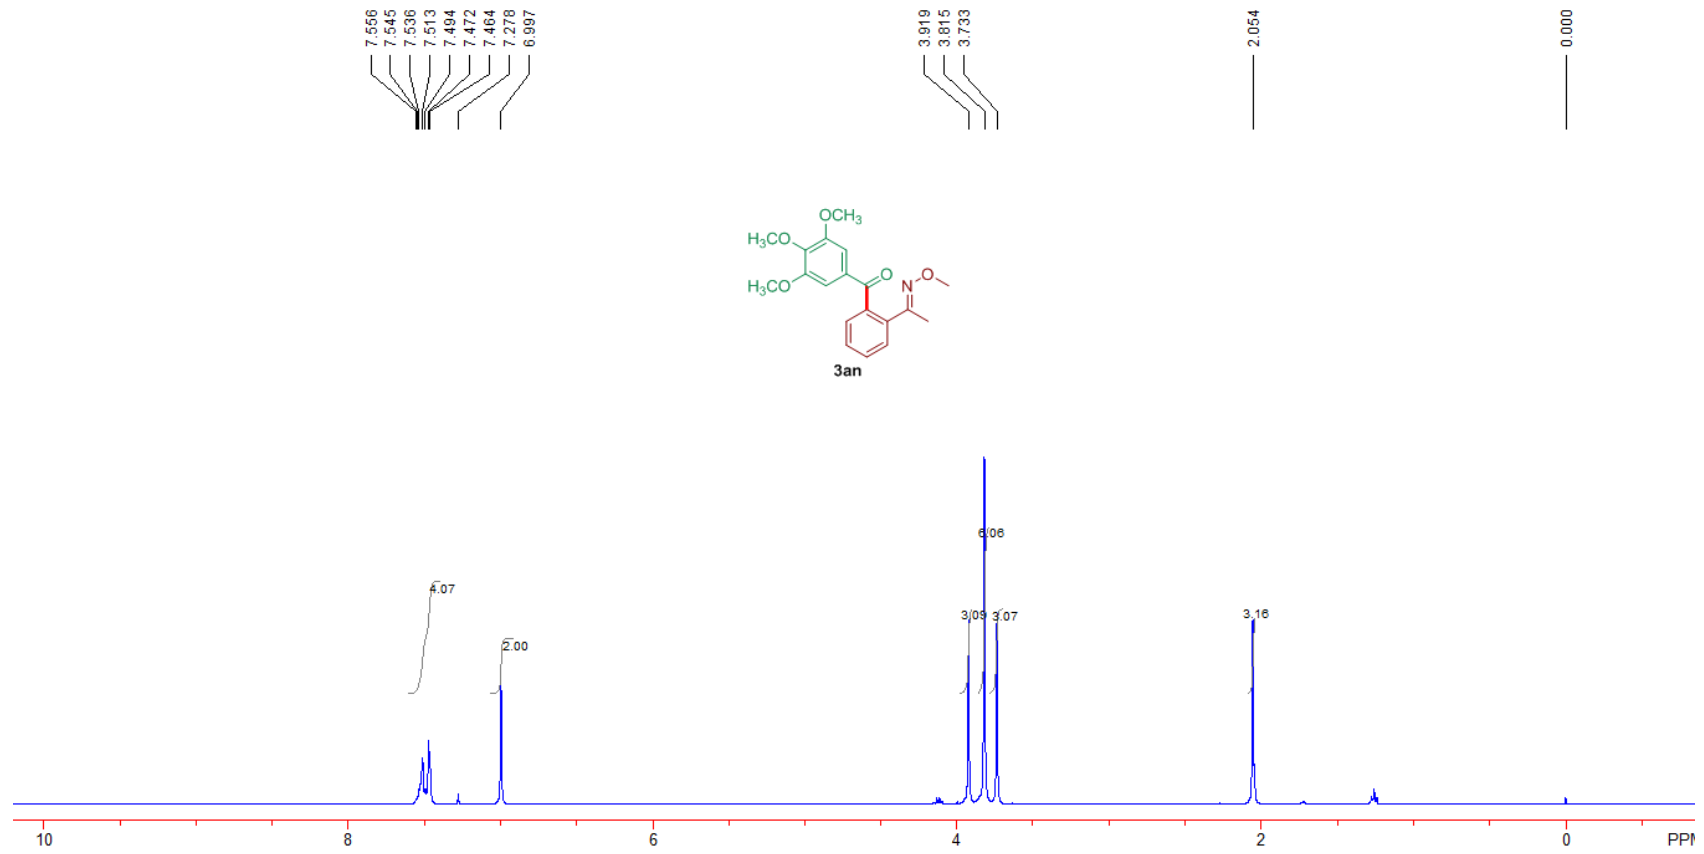

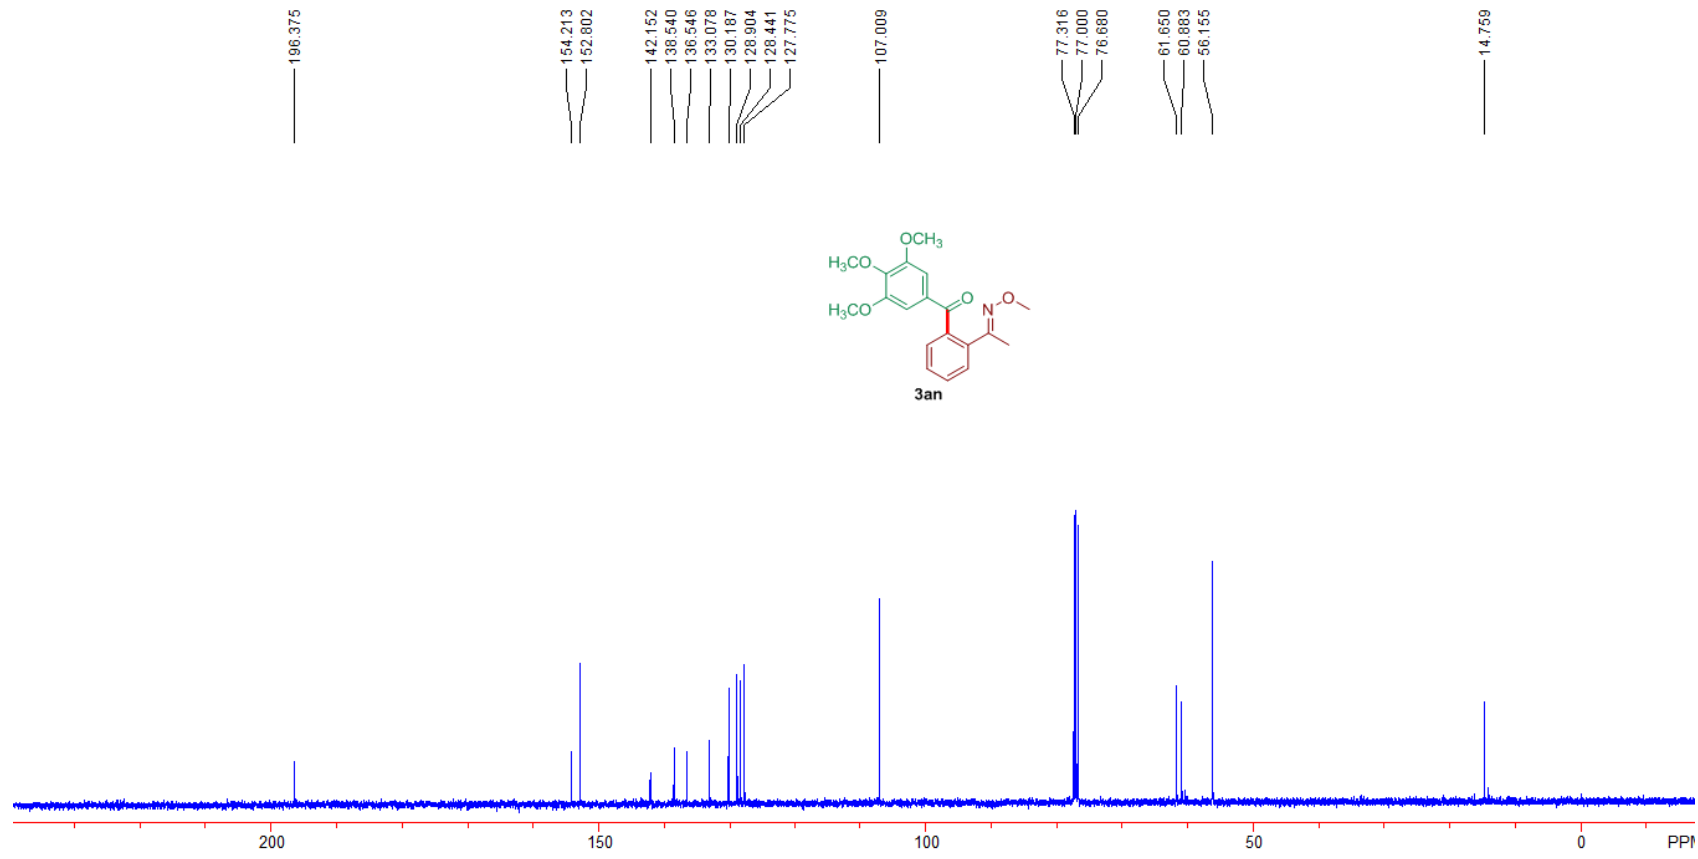

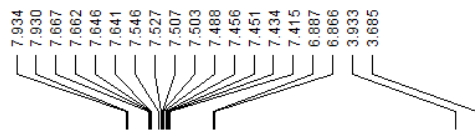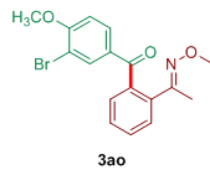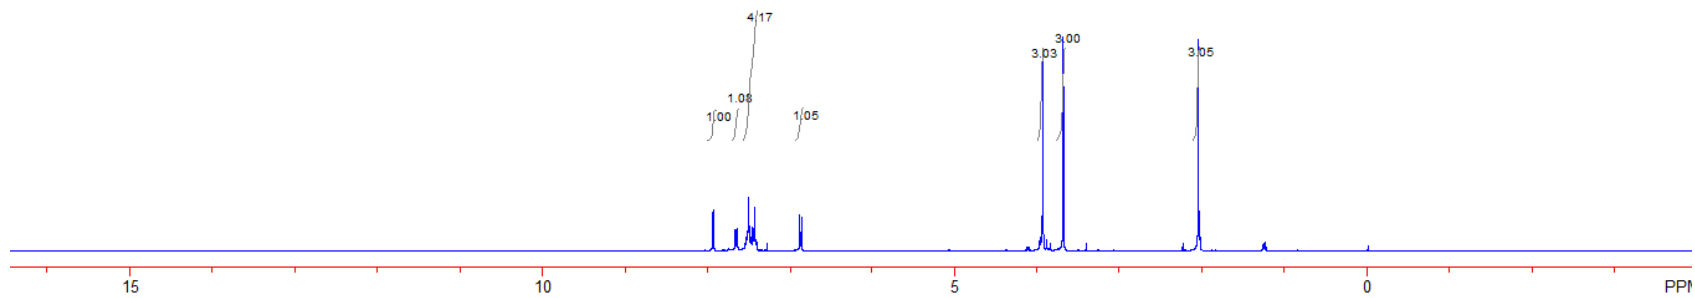

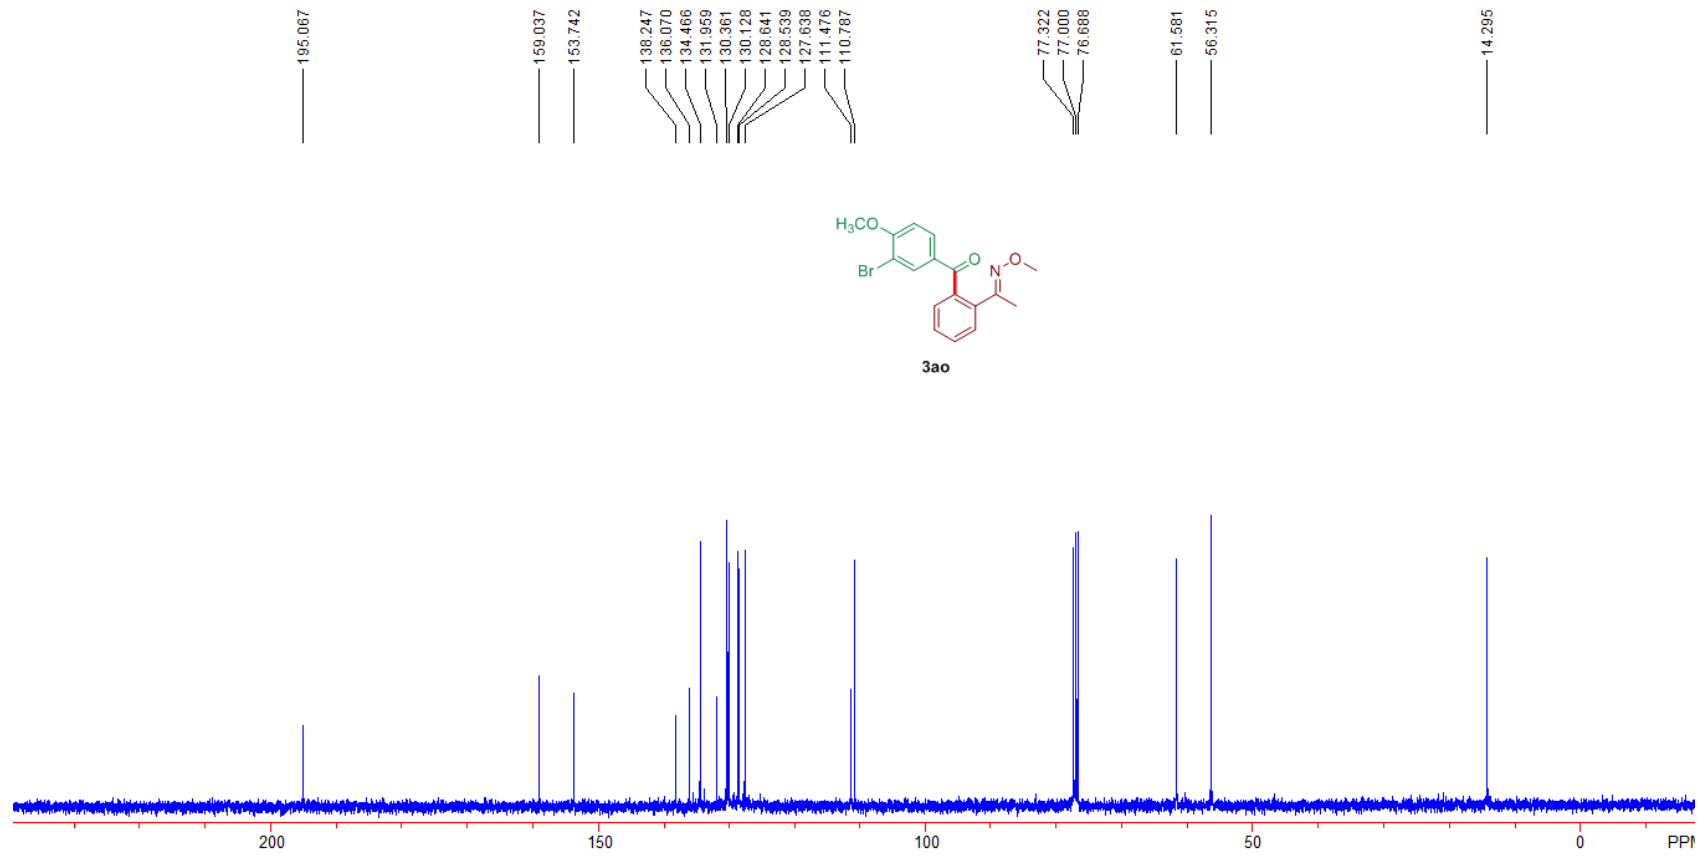

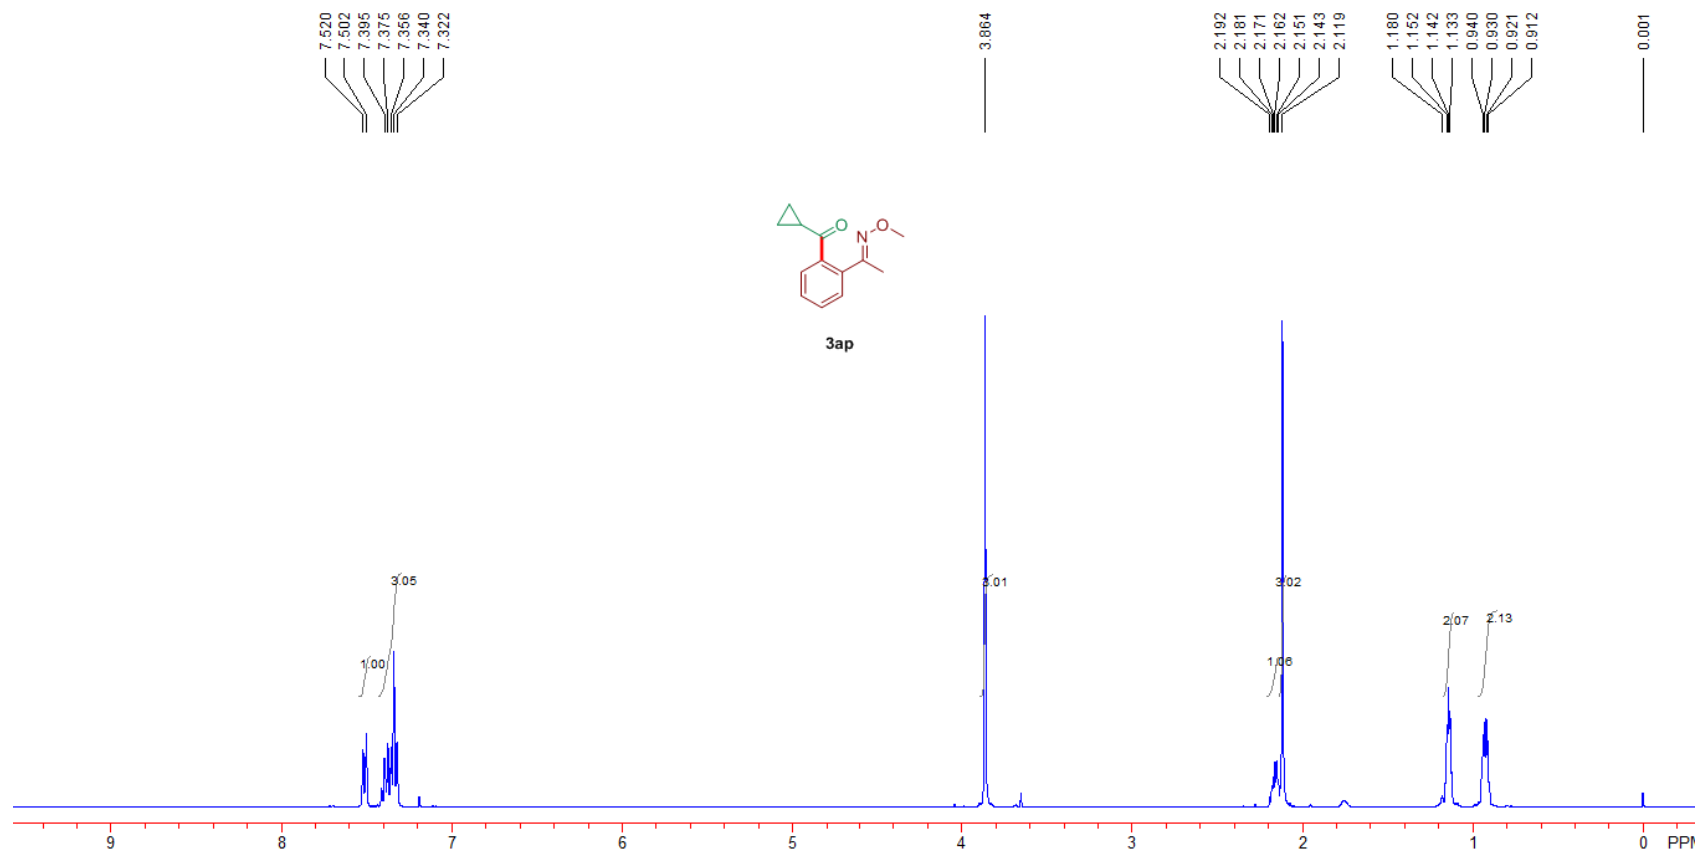



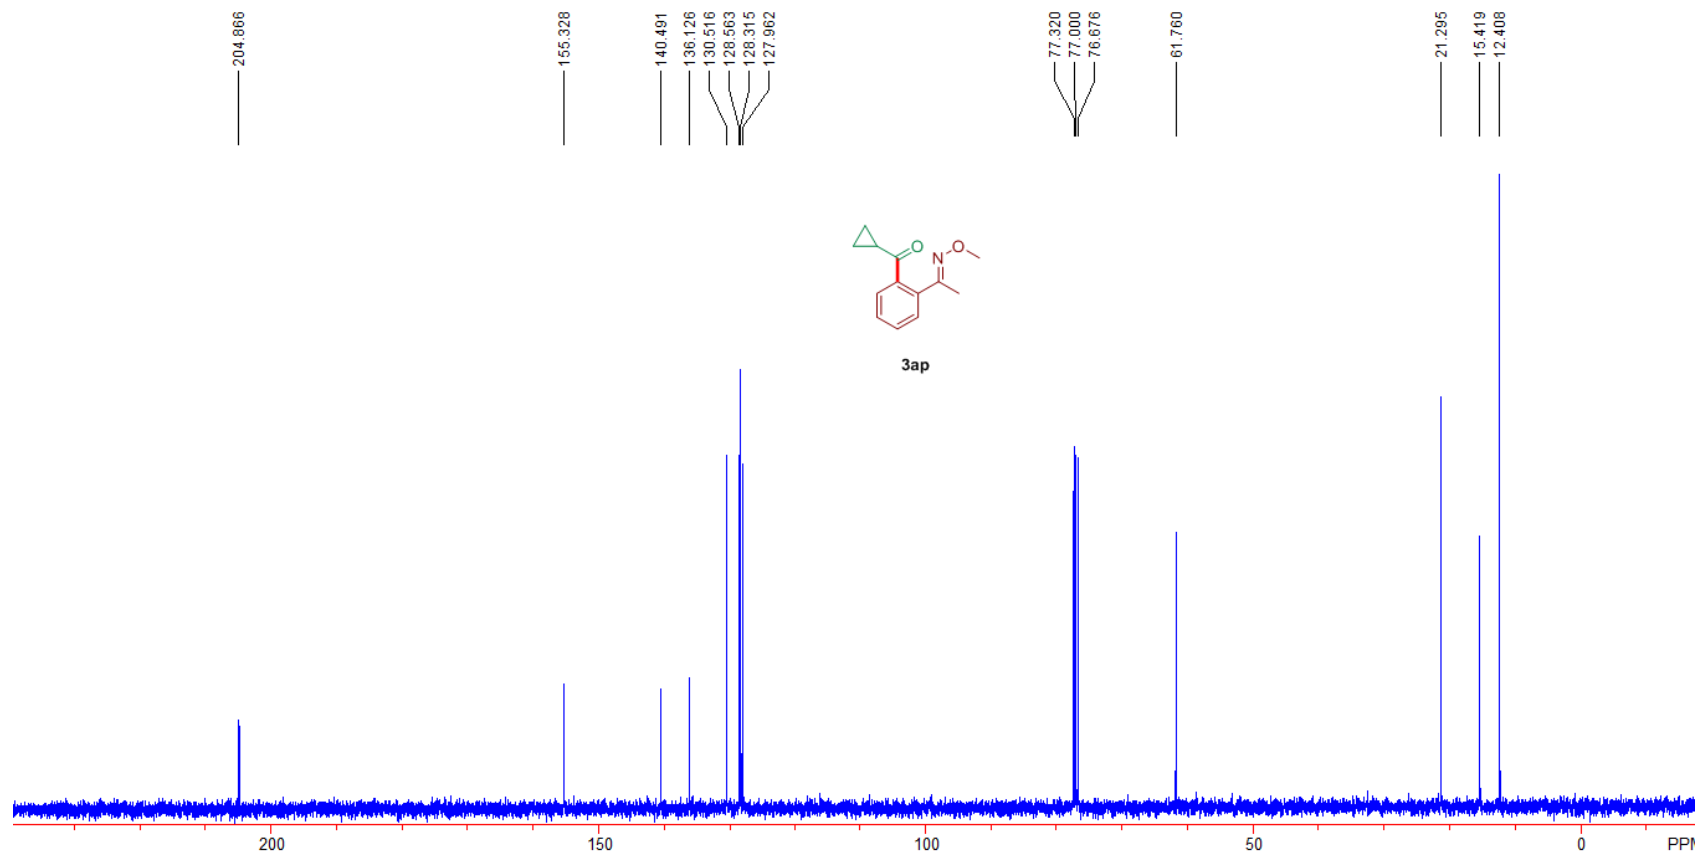

7.394  
7.373  
7.366  
7.334  
7.317

3.851

2.734  
2.706  
2.678

2.125  
1.781  
1.744  
1.707

1.405  
1.376  
1.348  
1.320  
1.234  
1.202  
1.174  
1.150  
1.119

-0.000

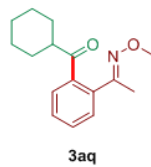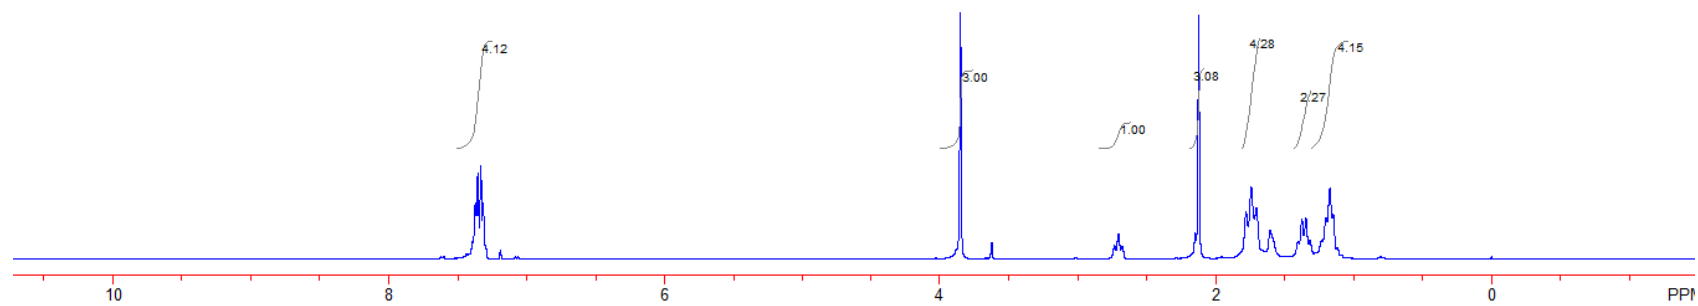

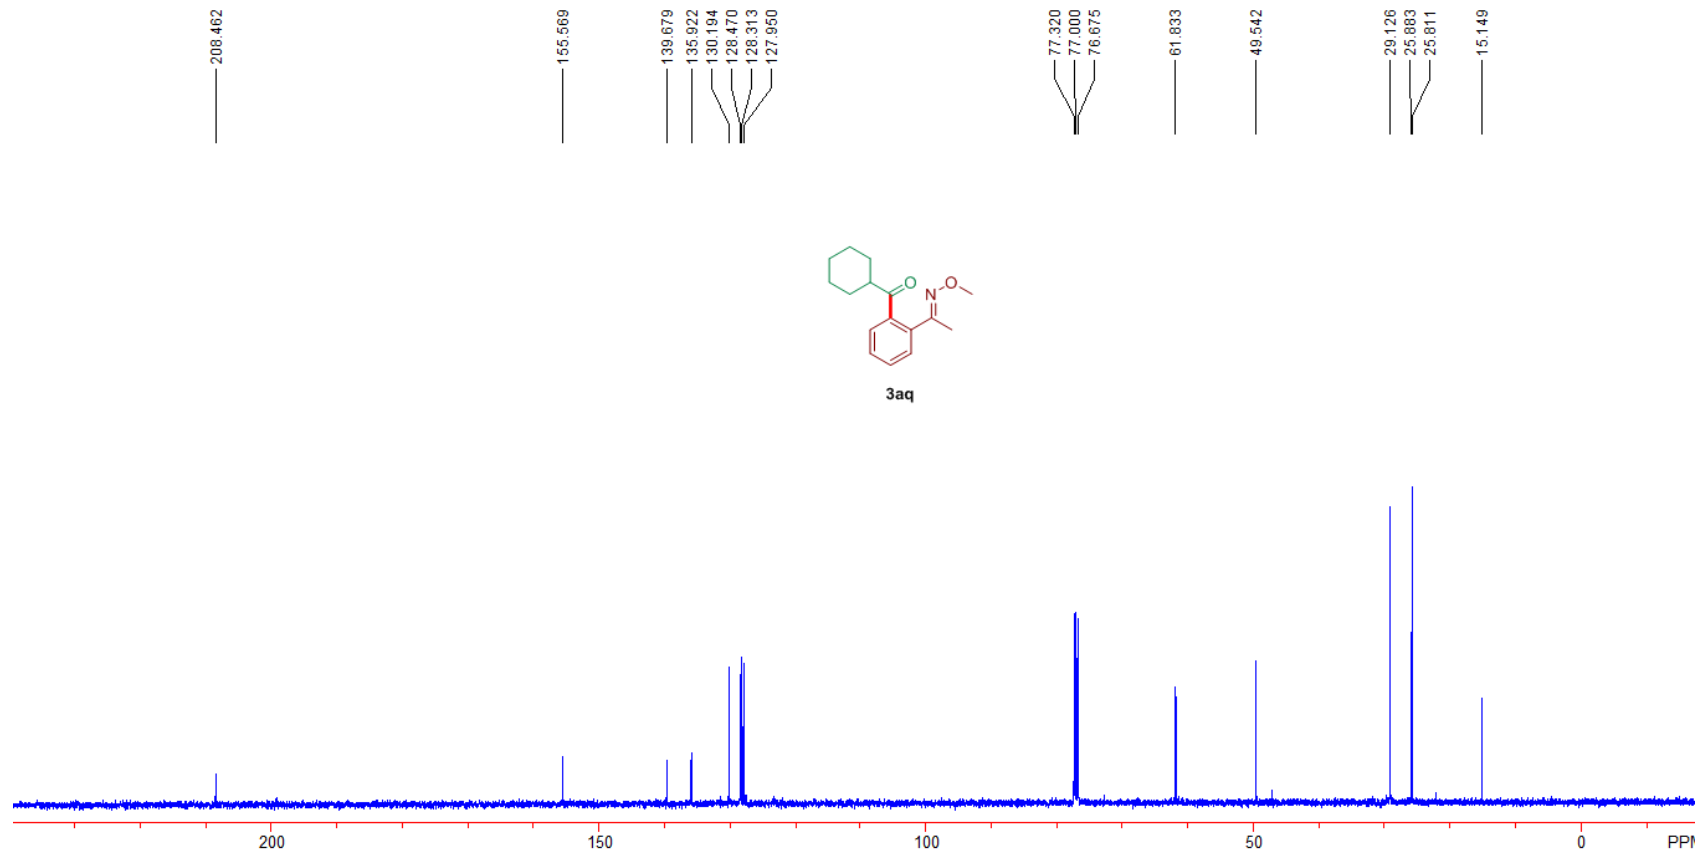

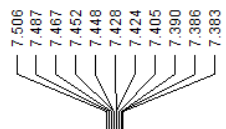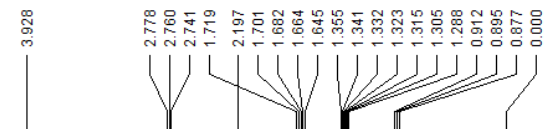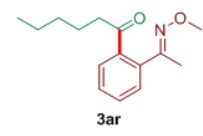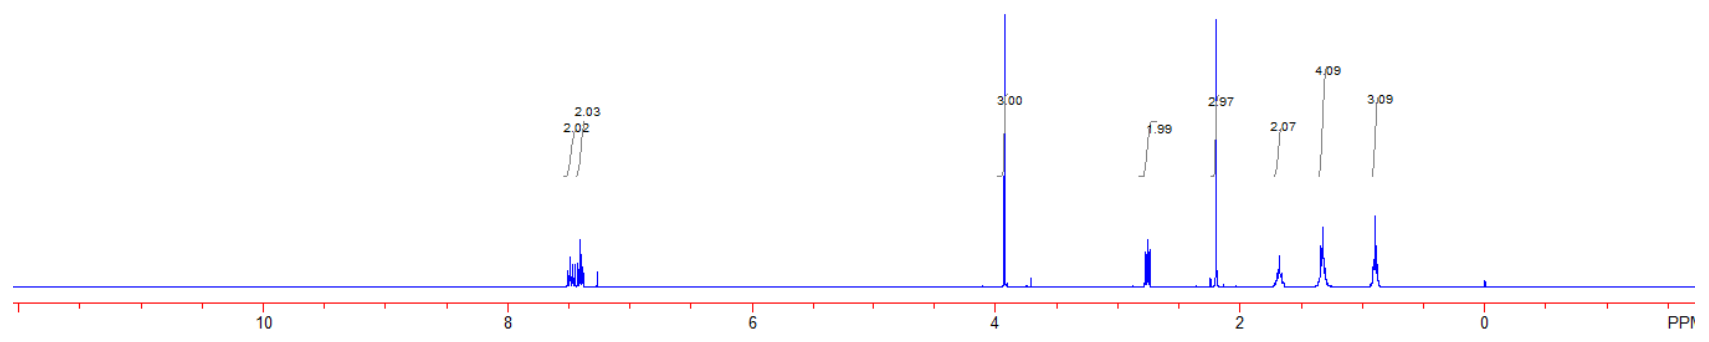

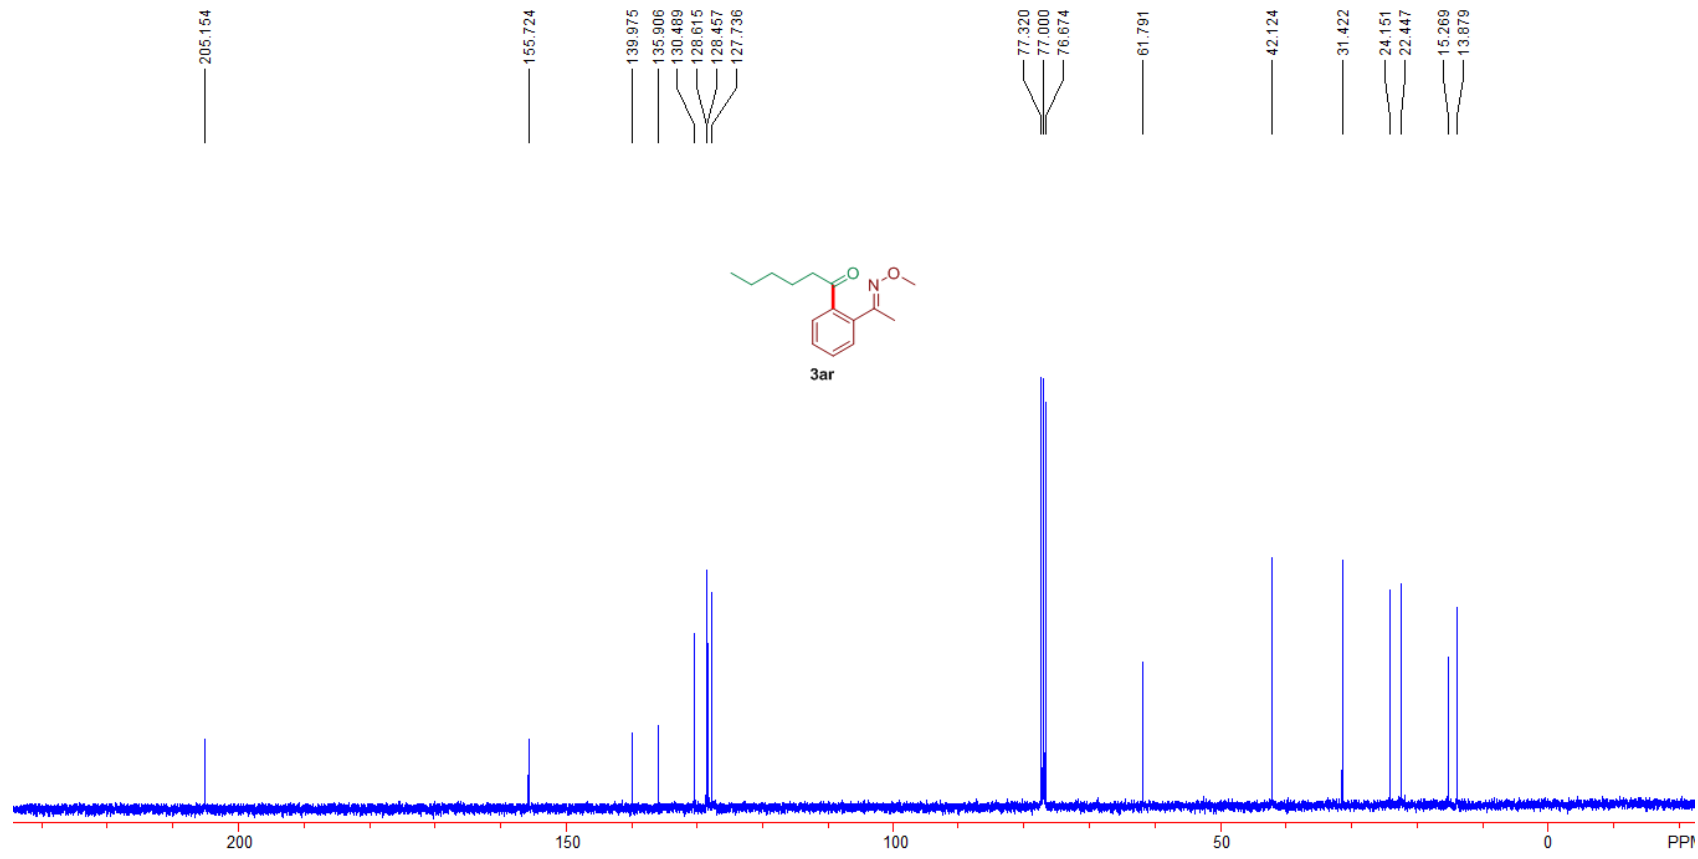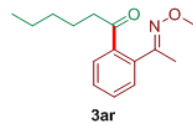

7.541  
7.522  
7.490  
7.472  
7.453  
7.425  
7.406  
7.388  
7.369

3.927

2.687

2.670

2.254

2.238

2.221

2.211

2.198

2.188

2.170

2.153

0.976

0.959

-0.000

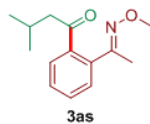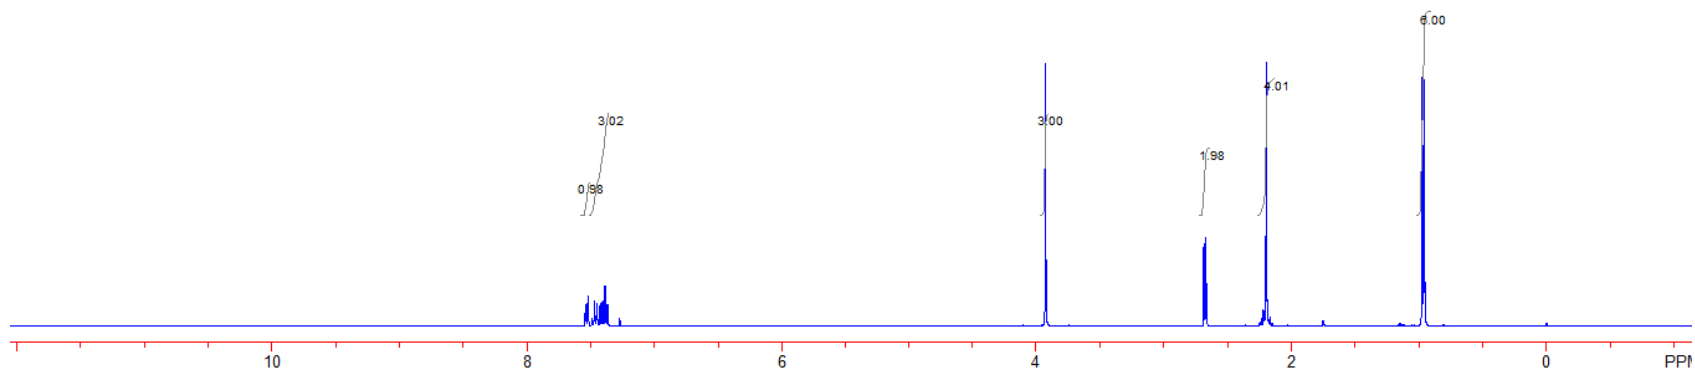

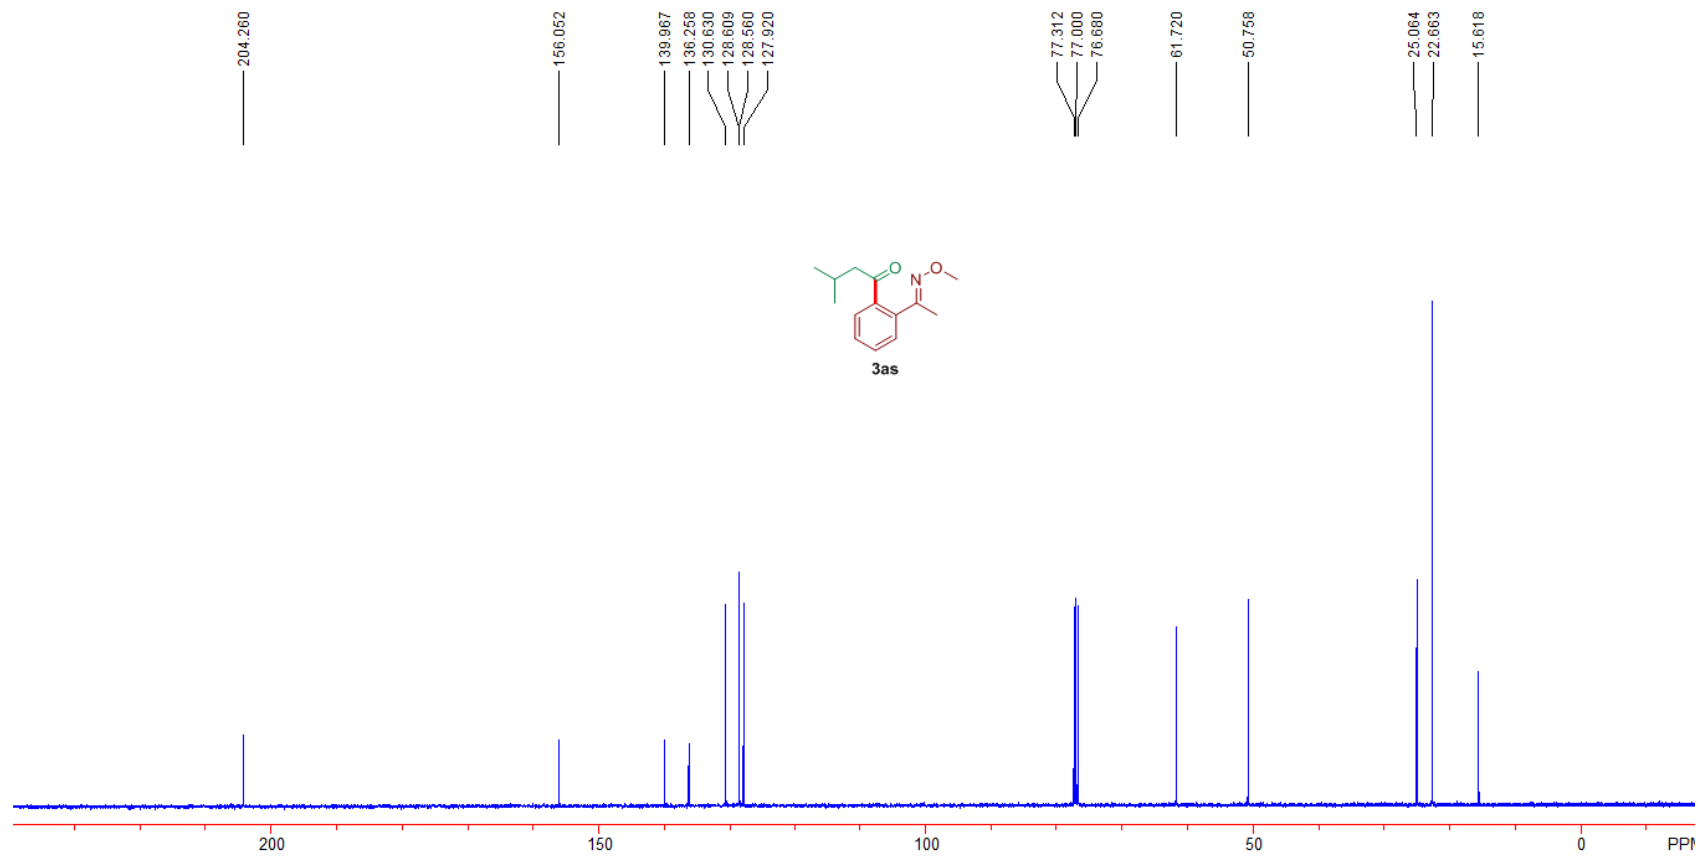

7.493  
7.473  
7.469  
7.454  
7.452  
7.436  
7.430  
7.414  
7.391  
6.680  
6.662  
6.645  
6.623  
6.606  
6.382  
6.340

3.908

2.228  
2.211  
2.193  
2.175  
2.136  
1.527  
1.508  
1.490  
1.471  
1.453  
0.951  
0.932  
0.914

-0.000

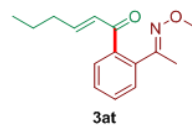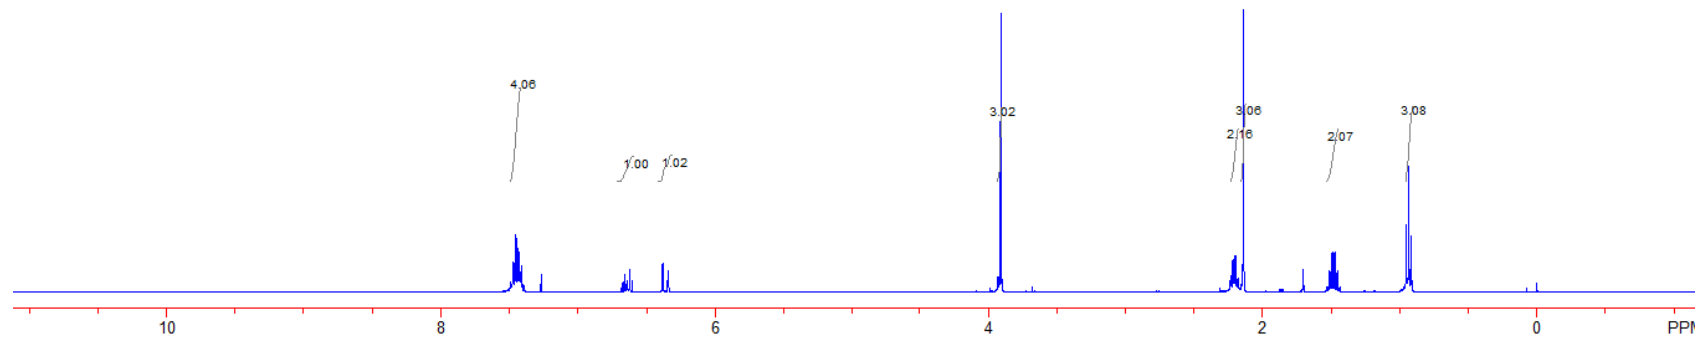



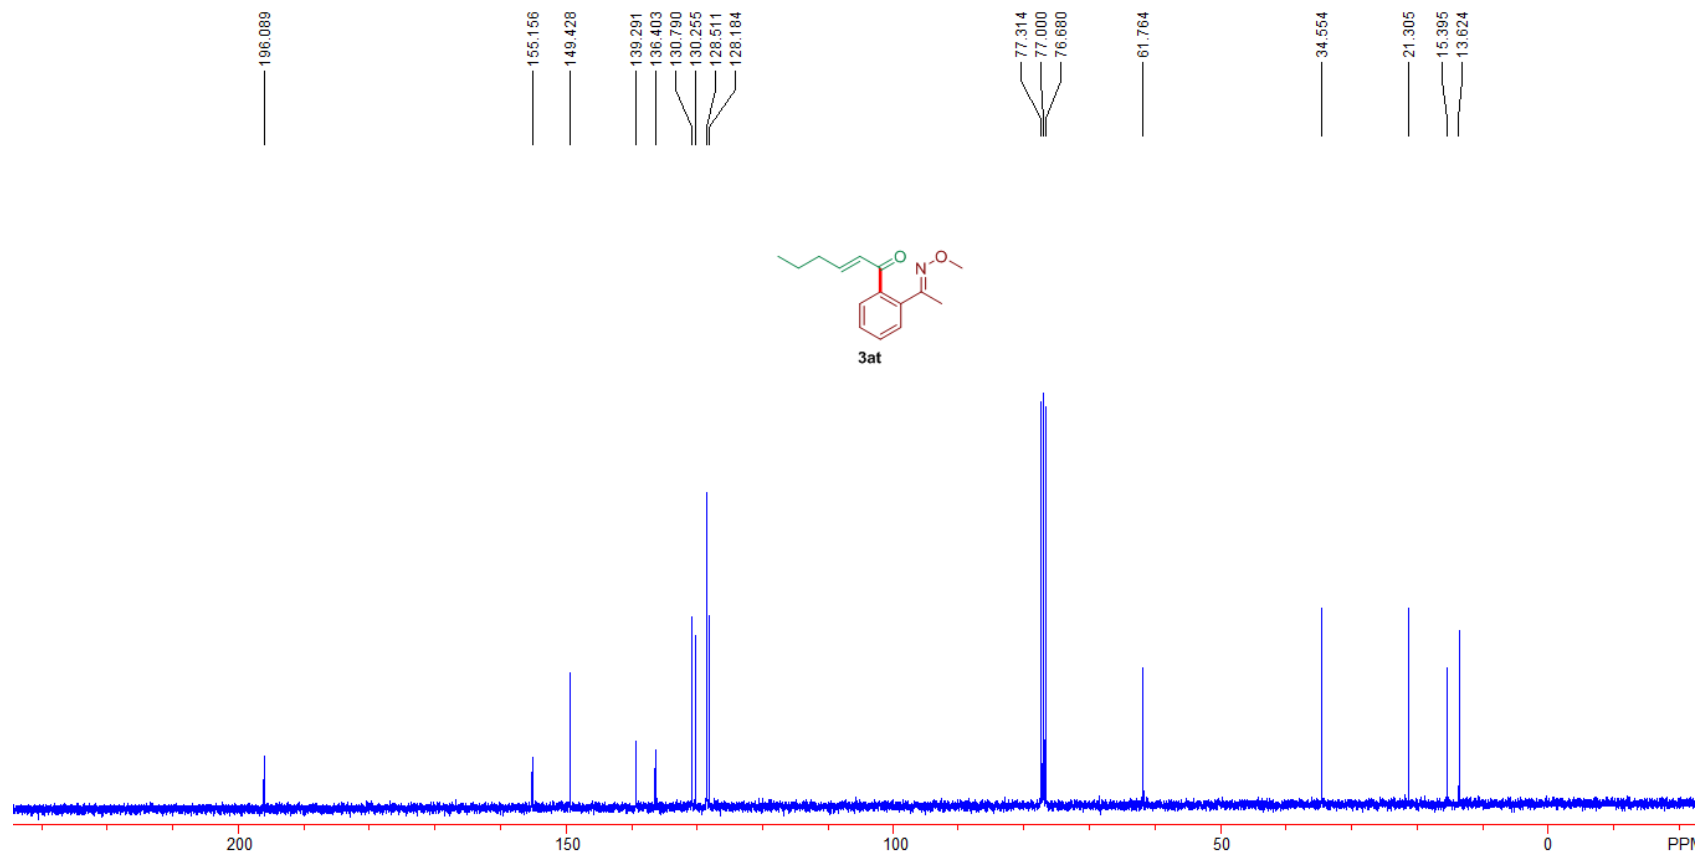

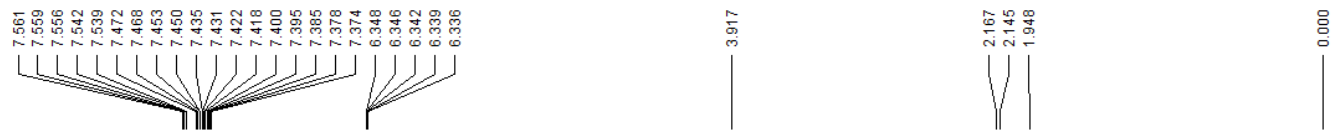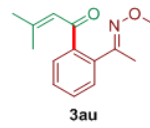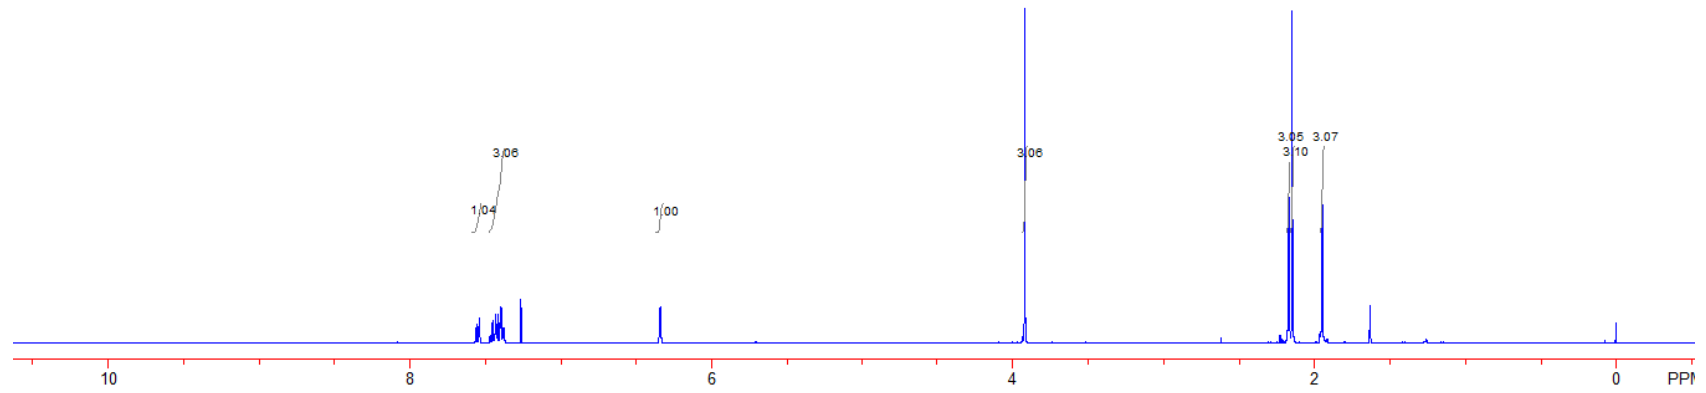

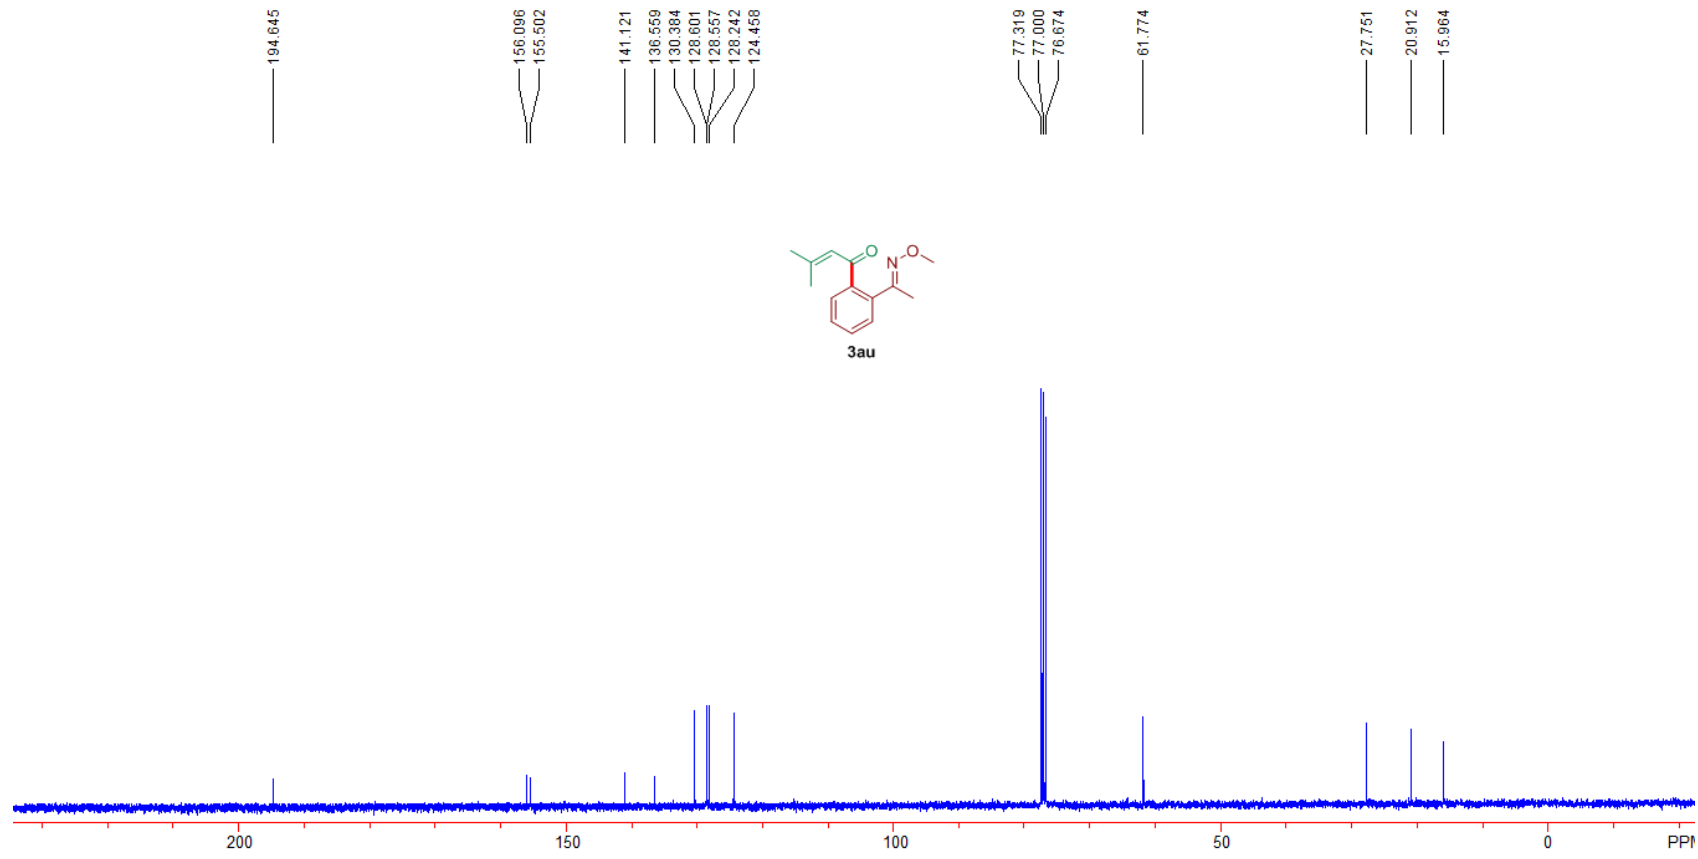

7.583  
7.561  
7.547  
7.530  
7.525  
7.518  
7.515  
7.472  
7.447  
7.428

3.689

2.062

0.000

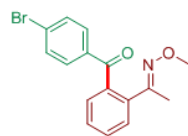

5ac

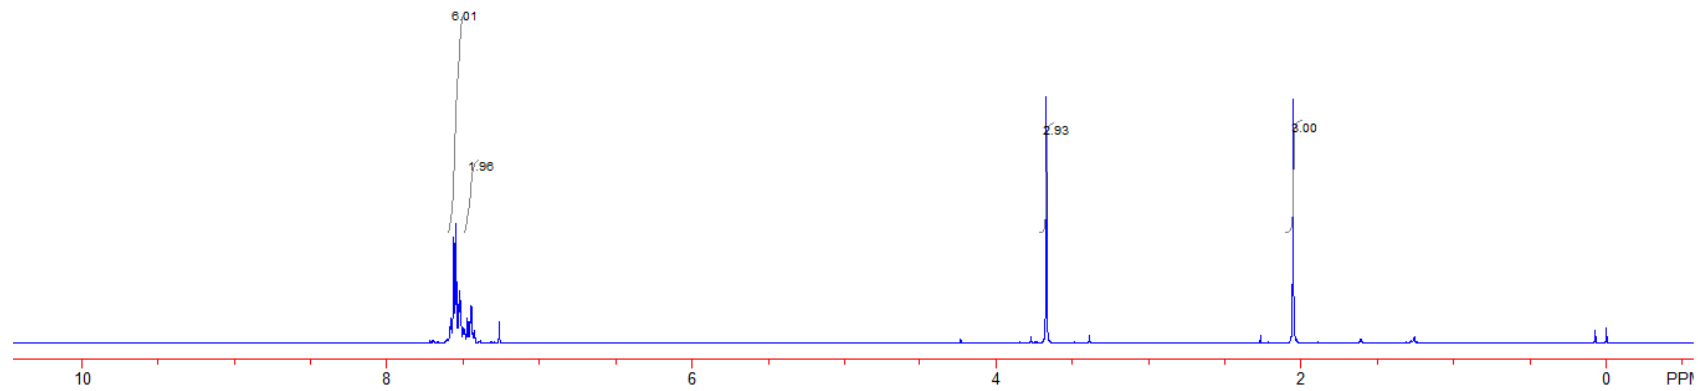

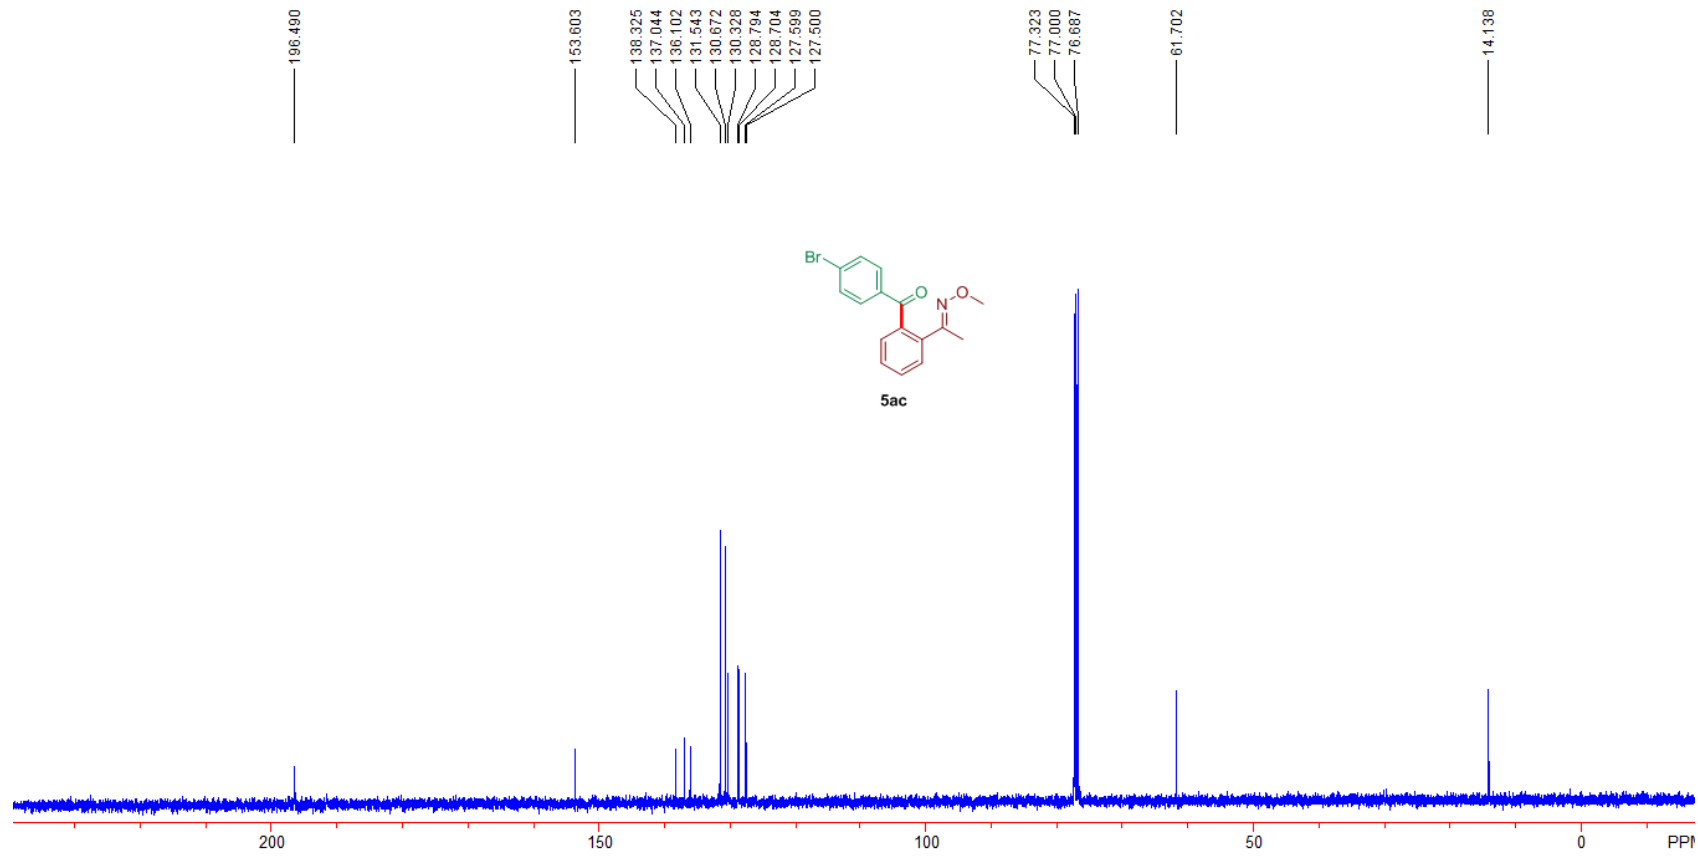

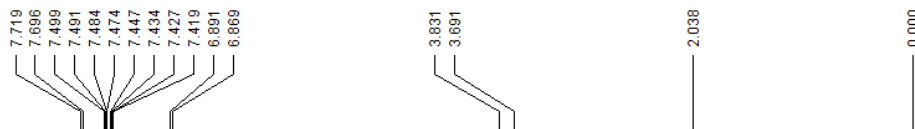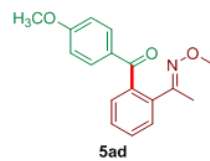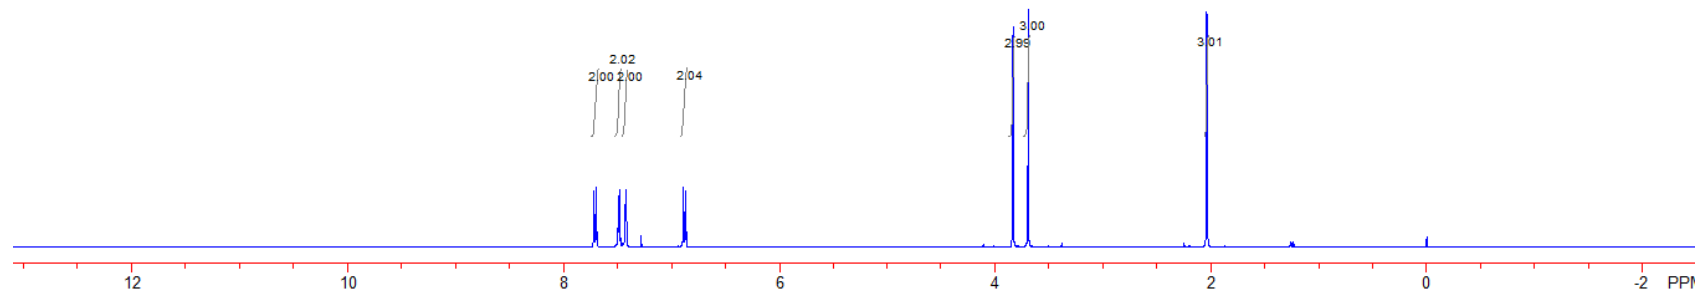

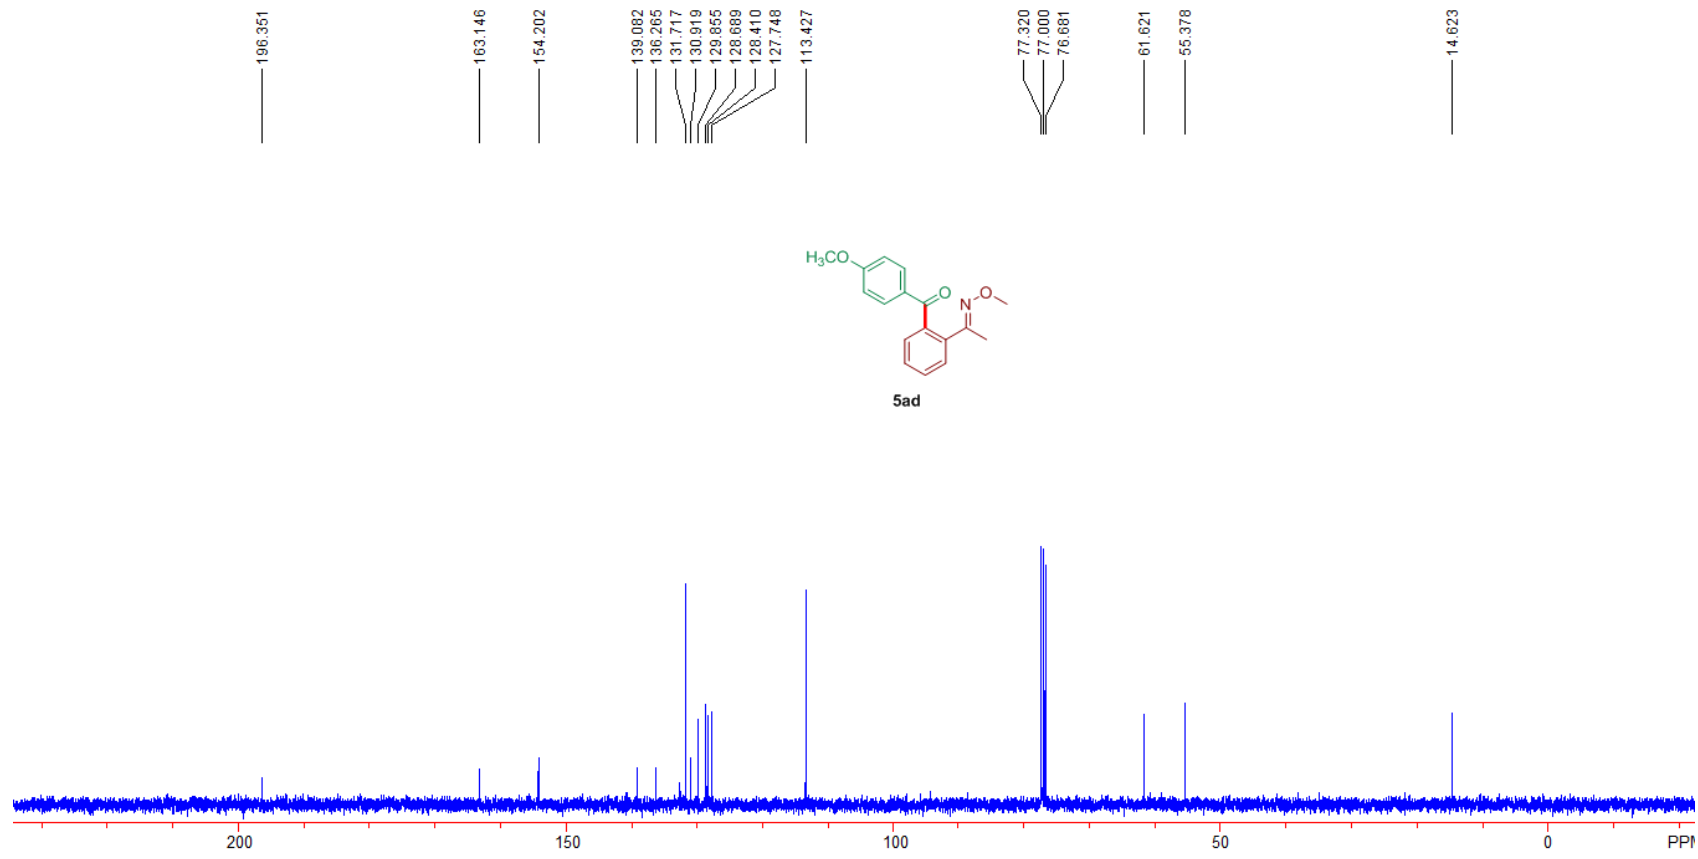

8.459  
8.452  
8.018  
7.997  
7.978  
7.837  
7.815  
7.757  
7.749  
7.739  
7.731  
7.711  
7.669  
7.647  
7.610  
7.592  
7.384  
7.366  
7.348  
7.279  
7.260  
7.242  
7.234  
7.223

-0.000

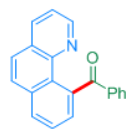

7aa

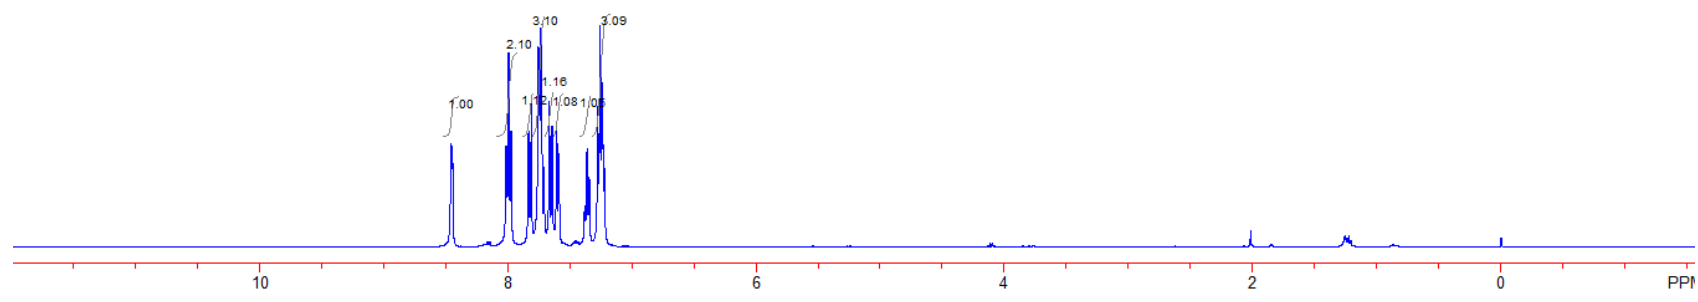



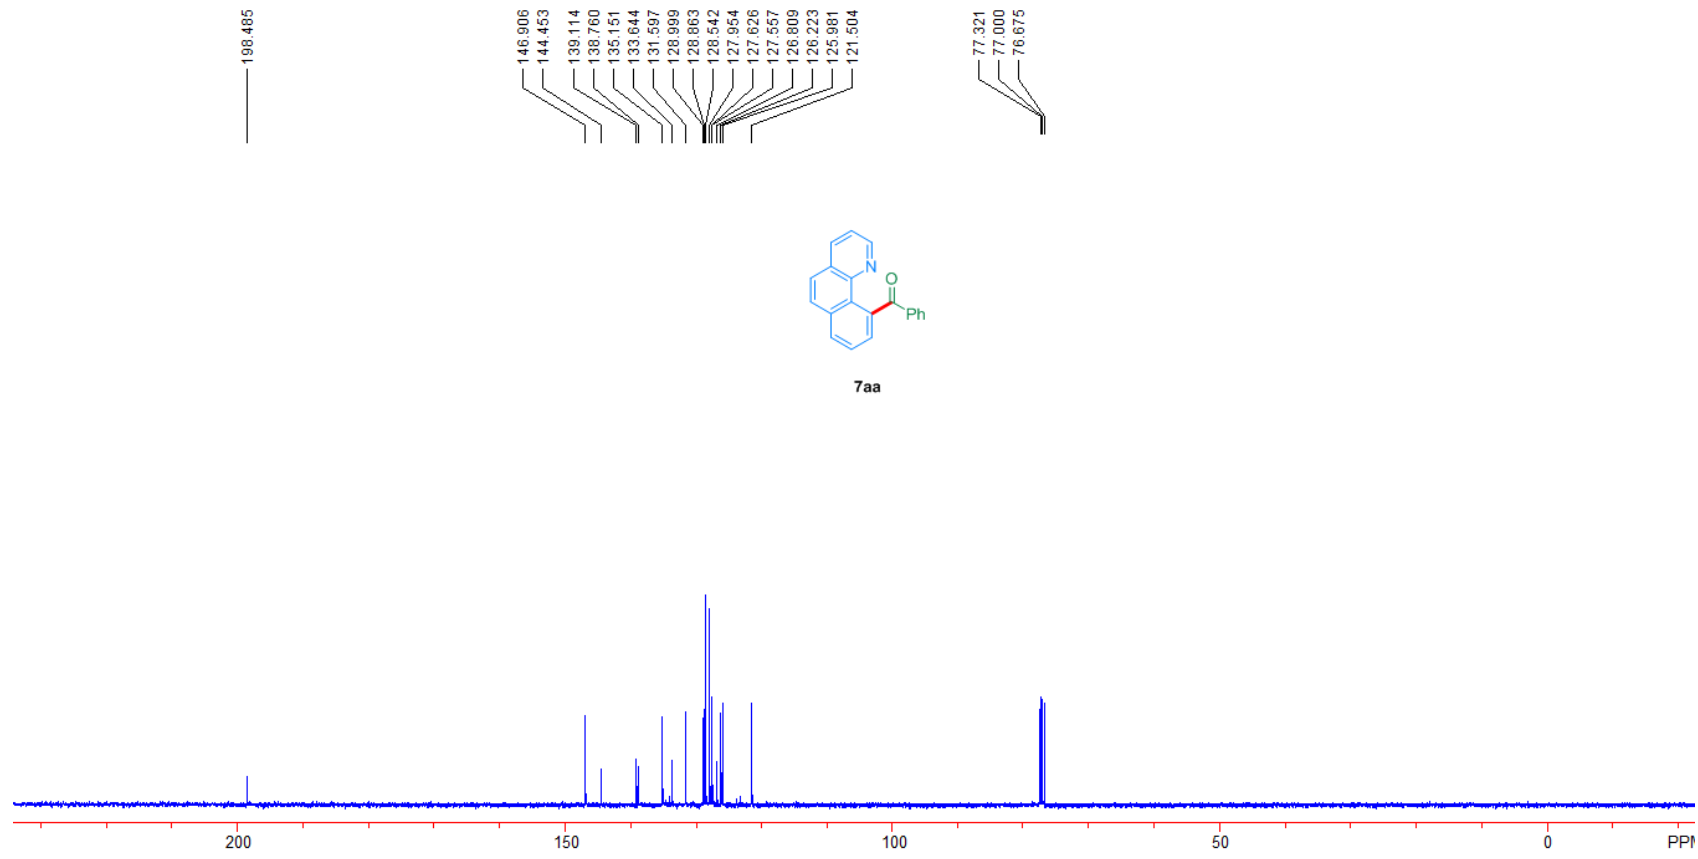

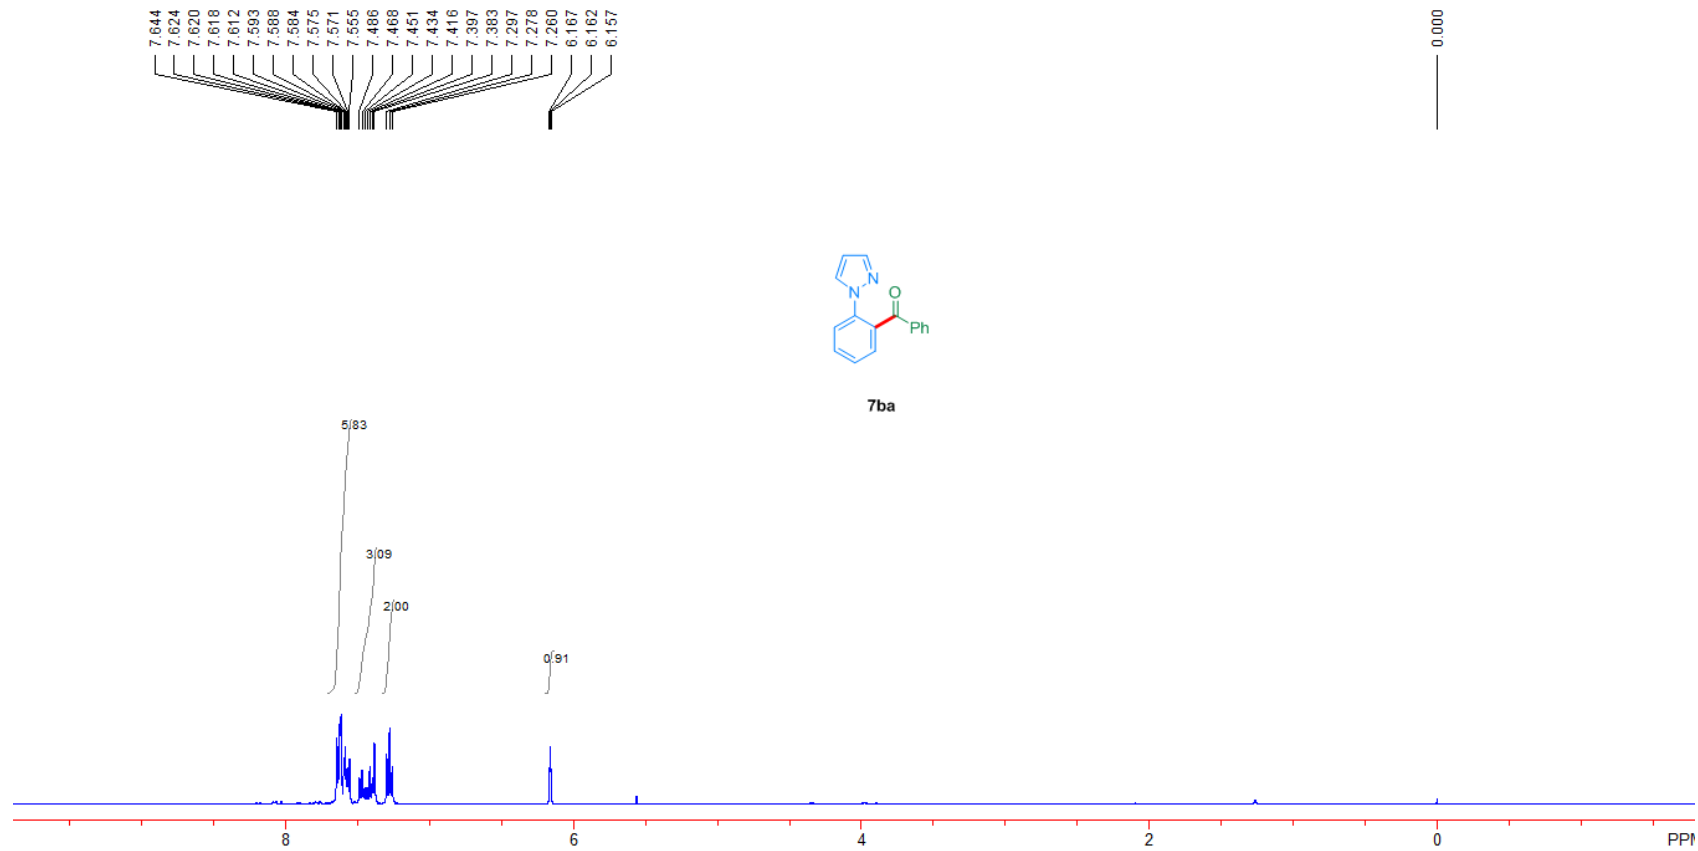

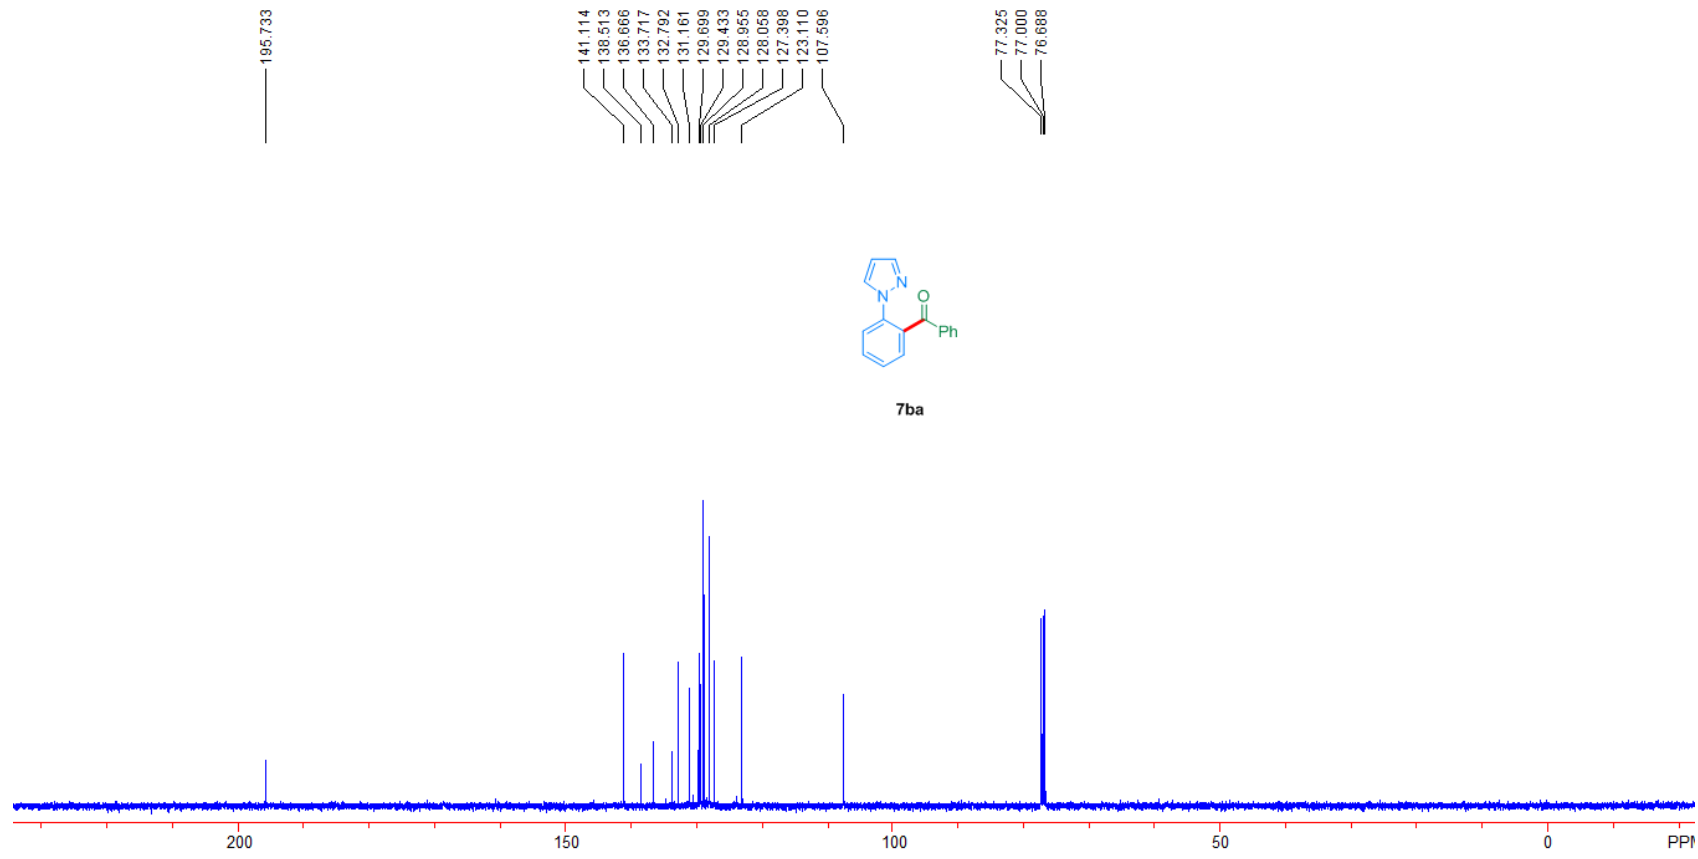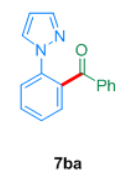

8.353  
8.341  
7.768  
7.749  
7.691  
7.669  
7.609  
7.587  
7.568  
7.541  
7.522  
7.500  
7.488  
7.468  
7.383  
7.365  
7.346  
7.267  
7.248  
7.229  
7.001  
6.986  
6.971

0.000

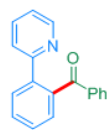

7ca

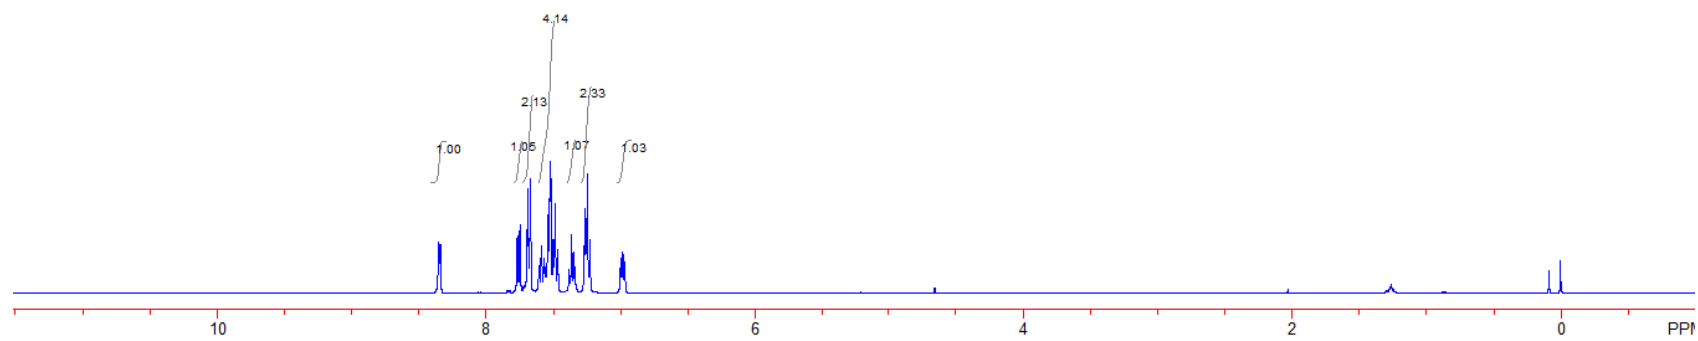

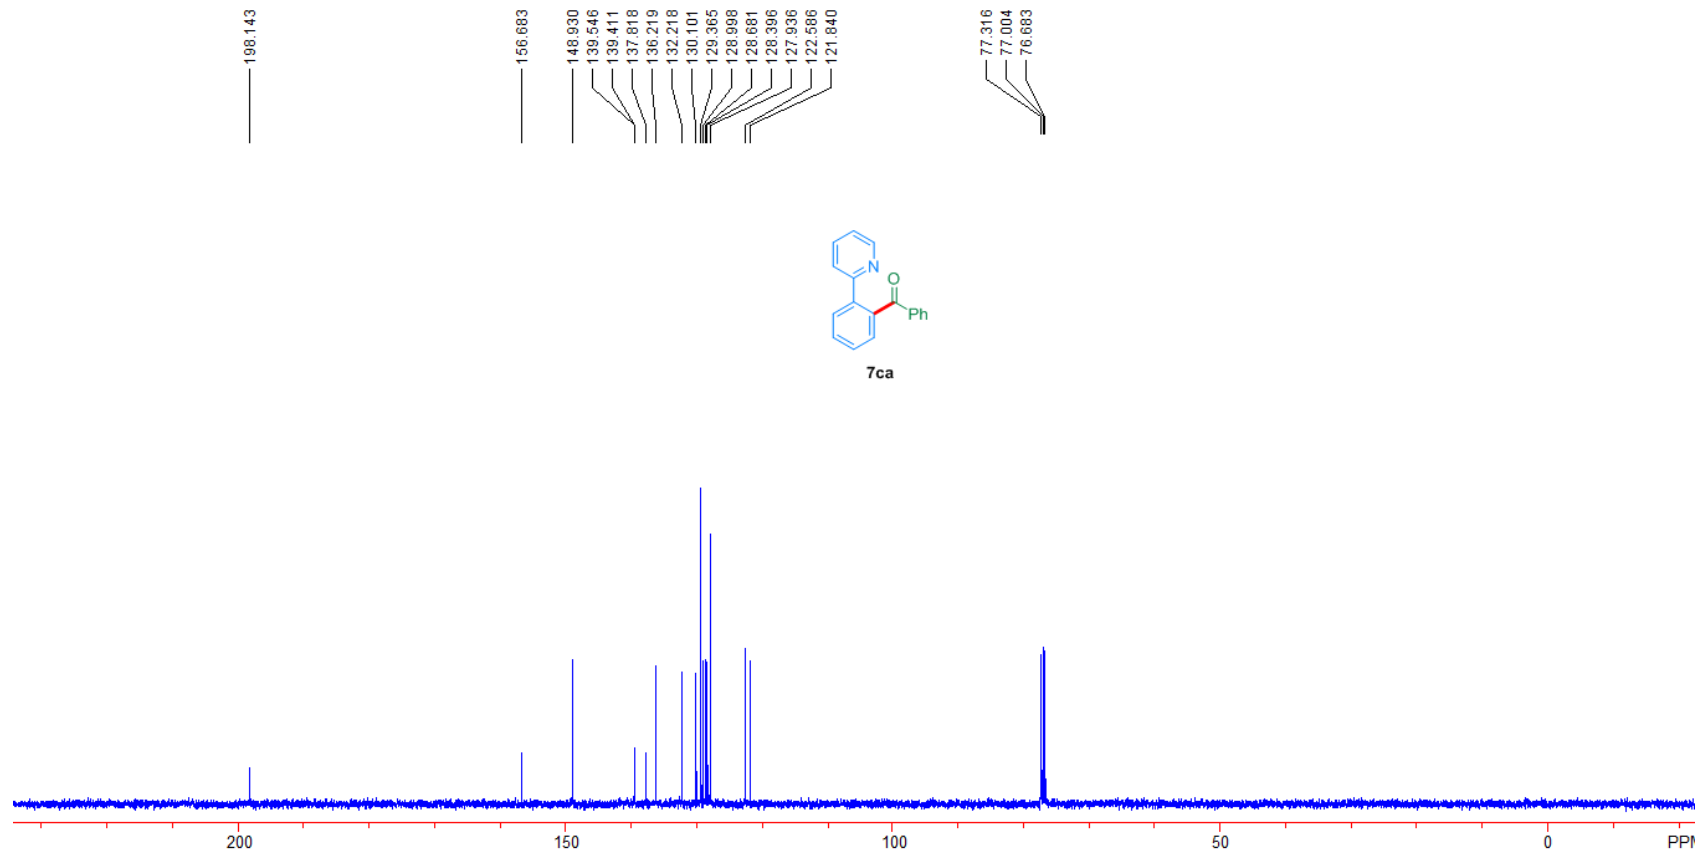

8.005  
7.992  
7.759  
7.741  
7.584  
7.580  
7.561  
7.543  
7.516  
7.511  
7.484  
7.478  
7.461  
7.443  
7.339  
7.320  
7.305  
7.301  
7.288  
7.274  
7.254  
6.872  
6.859  
6.854  
6.842  
6.602  
6.581

0.000

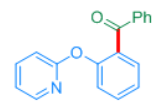

7da

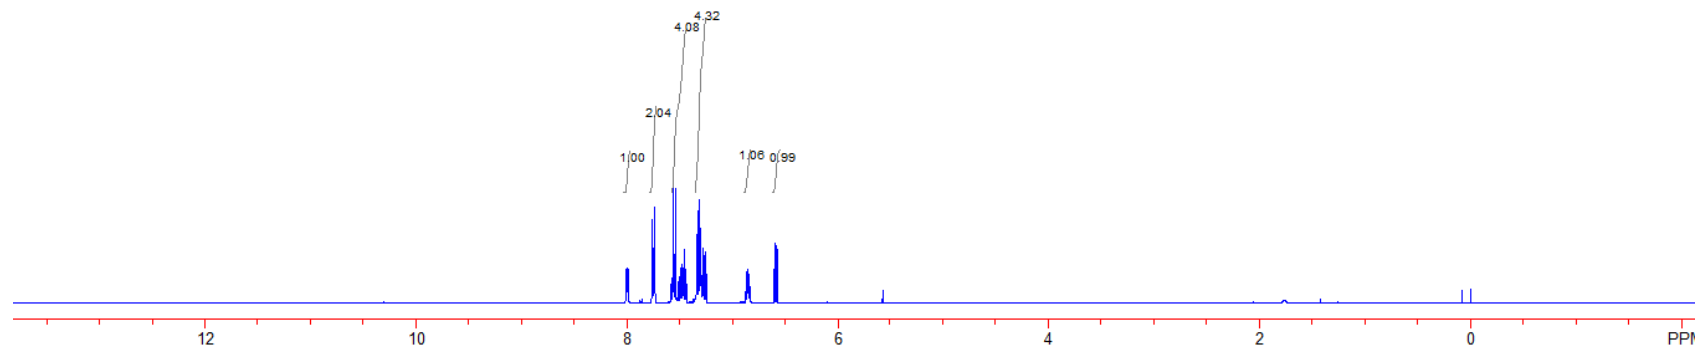

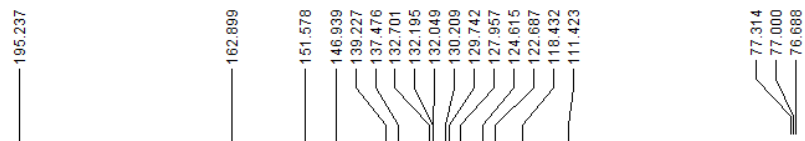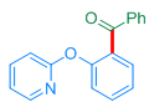

7da

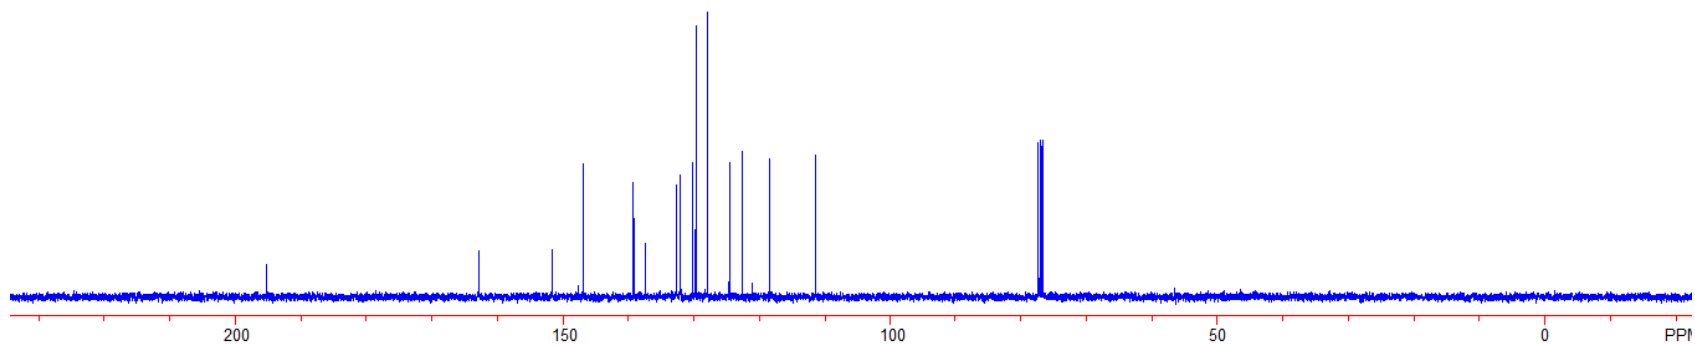

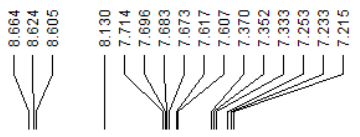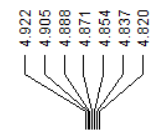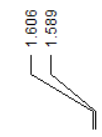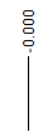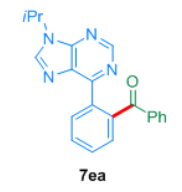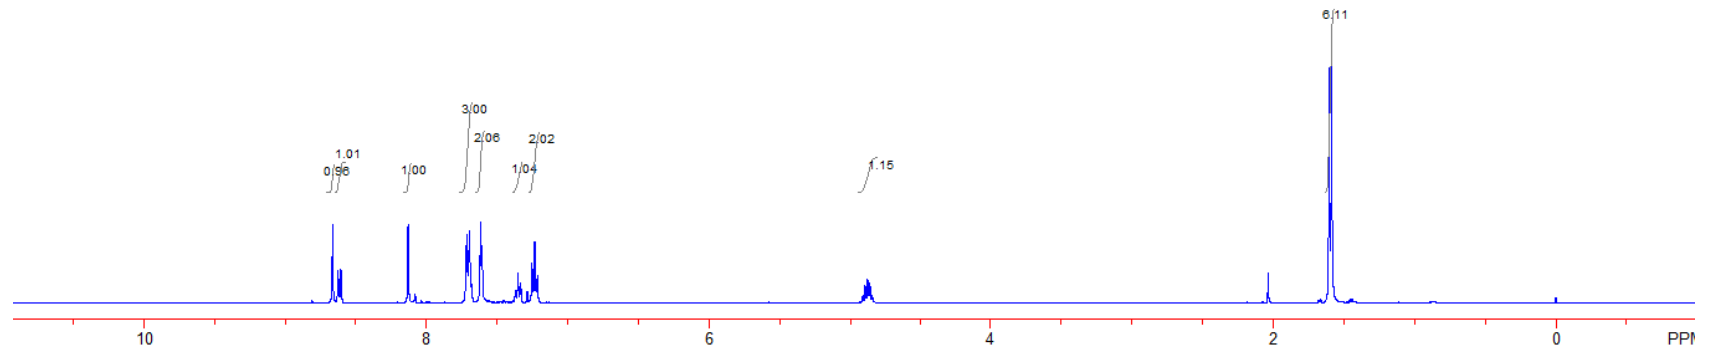



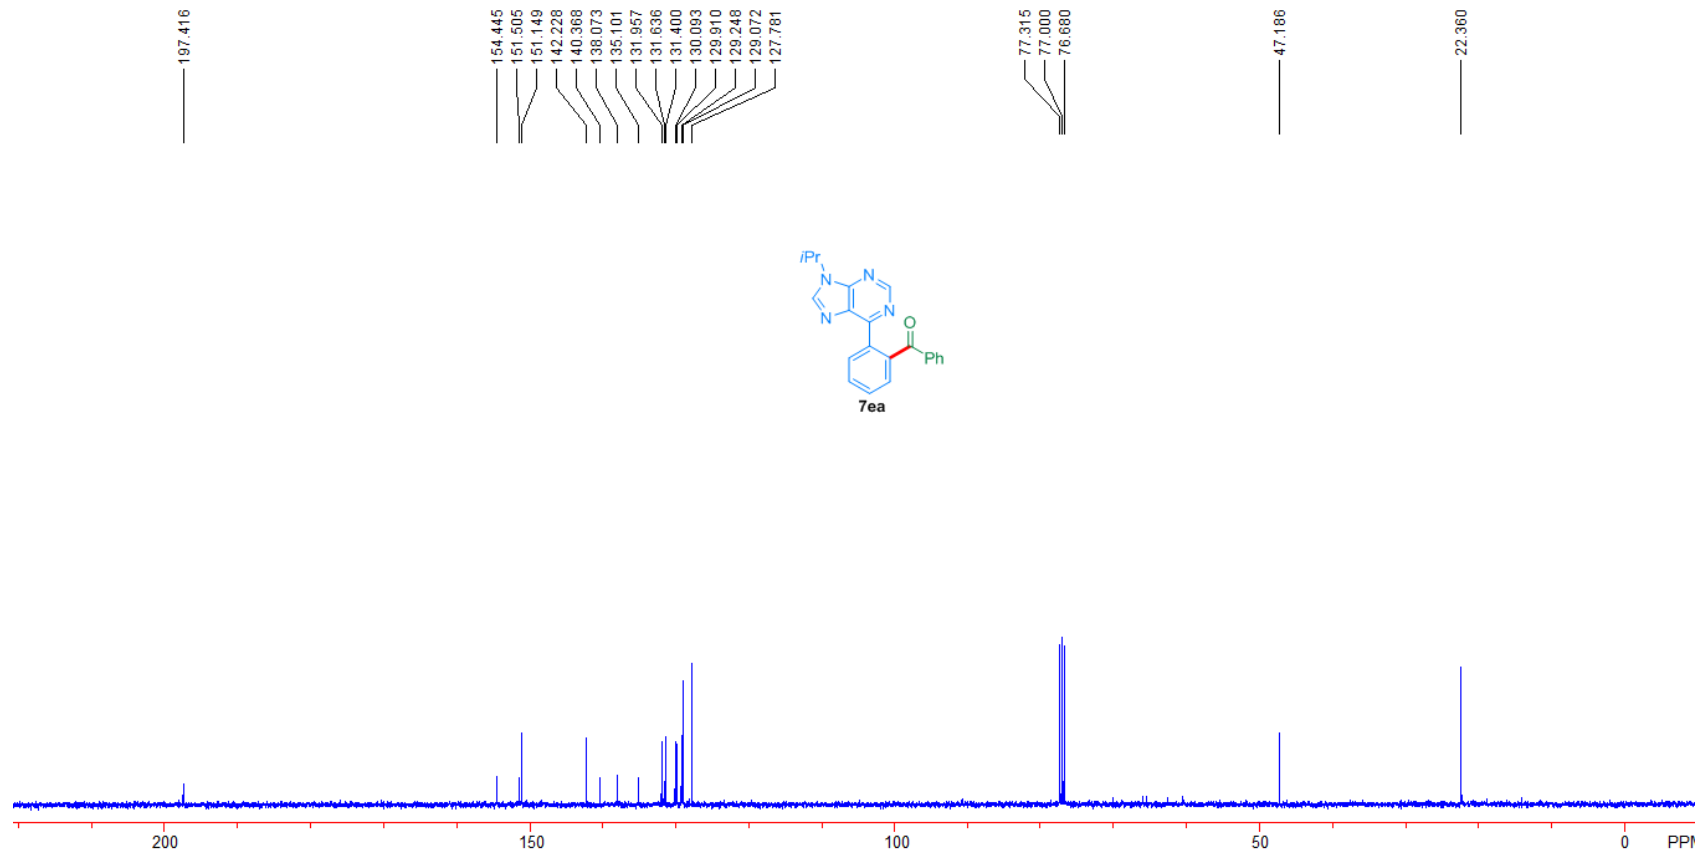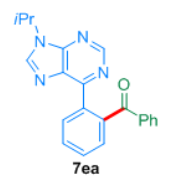

7.954  
7.934  
7.914  
7.894  
7.874  
7.854  
7.834  
7.814  
7.794  
7.774  
7.754  
7.734  
7.714  
7.694  
7.674  
7.654  
7.634  
7.614  
7.594  
7.574  
7.554  
7.534  
7.514  
7.494  
7.474  
7.454  
7.434  
7.414  
7.394  
7.374  
7.354  
7.334  
7.314  
7.296

0.000

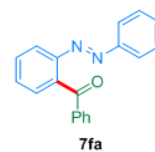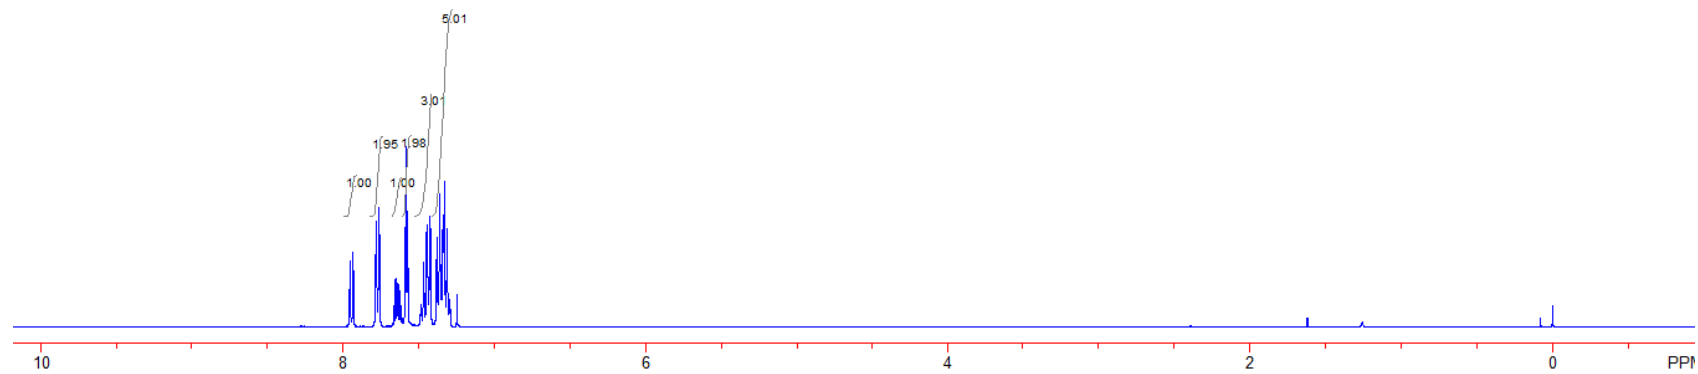

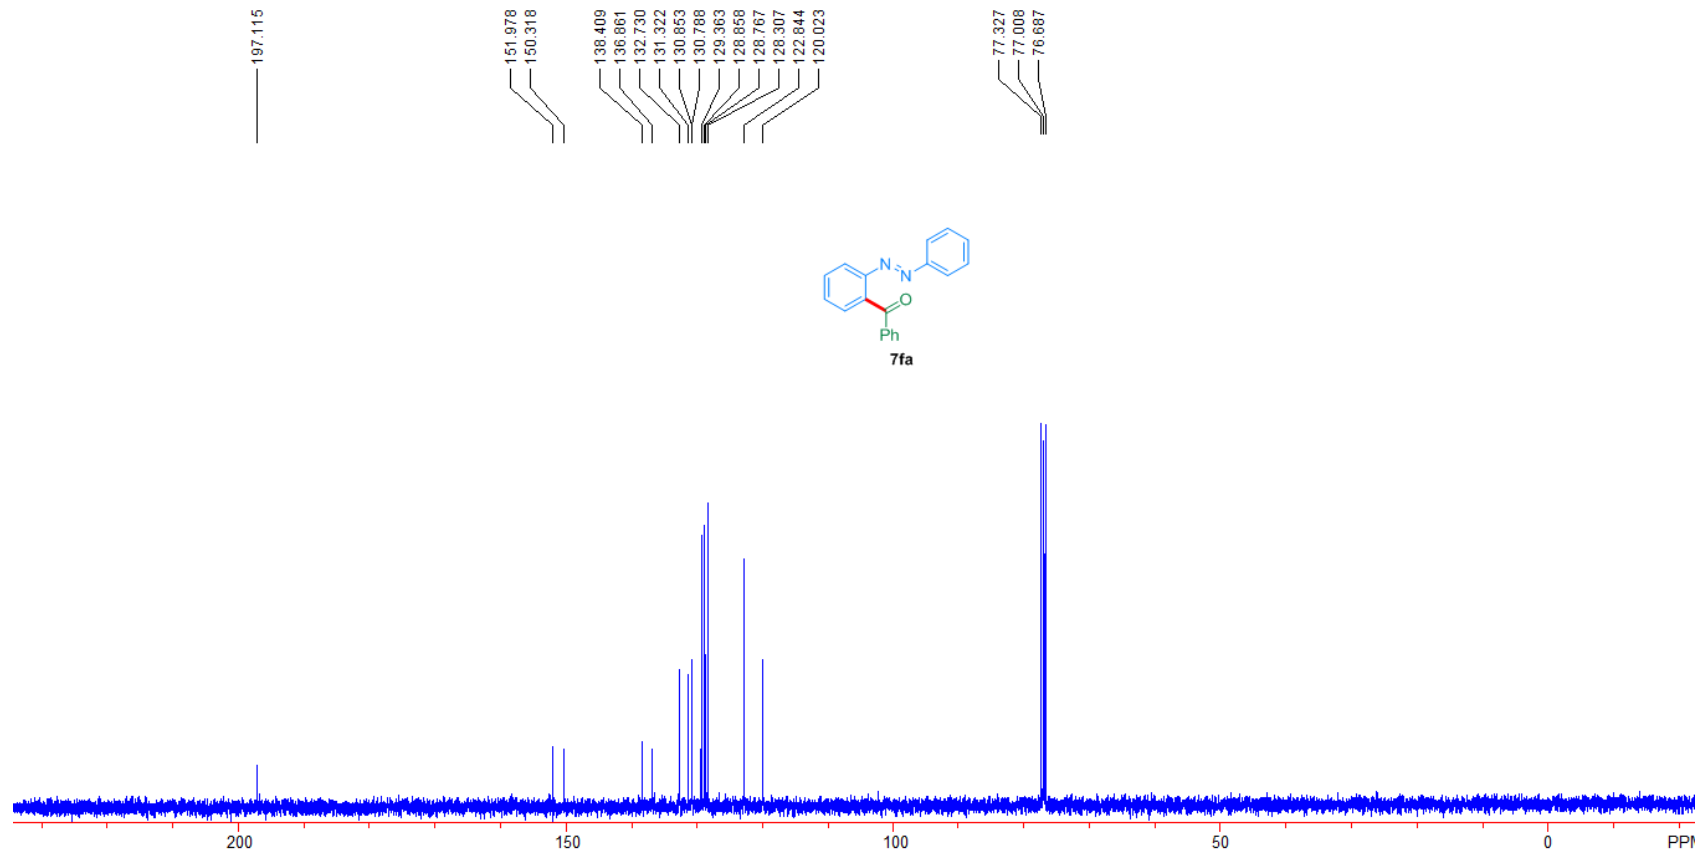

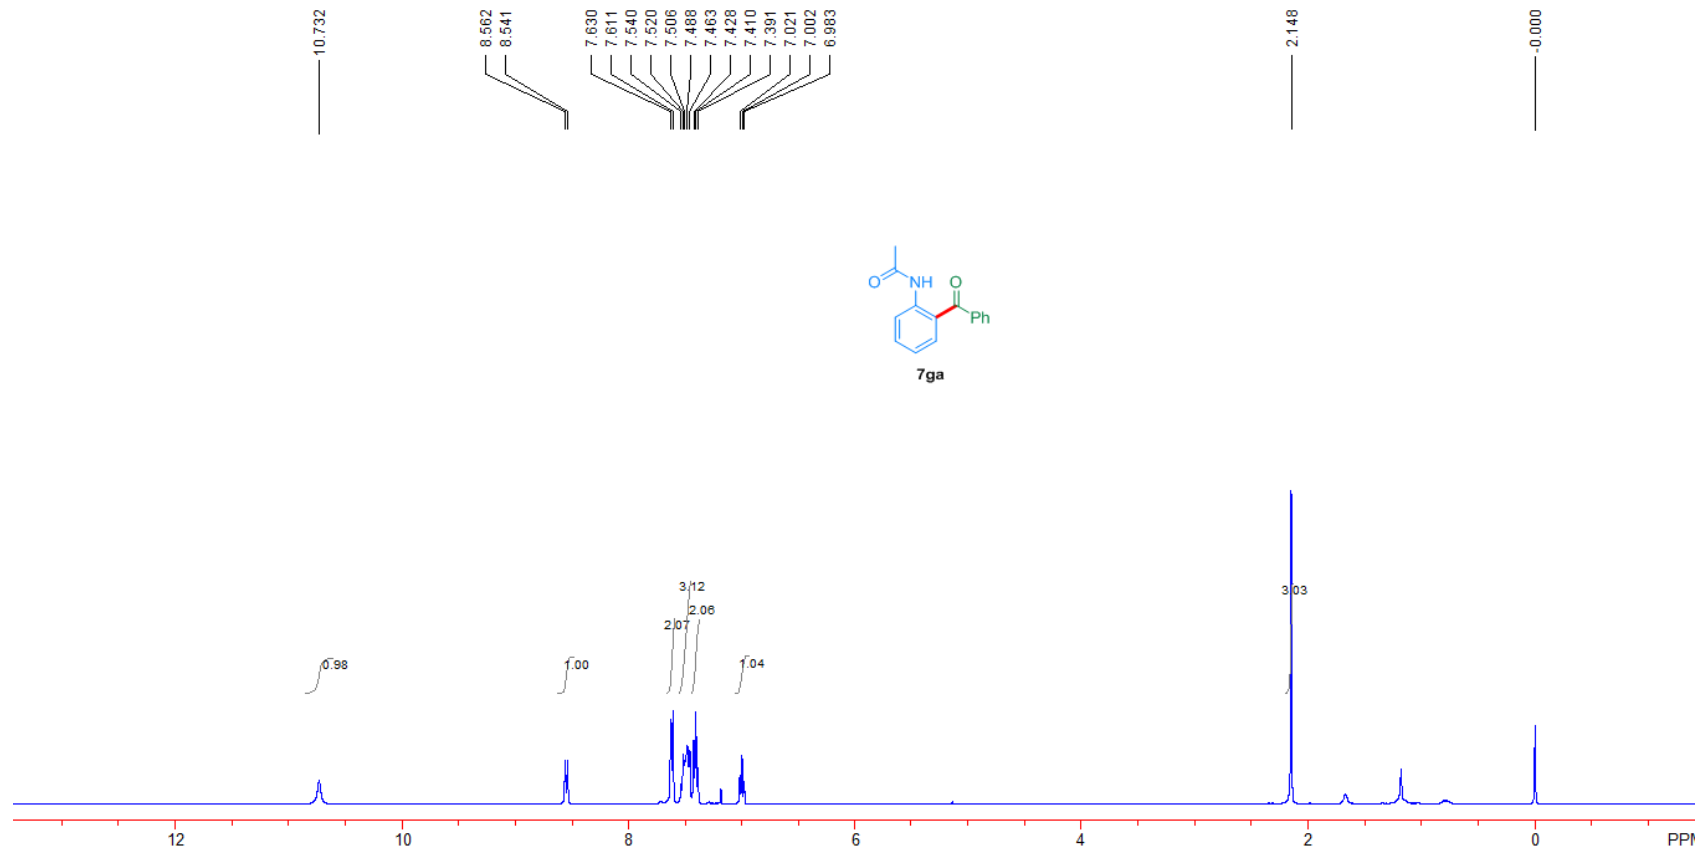

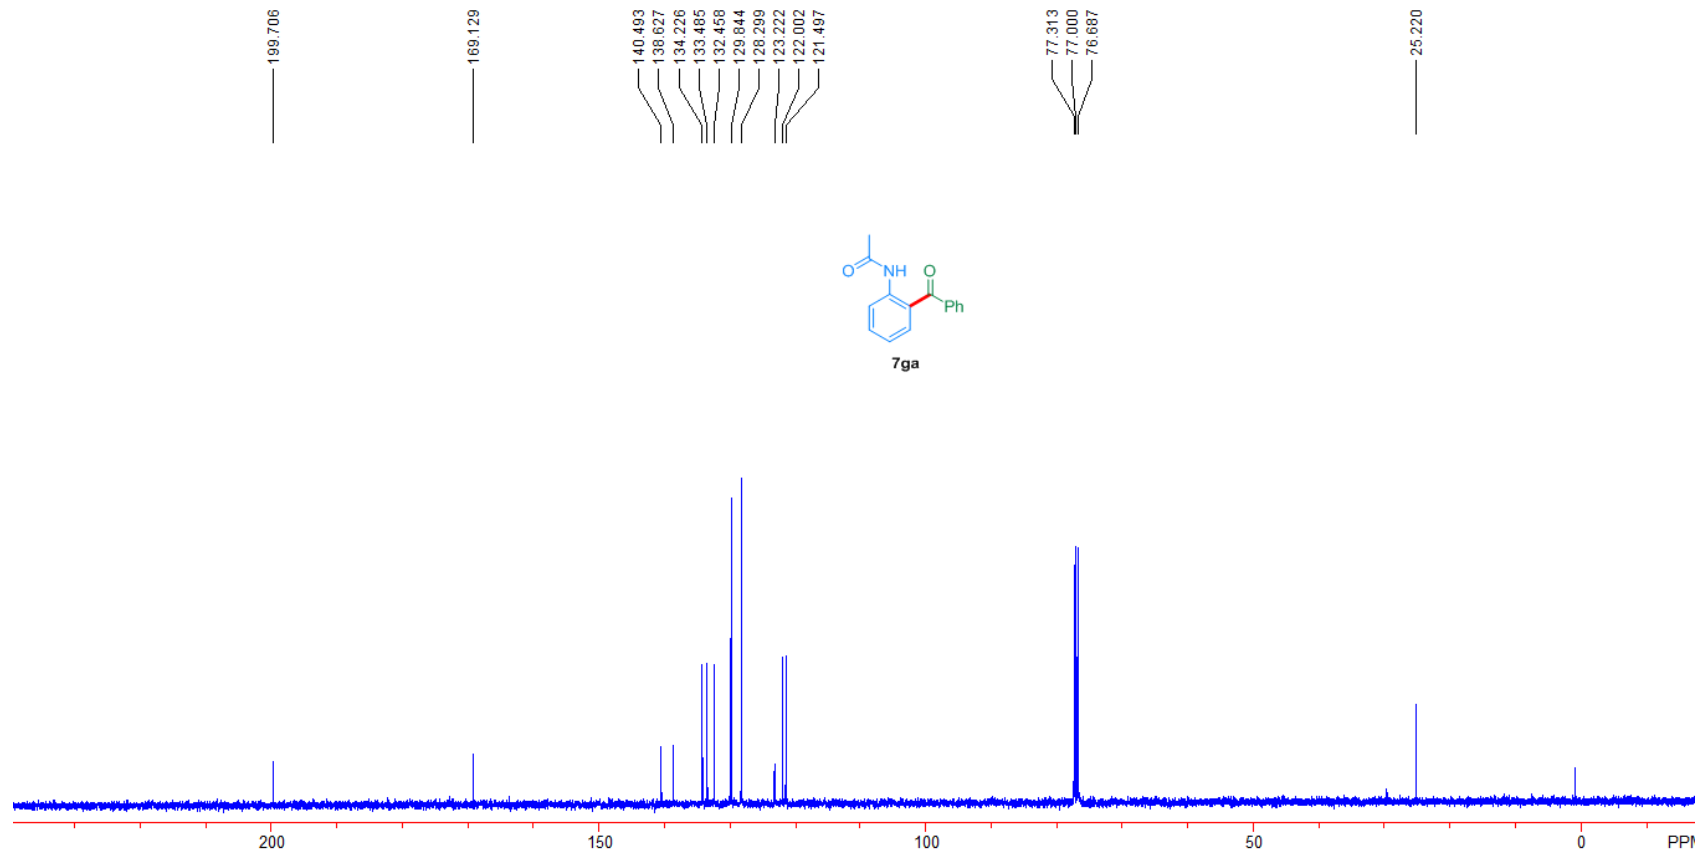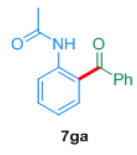

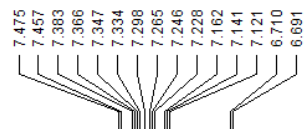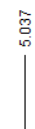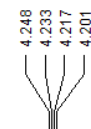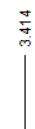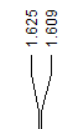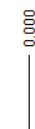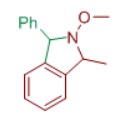

8

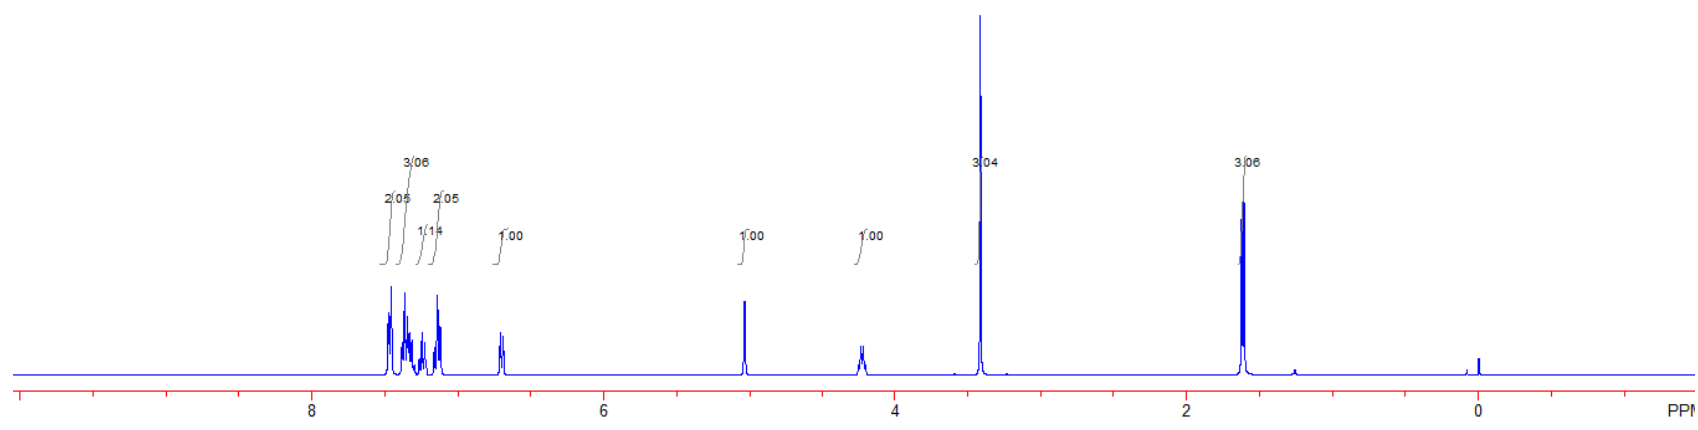

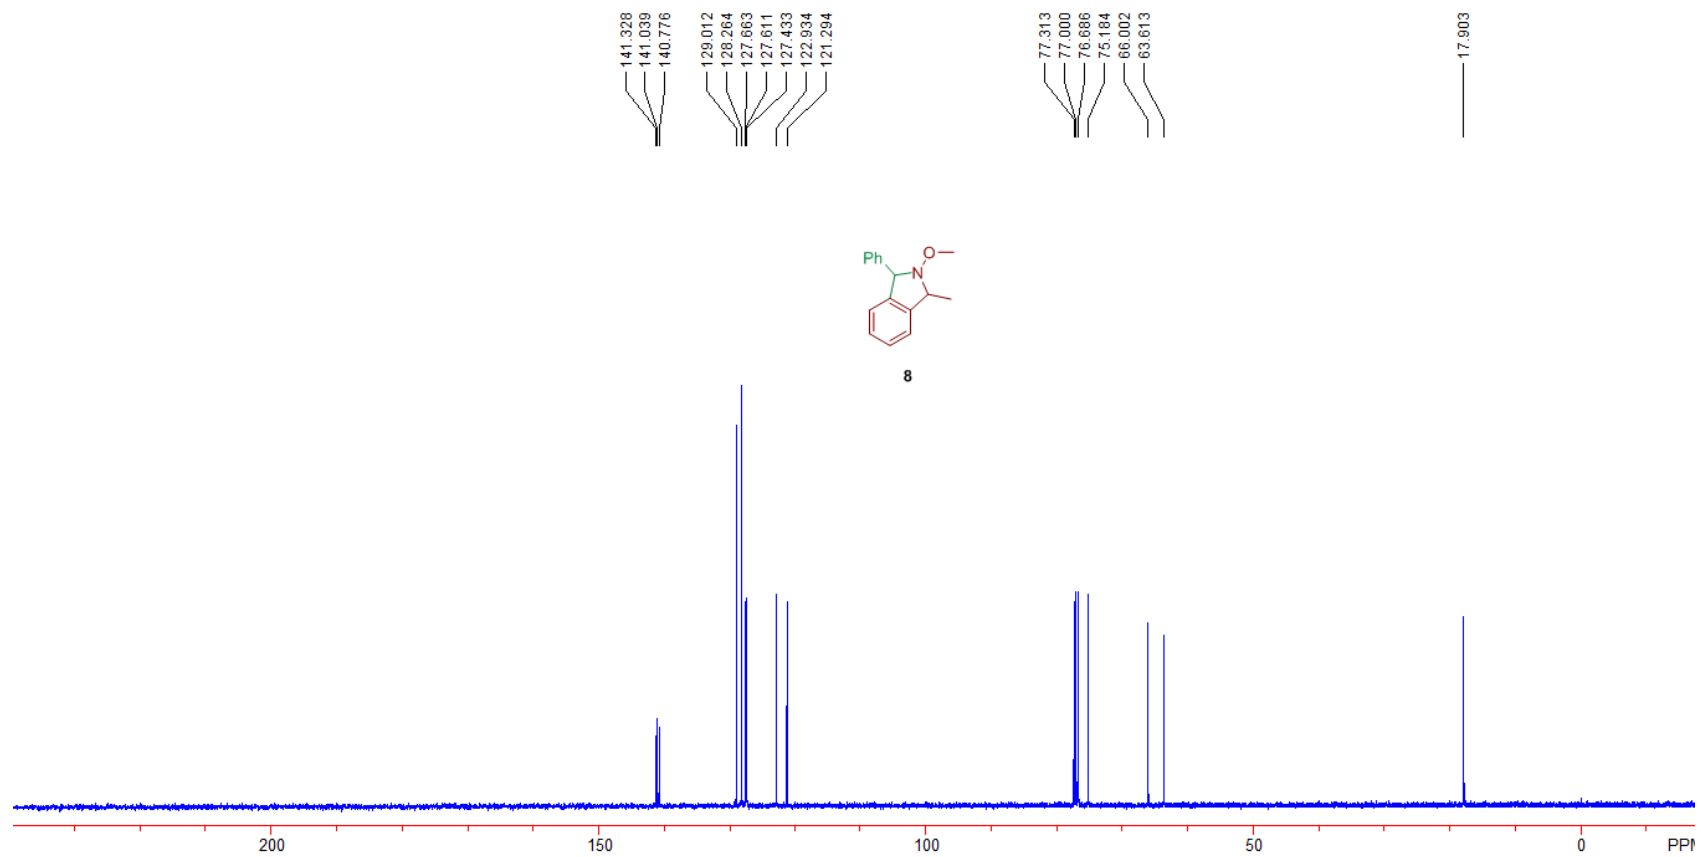

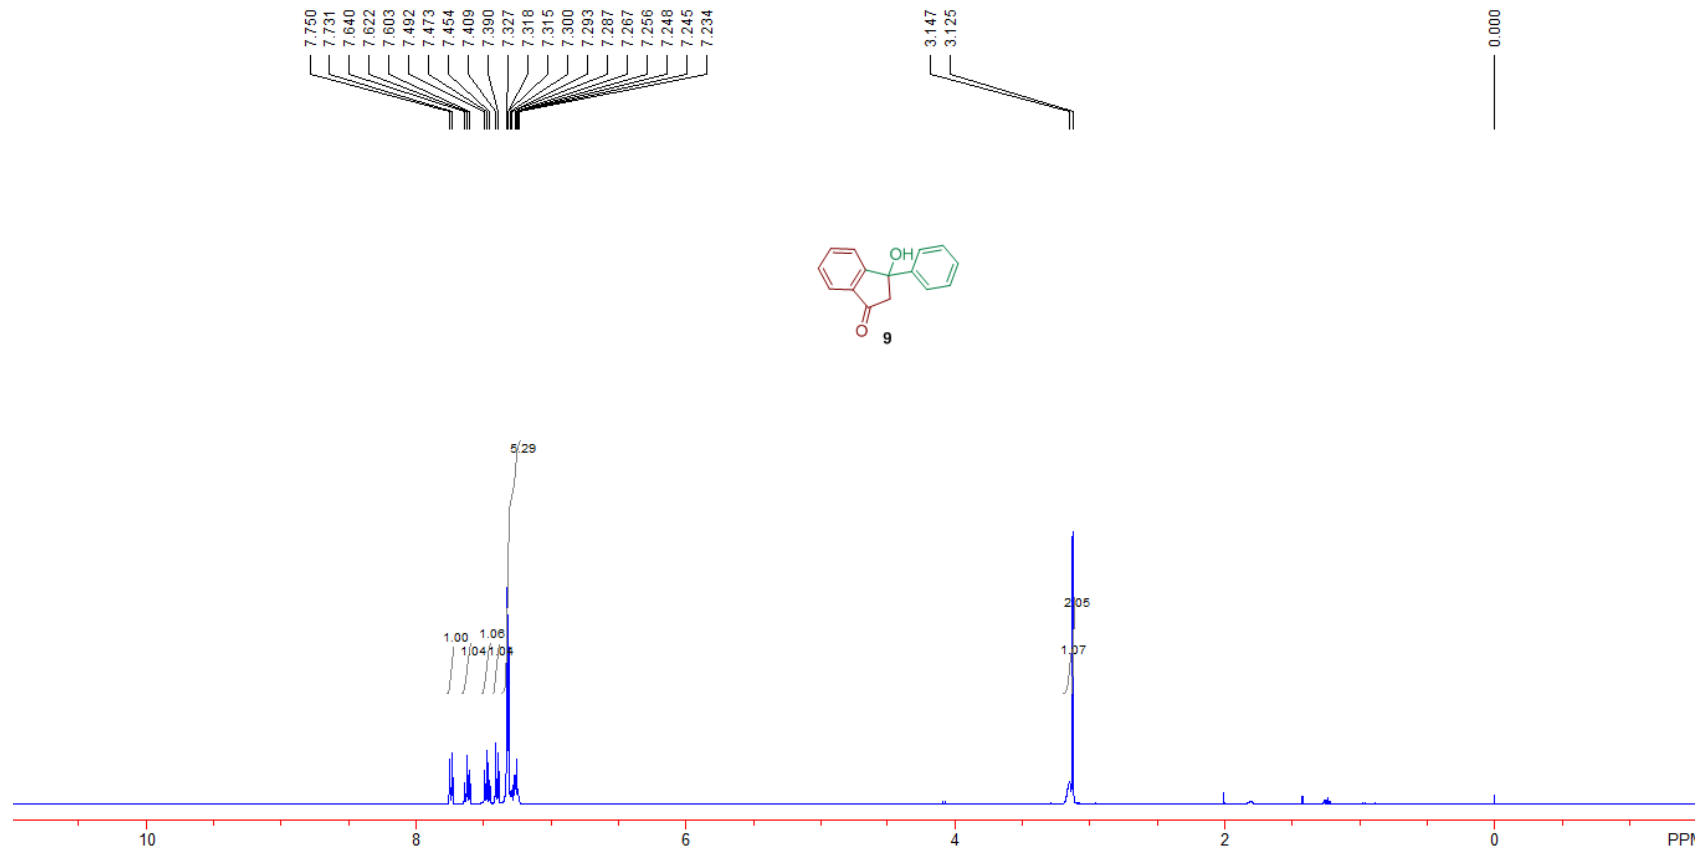



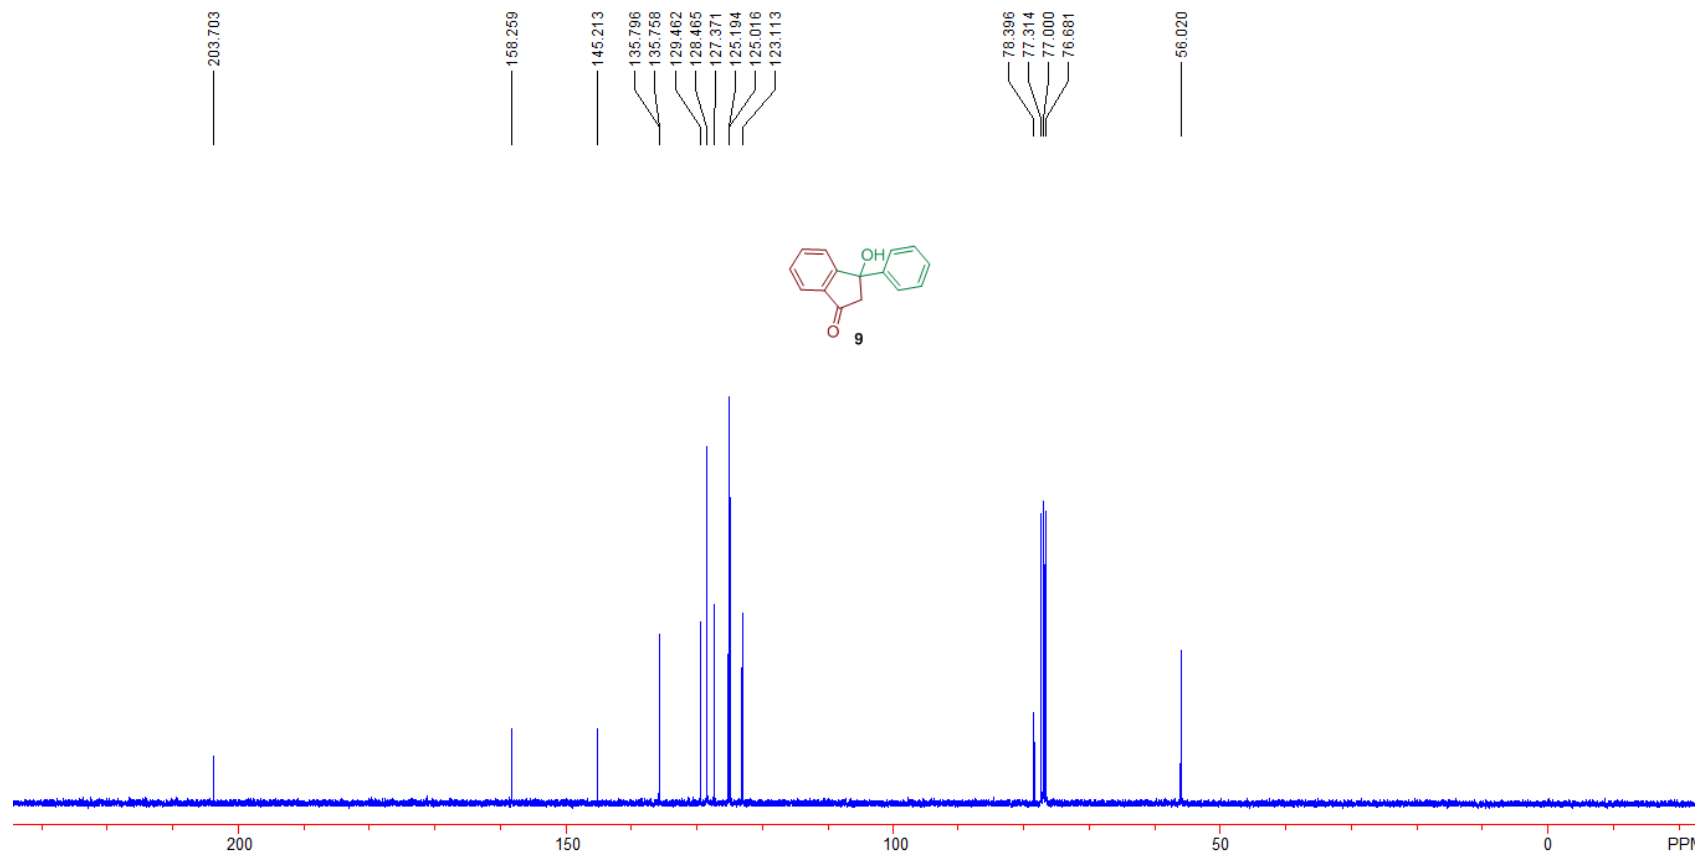

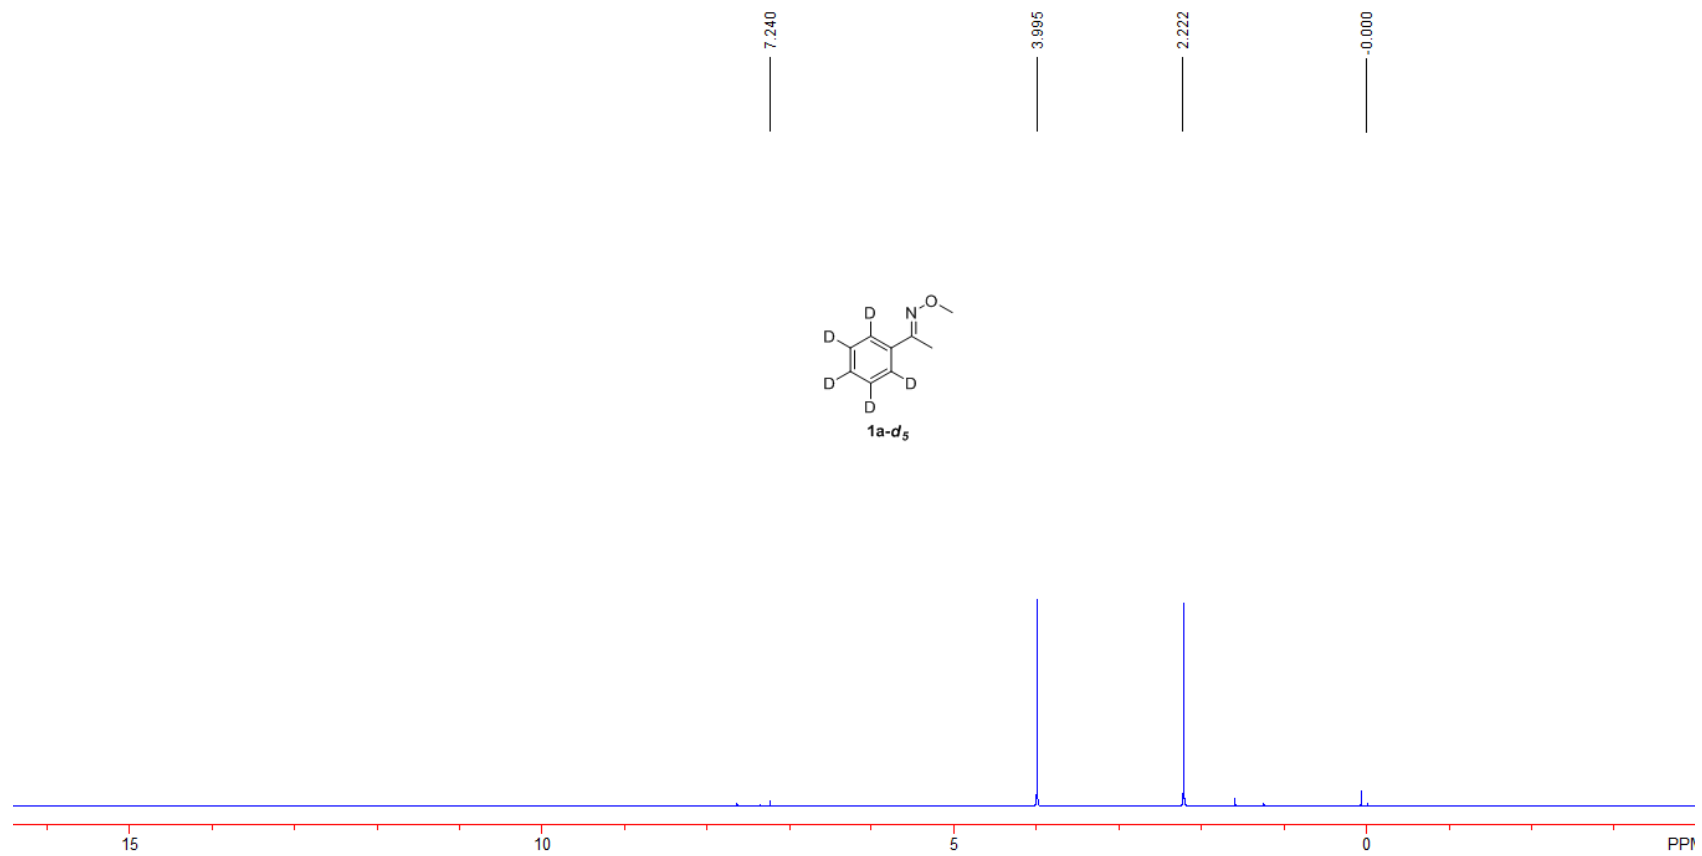

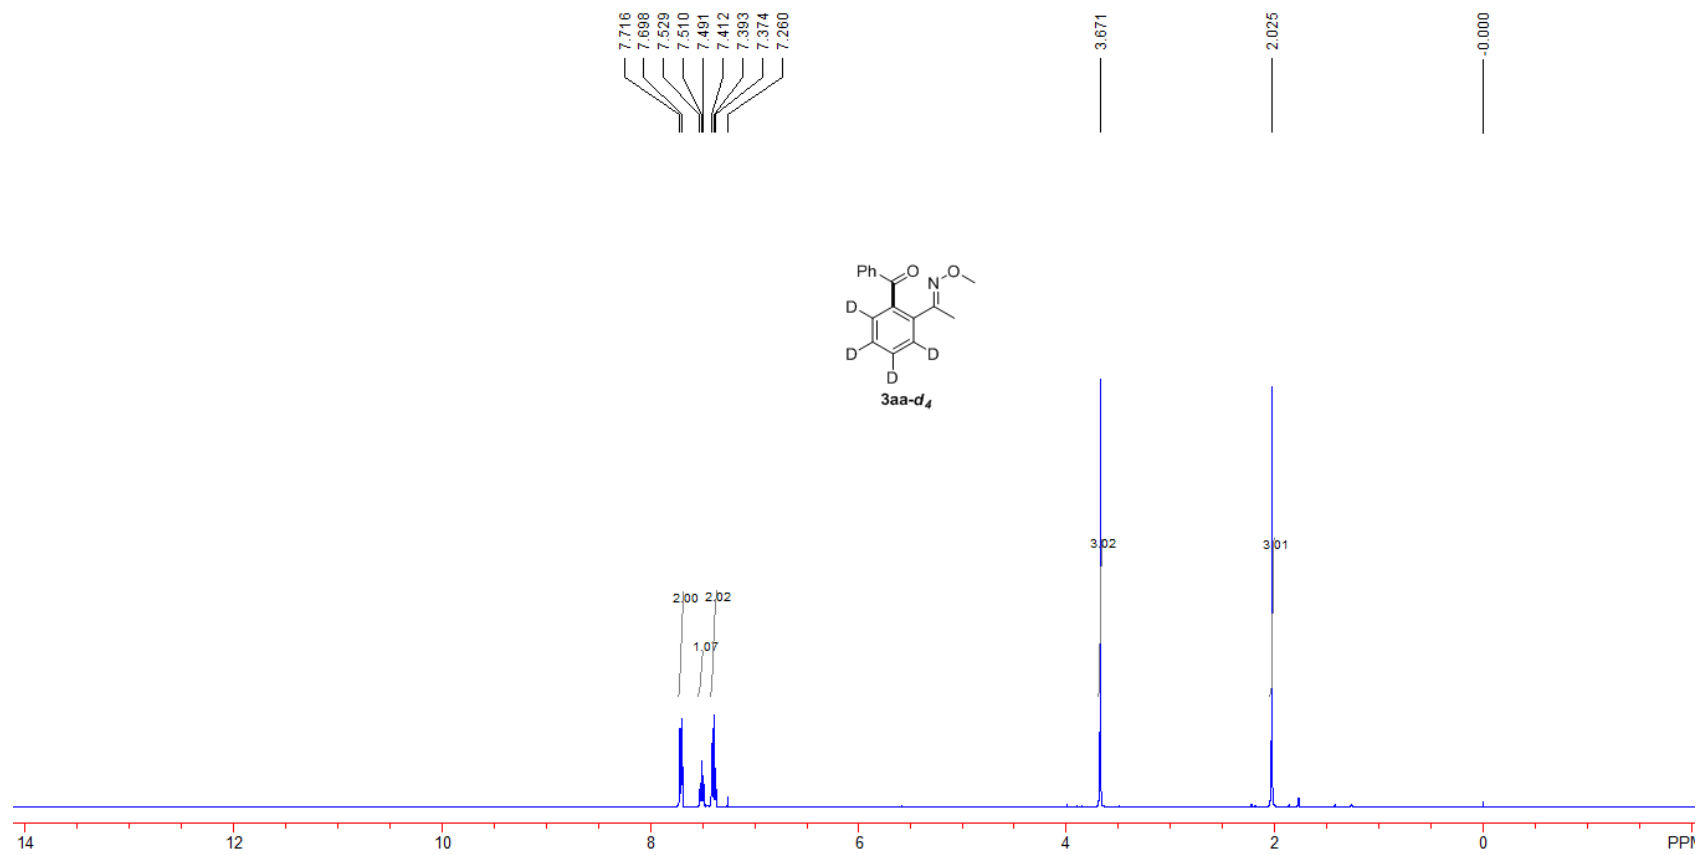

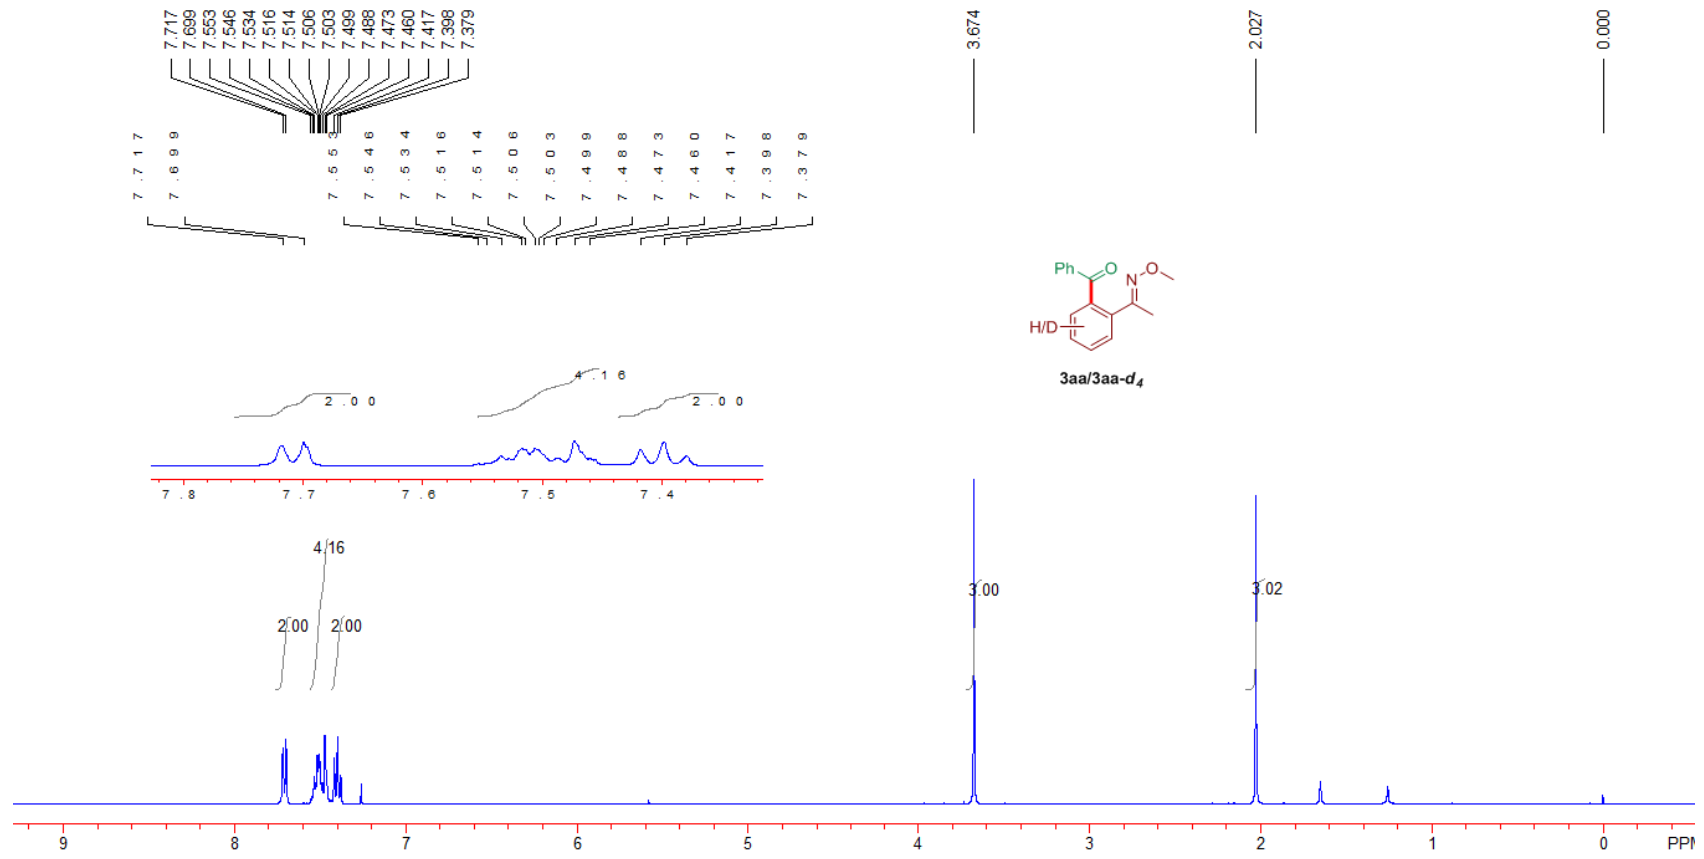

Supplement: c5cc08945j1.pdf [file c5cc08945j1.pdf]
